# Supplementary material
Source: PubMed Central journal article supplement (PMC4027526)
Supplement: ml300385q_si_001.pdf [file ml300385q_si_001.pdf]

## Supporting Information

# Synthesis and Antimycobacterial Activity of 2,1'-Dihydropyridomycins

Oliver P. Horlacher<sup>†</sup>, Ruben C. Hartkoorn<sup>‡</sup>, Stewart T. Cole<sup>‡</sup> and Karl-Heinz Altmann<sup>†\*</sup>

<sup>†</sup>Swiss Federal Institute of Technology (ETH) Zurich, Department of Chemistry and Applied Biosciences, Institute of Pharmaceutical Sciences, 8093 Zurich, Switzerland, and <sup>‡</sup>École Polytechnique Fédérale de Lausanne (EPFL), Global Health Institute, 1015 Lausanne, Switzerland.

[karl-heinz.altmann@pharma.ethz.ch](mailto:karl-heinz.altmann@pharma.ethz.ch)

### Contents

|                                                                          |        |
|--------------------------------------------------------------------------|--------|
| 1. General Methods.....                                                  | - 2 -  |
| 2. Synthesis of Building Block <b>5</b> .....                            | - 2 -  |
| 3. Synthesis of Building Blocks <b>6</b> and <i>epi-6</i> .....          | - 10 - |
| 4. Synthesis of Dihydropyridomycins <b>2</b> and <b>3</b> .....          | - 14 - |
| 5. <sup>1</sup> H- and <sup>13</sup> C-NMR Spectra of New Compounds..... | - 22 - |
| 6. Biological Evaluation .....                                           | - 71 - |
| 7. Crystallographic Data for <b>17</b> (CCDC 905295).....                | - 71 - |

## 1. General Methods

All manipulations were conducted under an argon atmosphere using flame-dried glassware and standard syringe/septa and Schlenk techniques. Absolute solvents were purchased from Fluka (absolute over molecular sieves). Commercial chemicals were used without further purification. Solvents for extractions, flash column chromatography (FC) and thin layer chromatography (TLC) were purchased as commercial grade and distilled prior to use. TLC was performed on Merck TLC aluminum sheets (silica gel 60 F254). Spots were visualized with UV light ( $\lambda = 254$  nm) or through staining with  $\text{Ce}_2(\text{SO}_4)_3$ /phosphomolybdic acid/ $\text{H}_2\text{SO}_4$  (CPS), vanillin/ $\text{H}_2\text{SO}_4$  or  $\text{KMnO}_4/\text{K}_2\text{CO}_3$ . Chromatographic purification of products by FC was performed using Fluka silica gel 60 for preparative column chromatography (particle size 40-63  $\mu\text{m}$ ).

NMR spectra were recorded on a Bruker Avance 400 MHz NMR spectrometer at 300 K. Chemical shifts ( $\delta$ ) are reported in ppm and are either referenced to the solvent signal as an internal standard (chloroform  $\delta$  7.26 ppm for  $^1\text{H}$  and  $\delta$  77.00 ppm for  $^{13}\text{C}$  spectra; DMSO- $d_6$   $\delta$  2.50 ppm for  $^1\text{H}$  and  $\delta$  39.43 ppm for  $^{13}\text{C}$  spectra). Data are reported as follows: s = singlet, d = doublet, t = triplet, q = quartet, quint = quintet, sext = sextet, m = multiplet, br = broad signal,  $J$  = coupling constant in Hz. All  $^{13}\text{C}$ -NMR spectra were measured with complete proton decoupling.  $^1\text{H}$ - and  $^{13}\text{C}$ -signals were assigned using two-dimensional correlation experiments (COSY, HMQC, HMBC). IR spectra were recorded on a Jasco FT/IR-6200 instrument as thin film. Optical rotations were measured on a Jasco P-1020 polarimeter operating at the sodium D line ( $\lambda = 589$  nm) and are reported as follows:  $[\alpha]_D^T$ , concentration ( $c$  in g/100 mL) and solvent. Melting points were obtained in open capillary tubes using a Büchi melting point apparatus B-540 and are uncorrected. Mass spectra were recorded by the MS service of the Laboratory of Organic Chemistry (LOC) of the ETH Zürich; HRMS (ESI) spectra were measured on a Bruker Daltonics maxis (UHR-TOF) and HRMS (EI) on a Waters Micromass AutoSpec Ultima instrument.

## 2. Synthesis of Building Block 5

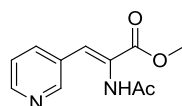

11

**Ester 11:** Pyridine-3-carbaldehyde (4.38 mL, 46.7 mmol, 1.00 eq.) was added to a mixture of *N*-acetylglycine (5.47 g, 46.7 mmol, 1.00 eq.) and NaOAc (4.21 g, 51.4 mmol, 1.10 eq.) followed by  $\text{Ac}_2\text{O}$  (24.8 mL, 243 mmol, 5.20 eq.) The dark brown mixture was stirred at 115 °C for 18 h. 10 mL MeOH were added (strongly exothermic!), in order to dilute the mixture, which was then poured into 40 mL MeOH containing 1.5 g NaOAc. The dark brown mixture was stirred at RT for 72 h. It was then partitioned between sat. aq.  $\text{Na}_2\text{CO}_3$  (20 mL) and  $\text{CHCl}_3$  (40 mL) and the aq. phase was extracted with

CHCl<sub>3</sub> (3 x 20 mL). The combined org. extracts were concentrated *in vacuo* and the crude product was purified by FC (CH<sub>2</sub>Cl<sub>2</sub>/MeOH 3% → 10%) to yield **11** (8.06 g, 78%) as yellow crystals which were recrystallized from hexane/EtOAc.

**mp:** 108-111 °C (Lit.: 110 °C, V. Busetti *et al.*, *J. Cryst. Spectrosc.* **1988**, *18*, 75-85)  
**<sup>1</sup>H-NMR:** (400 MHz, DMSO-d<sub>6</sub>): δ 9.74 (s, 1H), 8.76 (s, 1H), 8.53 (dd, *J* = 4.8, 1.6 Hz, 1H), 8.02 (dt, *J* = 8.0, 1.7 Hz, 1H), 7.45 (dd, *J* = 8.0, 4.8 Hz, 1H), 7.18 (s, 1H), 3.73 (s, 3H), 2.01 (s, 3H).  
**<sup>13</sup>C-NMR:** (100 MHz, CDCl<sub>3</sub>): δ = 168.5, 165.5, 150.7, 149.8, 136.4, 130.4, 128.0, 125.5, 123.5, 53.1, 23.7.  
**IR:** (neat, cm<sup>-1</sup>): 3237, 2995, 2953, 1721, 1670, 1587, 1567, 1510, 1435, 1371, 1338, 1264, 1219, 1192, 1125, 1025, 985, 808, 764, 733, 705, 634, 609, 521.  
**HR-MS:** (ESI): *m/z* calc. for C<sub>11</sub>H<sub>13</sub>N<sub>2</sub>O<sub>3</sub> [M+H]<sup>+</sup> 221.0921, found 221.0920.

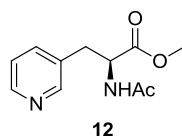

**Ester 12:** Olefin **11** (1.42 g, 6.45 mmol, 1.00 eq.) was dissolved in 75 mL freshly degassed MeOH and HBF<sub>4</sub> (50% in H<sub>2</sub>O, 2.22 mL, 9.67 mmol, 1.50 eq.) was added. The solution was transferred into an autoclave and [Rh(COD)(*R,R*-DIPAMP)]BF<sub>4</sub> (4.88 mg, 6.45 μmol, 0.001 eq.) was added. The autoclave was pressurized with H<sub>2</sub> and subsequently vented 5 x before application of the final pressure of 5 bar. The mixture was heated to 50 °C and stirred for 18 h. It was then concentrated *in vacuo*, neutralized with sat. aq. Na<sub>2</sub>CO<sub>3</sub> (15 mL) and extracted with CHCl<sub>3</sub> (4 x 20 mL). The crude product was purified by FC (CH<sub>2</sub>Cl<sub>2</sub>/MeOH 5%) to deliver **12** (1.22 g, 85%) as a yellow solid. The *ee* was determined by chiral HPLC (Daicel Chemical Industries, CHIRALPAK AD-H 0.46x15 cm column, isocratic hexane/*i*PrOH 9:1, 1.0 mL/min, *t<sub>R</sub>* major: 10.67 min, *t<sub>R</sub>* minor: 15.96 min).

**R<sub>f</sub>:** 0.25 (CH<sub>2</sub>Cl<sub>2</sub>/MeOH 5%)  
***ee*:** 87% (determined by HPLC analysis)  
**mp:** 98-101 °C (Lit.: 101-103 °C, C. Döbler *et al.*, *Tetrahedron: Asymmetry* **1996**, *7*, 117-125)  
**[α]<sub>D</sub><sup>20</sup>:** +100.3° (*c* 1.19, CHCl<sub>3</sub>) (Lit.: +105.1, *c* 1.08, CHCl<sub>3</sub>, *Tetrahedron: Asymmetry*, **1996**, *7*, 117-125)  
**<sup>1</sup>H-NMR:** (400 MHz, CDCl<sub>3</sub>): δ 8.48 (dd, *J* = 4.82, 1.66 Hz, 1H), 8.34 (d, *J* = 1.96 Hz, 1H), 7.44 (dt, *J* = 7.82, 1.95 Hz, 1H), 7.22 (ddd, *J* = 7.81, 4.83, 0.63 Hz, 1H), 6.16 (d, *J* = 6.88 Hz, 1H), 4.90 (ddd, *J* = 7.54, 5.75, 1H), 3.74 (s, 3H), 3.18 (dd, *J* = 14.05, 5.84, 2H), 3.08 (dd, *J* = 14.05, 5.64, 2H), 1.99 (s, 3H).  
**<sup>13</sup>C-NMR:** (100 MHz, CDCl<sub>3</sub>): δ 171.8, 169.8, 150.6, 148.7, 136.8, 131.8, 123.6, 53.0, 52.7, 35.3, 23.2.  
**IR:** (neat, cm<sup>-1</sup>): 3267, 3038, 2954, 1742, 1657, 1541, 1481, 1427, 1373, 1282, 1213, 1176, 1132, 1029, 802, 753, 714, 633, 597.  
**HR-MS:** (ESI): *m/z* calc. for C<sub>11</sub>H<sub>15</sub>N<sub>2</sub>O<sub>3</sub> [M+H]<sup>+</sup> 223.1077, found 223.1075.

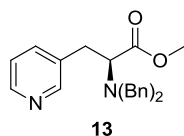

**Ester 13:** To acetamide **12** (350 mg, 1.58 mmol, 1.00 eq.) dissolved in 8.0 mL MeOH was added SOCl<sub>2</sub> (741 μL, 9.45 mmol, 5.00 eq.) at 0 °C. The solution was refluxed at 80 °C for 18 h. The mixture was concentrated and dissolved in toluene. The solvent was removed *in vacuo* and the yellow solid was portioned between CHCl<sub>3</sub> (10 mL) and sat. aq. Na<sub>2</sub>CO<sub>3</sub> (5 mL). The aq. phase was extracted with CHCl<sub>3</sub> (4 x 15 mL) and the combined org. extracts were concentrated *in vacuo* to yield the free amino ester (crude, 243 mg, 86%) as an orange oil. <sup>1</sup>H- and <sup>13</sup>C-NMR spectra confirmed the complete transformation to the free amine **27**:

**<sup>1</sup>H-NMR:** (400 MHz, CD<sub>3</sub>OD): δ = 8.97 (s, 1H), 8.86 (d, *J* = 5.64 Hz, 1H), 8.68 (d, *J* = 8.08 Hz, 1H), 8.14 (dd, *J* = 8.02, 5.86 Hz, 1H), 4.59 (t, *J* = 7.04 Hz, 1H), 3.83 (s, 3H), 3.60 (dd, *J* = 14.69, 7.48 Hz, 2H), 3.51 (dd, *J* = 14.71, 6.58 Hz, 2H).

**<sup>13</sup>C-NMR:** (101 MHz, CD<sub>3</sub>OD): δ = 169.5, 149.5, 143.6, 142.0, 137.5, 128.8, 54.0, 53.9, 33.8.

To a solution of the above amino ester (234 mg, 1.30 mmol, 1.00 eq.) in 5 mL MeOH and 0.5 mL AcOH, benzaldehyde (791 μL, 7.79 mmol, 6.00 eq.), NaCNBH<sub>3</sub> (163 mg, 2.60 mmol, 2.00 eq.) and molecular sieves (4 Å) were added at RT and the suspension was stirred for 24 h. The mixture was neutralized with sat. aq. NaHCO<sub>3</sub> (5 mL) and extracted with Et<sub>2</sub>O (3 x 10 mL). The combined org. extracts were dried over MgSO<sub>4</sub> and concentrated *in vacuo*. The residue was purified by FC (hexane/EtOAc 4:1 → 7:3 → 0:1) to yield **13** (411 mg, 88%) as a colorless oil.

**R<sub>f</sub>:** 0.21 (hexane/EtOAc 4:1)

**[α]<sub>D</sub><sup>20</sup>:** -88.16° (c 1.20, CHCl<sub>3</sub>)

**<sup>1</sup>H-NMR:** (400 MHz, CDCl<sub>3</sub>): δ 8.49 (dd, *J* = 4.8, 1.7 Hz, 1H), 8.33 (d, *J* = 1.8 Hz, 1H), 7.31 – 7.18 (m, 11H), 7.14 (ddd, *J* = 7.8, 4.8, 0.8 Hz, 1H), 3.97 (d, *J* = 13.8 Hz, 2H), 3.79 (s, 3H), 3.66 (dd, *J* = 8.6, 6.8 Hz, 1H), 3.57 (d, *J* = 13.9 Hz, 2H), 3.05 (ddd, *J* = 22.9, 14.3, 7.7 Hz, 2H).

**<sup>13</sup>C-NMR:** (100 MHz, CDCl<sub>3</sub>): δ 172.5, 150.9, 147.9, 139.0, 136.8, 133.9, 128.8, 128.4, 127.3, 123.2, 62.0, 54.7, 51.4, 33.1.

**IR:** (neat, cm<sup>-1</sup>): 3028, 2950, 2843, 1730, 1576, 1494, 1479, 1453, 1425, 1374, 1361, 1291, 1214, 1195, 1162, 1128, 1075, 1028, 990, 787, 747, 715, 699.

**HR-MS:** (ESI): *m/z* calc. for C<sub>23</sub>H<sub>25</sub>N<sub>2</sub>O<sub>2</sub> [M+H]<sup>+</sup> 361.1911, found 361.1914.

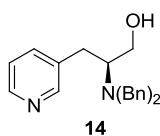

**Alcohol 14:** Ester **13** (943 mg, 2.62 mmol, 1.00 eq.) was dissolved in 17 mL Et<sub>2</sub>O and the solution was cooled to 0 °C. LAH (199 mg, 5.23 mmol, 2.00 eq.) was added and the suspension was stirred at 0 °C for 30 min and quenched with 2 mL H<sub>2</sub>O, 2 mL 10% NaOH, 6 mL H<sub>2</sub>O. The mixture was filtered, the filtrate was concentrated *in vacuo* and the residue purified by FC (hexane/EtOAc 2:3) to yield **14** (865 mg, 99%) as a colorless oil.

**R<sub>f</sub>:** 0.26 (hexane/EtOAc 2:3)  
**[α]<sub>D</sub><sup>20</sup>:** + 26.33° (c 1.00, CHCl<sub>3</sub>)  
**<sup>1</sup>H-NMR:** (400 MHz, CDCl<sub>3</sub>): δ 8.38 (dd, *J* = 4.8, 1.6 Hz, 1H), 8.32 (d, *J* = 1.8 Hz, 1H), 7.35 – 7.15 (m, 11H), 7.12 (ddd, *J* = 7.8, 4.8, 0.6 Hz, 1H), 3.87 (d, *J* = 13.3 Hz, 2H), 3.54 – 3.41 (m, 3H), 3.34 – 3.22 (m, 1H), 3.07 – 2.93 (m, 2H), 2.90 – 2.79 (m, 1H), 2.46 – 2.35 (m, 1H).  
**<sup>13</sup>C-NMR:** (100 MHz, CDCl<sub>3</sub>): δ 150.4, 147.8, 138.8, 136.3, 134.8, 128.9, 128.6, 127.5, 123.4, 60.7, 60.3, 53.4, 29.2.  
**IR:** (neat, cm<sup>-1</sup>): 3304 (br.), 3061, 3028, 2930, 2834, 2804, 1578, 1494, 1480, 1453, 1425, 1363, 1129, 1044, 1028, 779, 746, 732, 714, 699.  
**HR-MS:** (ESI): *m/z* calc. for C<sub>22</sub>H<sub>25</sub>N<sub>2</sub>O [M+H]<sup>+</sup> 333.1961, found 333.1952.

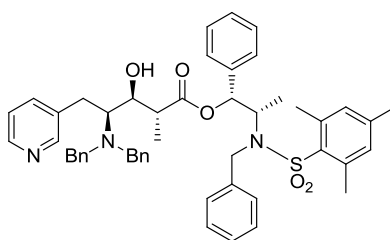

**16**

**Ester 16:** Alcohol **14** (40.0 mg, 332 μmol, 1.00 eq.) was dissolved in 1 mL CH<sub>2</sub>Cl<sub>2</sub> and DMP (76.6 mg, 424 μmol, 1.50 eq.) was added at 0 °C. The suspension was stirred at 0 °C for 30 min and then diluted with Et<sub>2</sub>O (1 mL). The reaction was quenched with 1 mL DMP workup solution (14 g sodium thiosulfate in 1 L 80% sat. aq. NaHCO<sub>3</sub>) and the resulting mixture was stirred at 0 °C for 30 min. The aq. phase was extracted with Et<sub>2</sub>O (3 x 5 mL). The combined org. extracts were washed with H<sub>2</sub>O and brine (1 x 2 mL each), dried over MgSO<sub>4</sub> and concentrated *in vacuo* at 20 °C. The crude aldehyde **7** was dried at 10<sup>-3</sup> mbar (RT) for 4 h. (1*R*,2*S*)-2-(*N*-benzyl-2,4,6-trimethylphenylsulfonamido)-1-phenylpropyl propionate (**15**) (75.1 mg, 157 μmol, 1.50 eq.) was dissolved in 1 mL CH<sub>2</sub>Cl<sub>2</sub> and NEt<sub>3</sub> (54.4 μl, 392 μmol, 3.75 eq.) was added. The solution was cooled to -78 °C and dicyclohexylboron trifluoromethanesulfonate (112 mg, 345 μmol, 3.30 eq.) in 350 μl hexane was added dropwise during 15 min. The resulting solution was stirred at -78 °C for 3 h. Aldehyde **7** (34.5 mg, 104 μmol, 1.00 eq.) dissolved in 0.5 mL CH<sub>2</sub>Cl<sub>2</sub> was added dropwise during 20 min and the solution was stirred at -78 °C for 3 h. The mixture was warmed very slowly to 0 °C and stirred for 1 h. The reaction was then quenched with 1 mL pH 7 buffer, and the mixture was diluted with 4.5 mL MeOH and stirred with 0.45 mL H<sub>2</sub>O<sub>2</sub> (50%) at RT for 16 h. The org. solvents were removed *in vacuo* and the residue was taken up in CH<sub>2</sub>Cl<sub>2</sub> (5 mL) and H<sub>2</sub>O (5 mL). The aq. phase was extracted with CH<sub>2</sub>Cl<sub>2</sub> (3 x 5 mL) and the combined org. extracts were dried over MgSO<sub>4</sub>. The solvents were removed *in vacuo* and the residue was purified by FC (hexane/EtOAc 3:2) to yield **16** (71.1 mg, 73% over 2 steps) as a 5:1 mixture of isomers (**16** vs. all other isomers). The desired isomer **16** could be isolated from this mixture in pure form by FC with hexane/EtOAc 3:2 as eluent (50.7 mg, 52% over 2 steps). Analytical data are for pure isomer **16**.

**R<sub>f</sub>:** 0.24 (hexane/EtOAc 3:2)  
**[α]<sub>D</sub><sup>20</sup>:** + 20.22° (c 1.03, CHCl<sub>3</sub>)  
**<sup>1</sup>H-NMR:** (400 MHz, CDCl<sub>3</sub>): δ 8.48 (d, *J* = 1.7 Hz, 1H), 8.44 (dd, *J* = 4.8, 1.6 Hz, 1H), 7.50 (dt, *J* = 7.8, 1.9 Hz, 1H), 7.38 – 7.05 (m, 19H), 6.89 – 6.81 (m, 4H), 5.80 (d, *J* = 4.0 Hz, 1H), 4.70 (d, *J* = 16.5 Hz, 1H), 4.51 (d, *J* = 16.5 Hz, 1H), 4.19 (d, *J* = 13.1 Hz, 2H), 4.16 – 4.08 (m, 1H), 3.44 (d, *J* = 13.5 Hz, 2H), 3.39 – 3.31 (m, 1H), 3.28 (d, *J* = 3.3 Hz, 1H), 3.13 – 2.99 (m, 3H), 2.93 – 2.84 (m, 1H), 2.48 (s, 6H), 2.27 (s, 3H), 1.13 (d, *J* = 7.0 Hz, 3H), 0.45 (d, *J* = 7.1 Hz, 3H).  
**<sup>13</sup>C-NMR:** (100 MHz, CDCl<sub>3</sub>): δ 174.8, 150.6, 147.6, 142.5, 140.3, 139.7, 138.3, 138.2, 136.8, 135.7, 133.5, 132.1, 129.1, 128.4, 128.3, 127.9, 127.5, 127.2, 127.0, 125.9, 123.4, 78.4, 72.9, 59.1, 56.8, 55.6, 48.2, 42.6, 26.9, 22.9, 20.9, 13.1, 12.9.  
**IR:** (neat, cm<sup>-1</sup>): 3062, 3028, 2979, 2939, 1738, 1604, 1495, 1454, 1378, 1323, 1261, 1205, 1151, 1029, 1013, 931, 857, 751, 730, 699, 661, 568, 538.  
**HR-MS:** (ESI): *m/z* calc. for C<sub>50</sub>H<sub>56</sub>N<sub>3</sub>O<sub>5</sub>S [M+H]<sup>+</sup> 810.3935, found 810.3934.

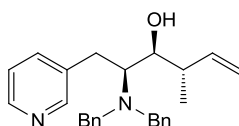

18

**Olefin 18:** Alcohol **14** (408 mg, 1.23 mmol, 1.00 eq.) was dissolved in 9 mL anhydrous DCM and DMP (781 mg, 1.84 mmol, 1.50 eq.) was added at 0 °C. The suspension was stirred at 0 °C for 30 min and then diluted with Et<sub>2</sub>O (10 mL). The reaction was quenched with 8 ml DMP workup mix and the solution was stirred for 30 min at 0 °C. The aq. phase was extracted with Et<sub>2</sub>O (3 x 15 mL). The combined org. extracts were washed with H<sub>2</sub>O and brine (1 x 2 mL each), dried over MgSO<sub>4</sub> and concentrated *in vacuo* at 20 °C. The crude aldehyde **7** was dried at 10<sup>-3</sup> mbar (RT) for 4 h. A solution of this aldehyde (370 mg, 1.12 mmol, 1.00 eq.) in 10 ml THF was added to CrCl<sub>2</sub> (1.10 g, 8.96 mmol, 8.00 eq.) which had been dried at 200 °C under vacuum for 25 min. This was followed by addition of crotylbromide (576 μl, 5.60 mmol, 5.00 eq.) and the mixture was stirred at RT for 3 h (color change from green to brown). The reaction was quenched with sat. aq. NaHCO<sub>3</sub> (5 mL) and extracted with EtOAc (3 x 10 mL). The combined org. extracts were dried over MgSO<sub>4</sub> and concentrated *in vacuo*. The residue was purified by FC (hexane/EtOAc 1:4) to yield **18** as a yellow oil (308 mg, 67% over 2 steps, 15:1 ratio of isomers).

**R<sub>f</sub>:** 0.26 (hexane/EtOAc 1:4)  
**<sup>1</sup>H-NMR:** (400 MHz, CDCl<sub>3</sub>): δ 8.40 (dd, *J* = 4.7, 1.1 Hz, 1H), 8.34 (d, *J* = 1.8 Hz, 1H), 7.27 (d, *J* = 7.8 Hz, 1H), 7.22 – 7.00 (m, 11H), 5.52 – 5.40 (m, 1H), 5.04 (dd, *J* = 10.3, 1.4 Hz, 1H), 4.93 (d, *J* = 17.2 Hz, 1H), 3.78 (d, *J* = 14.1 Hz, 2H), 3.69 (d, *J* = 7.3 Hz, 1H), 3.54 (d, *J* = 14.1 Hz, 2H), 2.98 – 2.89 (m, 2H), 2.74 (dd, *J* = 17.9, 8.7 Hz, 1H), 2.23 – 2.10 (m, 1H), 0.78 (d, *J* = 6.8 Hz, 3H).  
**<sup>13</sup>C-NMR:** (100 MHz, CDCl<sub>3</sub>): δ 151.0, 147.1, 139.8, 139.8, 136.9, 136.8, 128.7, 128.2, 126.9, 123.0, 117.7, 73.1, 60.2, 54.4, 42.6, 29.2, 16.8.  
**HR-MS:** (ESI): *m/z* calc. for C<sub>26</sub>H<sub>31</sub>N<sub>2</sub>O [M+H]<sup>+</sup> 378.2431, found 387.2427.

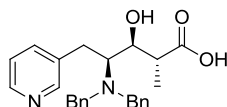

5

**Acid 5:**

**A) From ester 16:** To a solution of **16** (176 mg, 217  $\mu\text{mol}$ , 1.00 eq.) in 5.2 mL MeOH/THF/H<sub>2</sub>O 3:2:2 was added LiOH·H<sub>2</sub>O (45.6 mg, 1.09 mmol, 5.00 eq.) at RT. The clear solution was stirred at RT for 24 h and diluted with Et<sub>2</sub>O (7 mL). The aq. phase was acidified to pH 2 (aq. HCl 1 M) and the cleaved auxiliary was extracted, leaving the product in the aq. phase. The latter was adjusted to pH 7 (sat. aq. NaHCO<sub>3</sub>) and the product was extracted with CHCl<sub>3</sub> (4 x 15 mL). The org. phase was dried over MgSO<sub>4</sub> and concentrated *in vacuo* to yield **5** as a yellow, viscous resin (84.1 mg, 96%).

**B) From olefin 18:** To a solution of AD-mix  $\alpha$  (1.51 g) and **18** (136 mg, 351  $\mu\text{mol}$ , 1.00 eq.) in 3.8 mL *t*-BuOH/H<sub>2</sub>O 1:1 was added methanesulfonamide (201 mg, 2.11 mmol, 6.00 eq.). The yellow suspension was stirred at RT for 3 d. 0.9 mL H<sub>2</sub>O and 1.3 g Na<sub>2</sub>SO<sub>3</sub> were added and the mixture was stirred for 30 min. The mixture was extracted with CH<sub>2</sub>Cl<sub>2</sub> (3 x 10 mL), the org. phase was dried over MgSO<sub>4</sub> and concentrated *in vacuo*. The residue was filtered through silica (CH<sub>2</sub>Cl<sub>2</sub>/MeOH 10%) to yield the crude diol (125 mg, 84%) as a white foam. This material (125 mg, 297  $\mu\text{mol}$ , 1.00 eq.) was dissolved in 1.5 mL CH<sub>2</sub>Cl<sub>2</sub> and NaIO<sub>4</sub> (254 mg, 1.19 mmol, 4.00 eq.) in 900  $\mu\text{L}$  H<sub>2</sub>O was added. The biphasic mixture was stirred at RT for 1 h. The aq. phase was extracted with Et<sub>2</sub>O (3 x 5 mL) and concentrated *in vacuo*. The residue was dissolved in 2.88 mL *t*-BuOH/H<sub>2</sub>O 4:1, 2,3-dimethylbutene (710  $\mu\text{L}$ , 5.95 mmol, 20.0 eq.), NaClO<sub>2</sub> (134 mg, 1.49 mmol, 5.00 eq.) and NaH<sub>2</sub>PO<sub>4</sub> (250 mg, 2.08 mmol, 7.00 eq., dissolved in H<sub>2</sub>O) were added, and the clear biphasic mixture was stirred for 45 min at RT. 2 M HCl was added to pH 2 and the aq. phase was extracted with pentane (removal of scavenger). The aq. phase was adjusted to pH 7.5 (NaHCO<sub>3</sub>) and extracted with CHCl<sub>3</sub> (4 x 10 mL). The org. phase was dried over MgSO<sub>4</sub> and concentrated to deliver **5** a yellow, viscous resin (64.3 mg, 45% from olefin **18**).

**R<sub>f</sub>:** 0.08 (hexane/EtOAc 3:7)

**[ $\alpha$ ]<sub>D</sub><sup>20</sup>:** +35.6° (c 0.540, CHCl<sub>3</sub>)

**<sup>1</sup>H-NMR:** (400 MHz, CDCl<sub>3</sub>):  $\delta$  8.48 (s, 1H), 8.40 (d, *J* = 3.3 Hz, 1H), 7.53 (d, *J* = 7.9 Hz, 1H), 7.29 – 7.04 (m, 11H), 4.05 (d, *J* = 12.8 Hz, 2H), 3.46 (t, *J* = 5.6 Hz, 1H), 3.39 (d, *J* = 13.4 Hz, 2H), 3.04 – 2.89 (m, 3H), 2.80 – 2.64 (m, 1H), 0.84 (d, *J* = 7.1 Hz, 3H).

**<sup>13</sup>C-NMR:** (100 MHz, CDCl<sub>3</sub>):  $\delta$  177.7, 149.5, 146.3, 138.8, 137.8, 136.3, 129.2, 128.5, 127.4, 123.8, 73.0, 61.0, 55.1, 42.2, 28.6, 14.6.

**IR:** (neat, cm<sup>-1</sup>): 3411, 3062, 3027, 2973, 2936, 2804, 1713, 1494, 1454, 1423, 1376, 1302, 1266, 1196, 1129, 1090, 1075, 1049, 1027, 1007, 983, 751, 700.

**HR-MS:** (ESI): *m/z* calc. for C<sub>25</sub>H<sub>29</sub>N<sub>2</sub>O<sub>3</sub> [M+H]<sup>+</sup> 405.2173, found 405.2173.

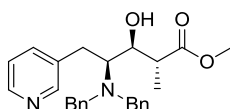

**22**

**Ester 22:** Acid **5** (7.90 mg, 19.5  $\mu\text{mol}$ , 1.00 eq.) was dissolved in 0.3 mL MeOH and 0.5 mL toluene. TMSCHN<sub>2</sub> (2.0 M in Et<sub>2</sub>O, 10.7  $\mu\text{l}$ , 21.5  $\mu\text{mol}$ , 1.10 eq.) was added at 0 °C (after the last drop, the pale yellow color persisted) and the mixture was stirred at 0 °C for 5 min. The reaction was quenched with 3 drops of acetic acid and the solvents were removed *in vacuo*. The residue was purified by FC (hexane/EtOAc 2:3) to yield **22** (6.60 mg, 81%) as a colorless oil.

**R<sub>f</sub>:** 0.25 (hexane/EtOAc 2:3)

**[ $\alpha$ ]<sub>D</sub><sup>20</sup>:** +17.7° (c 1.39, CHCl<sub>3</sub>)

**<sup>1</sup>H-NMR:** (400 MHz, CDCl<sub>3</sub>):  $\delta$  8.57 (d, *J* = 1.8 Hz, 1H), 8.52 (dd, *J* = 4.8, 1.6 Hz, 1H), 7.59 (dt, *J* = 7.8, 1.9 Hz, 1H), 7.36 – 7.22 (m, 11H), 4.09 (d, *J* = 13.1 Hz, 2H), 3.55 – 3.49 (m, 1H), 3.46 (s, 3H), 3.42 (d, *J* = 13.3 Hz, 2H), 3.16 – 3.05 (m, 2H), 3.04 – 2.96 (m, 1H), 2.90 – 2.81 (m, 1H), 0.81 (d, *J* = 7.1 Hz, 3H).

**<sup>13</sup>C-NMR:** (100 MHz, CDCl<sub>3</sub>):  $\delta$  175.4, 150.6, 147.7, 139.1, 136.8, 135.8, 129.2, 128.5, 127.3, 123.4, 73.3, 59.7, 54.9, 51.5, 41.9, 28.5, 14.2.

**IR:** (neat, cm<sup>-1</sup>): 3259, 3027, 1733, 1453, 1424, 1262, 1195, 1166, 1129, 1092, 1075, 1028, 1013, 752, 732, 700.

**HR-MS:** (ESI): *m/z* calc. for C<sub>26</sub>H<sub>30</sub>N<sub>2</sub>NaO<sub>3</sub> [M+Na]<sup>+</sup> 441.2149, found 441.2136.

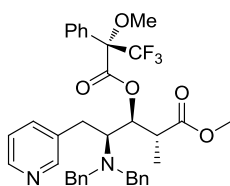

**23**

**S-Mosher ester 23:** To a solution of **22** (6.60 mg, 15.8  $\mu\text{mol}$ , 1.00 eq.) in 0.2 mL CH<sub>2</sub>Cl<sub>2</sub> were added pyridine (3.80  $\mu\text{l}$ , 47.3  $\mu\text{mol}$ , 3.00 eq.), DMAP (6.70 mg, 55.2  $\mu\text{mol}$ , 3.50 eq.) and (*R*)-(-)-MTPA-Cl (8.90  $\mu\text{l}$ , 47.3  $\mu\text{mol}$ , 3.00 eq.) at RT. The solution was stirred at RT for 24 h and (*R*)-(-)-MTPA-Cl (17.8  $\mu\text{l}$ , 94.6  $\mu\text{mol}$ , 6.00 eq.) was added. After 3 h, sat. aq. NaHCO<sub>3</sub> (1 mL) was added and the aq. phase was extracted with CH<sub>2</sub>Cl<sub>2</sub> (3 x 3 mL). The org. phase was dried over MgSO<sub>4</sub> and concentrated *in vacuo*. The yellow residue was purified by FC (hexane/EtOAc 1:1) to deliver **23** as a colorless film (1.2 mg, 12%).

**<sup>1</sup>H-NMR:** (400 MHz, CDCl<sub>3</sub>):  $\delta$  8.46 – 8.37 (m, 2H), 7.50 (dt, *J* = 7.9, 1.9 Hz, 1H), 7.44 (d, *J* = 7.3 Hz, 2H), 7.34 – 7.07 (m, 14H), 5.08 (dd, *J* = 10.2, 1.5 Hz, 1H), 3.84 (d, *J* = 13.3 Hz, 2H), 3.36 (s, 3H), 3.25 (dd, *J* = 10.1, 7.0 Hz, 1H), 3.19 (d, *J* = 13.3 Hz, 2H), 3.11 (s, 3H), 3.03 – 2.92 (m, 3H), 2.47 – 2.38 (m, 1H), 0.11 (d, *J* = 6.9 Hz, 3H).



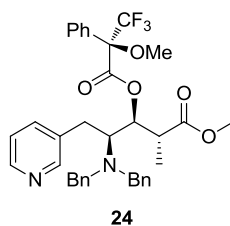

**R-Mosher ester 24:** To a stirred solution of (2*R*)-3,3,3-trifluoro-2-methoxy-2-phenylpropanoic acid (6.00 mg, 25.6  $\mu$ mol, 2.10 eq.), Et<sub>3</sub>N (3.73  $\mu$ l, 26.8  $\mu$ mol, 2.20 eq.), and DMAP (3.30 mg, 26.8  $\mu$ mol, 2.20 eq.) in 50  $\mu$ l toluene were added 2,4,6-trichlorobenzoyl chloride (4.00  $\mu$ l, 25.6  $\mu$ mol, 2.10 eq.) and a solution of **22** (5.10 mg, 12.2  $\mu$ mol, 1.00 eq.) dissolved in 100  $\mu$ l toluene at RT. The white slurry was stirred at RT for 6 h and was heated to 45 °C for 18 h. The yellow mixture was concentrated *in vacuo* and purified by FC (hexane/EtOAc 1:1) to deliver **24** as a colorless film (0.8 mg, 10%).

**<sup>1</sup>H-NMR:** (400 MHz, CDCl<sub>3</sub>):  $\delta$  8.48 (dd, *J* = 4.8, 1.6 Hz, 1H), 8.35 (t, *J* = 2.8 Hz, 1H), 7.62 (d, *J* = 8.1 Hz, 2H), 7.48 – 7.14 (m, 15H), 5.03 (dd, *J* = 9.9, 2.1 Hz, 1H), 3.75 (d, *J* = 13.5 Hz, 2H), 3.54 (s, 3H), 3.51 (s, 3H), 3.28 – 3.19 (m, 1H), 3.12 (d, *J* = 13.4 Hz, 2H), 2.96 (ddd, *J* = 9.6, 4.0, 2.0 Hz, 1H), 2.80 (dd, *J* = 13.9, 3.7 Hz, 1H), 2.16 (dd, *J* = 14.0, 9.7 Hz, 1H), 0.19 (d, *J* = 6.9 Hz, 3H).

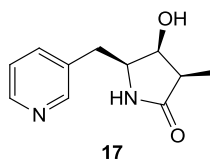

**Lactam 17:** Ester **22** (15.0 mg, 358  $\mu$ mol, 1.00 eq.) was dissolved in 1 mL MeOH and Pd on charcoal (10%, 4.00 mg) was added under Ar. The atmosphere was exchanged with H<sub>2</sub> (1 bar) and the mixture was stirred at RT for 16 h. The suspension was filtered over celite, washed with MeOH and concentrated to yield **17** as a white solid (5.7 mg, 67%). For X-ray crystallography, **17** was crystallized from MeOH at RT by slow evaporation of the solvent.

**R<sub>f</sub>:** 0.15 (CH<sub>2</sub>Cl<sub>2</sub>/MeOH 5%)

**[ $\alpha$ ]<sub>D</sub><sup>20</sup>:** +2.01° (c 0.570, MeOH)

**<sup>1</sup>H-NMR:** (400 MHz, MeOD):  $\delta$  8.51 (d, *J* = 1.7 Hz, 1H), 8.40 (dd, *J* = 4.9, 1.5 Hz, 1H), 7.83 (dt, *J* = 7.7, 1.7 Hz, 1H), 7.39 (dd, *J* = 7.7, 4.9 Hz, 1H), 4.08 – 4.04 (m, 1H), 3.87 (ddd, *J* = 8.9, 6.1, 4.0 Hz, 1H), 3.09 (dd, *J* = 13.6, 8.8 Hz, 1H), 2.91 (dd, *J* = 13.6, 6.1 Hz, 1H), 2.54 (qd, *J* = 7.3, 5.1 Hz, 1H), 1.13 (d, *J* = 7.3 Hz, 3H).

**<sup>13</sup>C-NMR:** (100 MHz, DMSO-d<sub>6</sub>):  $\delta$  177.2, 150.3, 147.3, 136.7, 134.0, 123.3, 69.5, 58.3, 42.5, 31.7, 8.4.

**IR:** (neat, cm<sup>-1</sup>): 3246, 2934, 1679, 1579, 1426, 1335, 1255, 1137, 1027, 994, 714, 638, 404.

**HR-MS:** (ESI): *m/z* calc. for C<sub>11</sub>H<sub>15</sub>N<sub>2</sub>O<sub>2</sub> [M+H]<sup>+</sup> 207.1128, found 207.1132.

### 3. Synthesis of Building Blocks 6 and *epi*-6

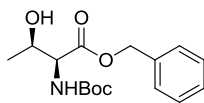

9

**Protected L-Thr 9:** L-Thr (2.55 g, 21.4 mmol, 1.00 eq.) was dissolved in 75 mL 50% THF/H<sub>2</sub>O. Na<sub>2</sub>CO<sub>3</sub> (4.78 g, 45.1 mmol, 2.10 eq.) in 20 mL H<sub>2</sub>O was added and the mixture was stirred at RT for 10 min. Boc<sub>2</sub>O (5.92 mL, 25.8 mmol, 1.20 eq.) was added and the turbid mixture was stirred at RT for 14 h. It was then diluted with 15 mL H<sub>2</sub>O and the pH was adjusted to 4 (aq. HCl 1 M). The aq. phase was extracted with EtOAc (3 x 15 mL), the pH was lowered to 3 (aq. HCl 1 M), NaCl was added to saturation and the aq. phase was again extracted with EtOAc (4 x 20 mL). The combined org. extracts were dried over MgSO<sub>4</sub> and concentrated *in vacuo* to yield L-Boc-Thr (3.79 g, 81% crude) as a colorless foam. The protected amino acid (3.79 g, 17.3 mmol, 1.00 eq.) and benzyl bromide (1.63 mL, 18.9 mmol, 1.05 eq.) were dissolved in 100 mL DMF at 0 °C. Cs<sub>2</sub>CO<sub>3</sub> (2.93 g, 8.99 mmol, 0.52 eq.) was added and the suspension was stirred at RT for 20 h. H<sub>2</sub>O (15 mL) was added and the mixture was extracted with EtOAc (3 x 20 mL). The combined org. extracts were washed with H<sub>2</sub>O (1 x 10 mL) and brine (2 x 10 mL), dried over MgSO<sub>4</sub> and concentrated *in vacuo*. The resulting oil was purified by FC (hexane/EtOAc 9:1 → 3:2) to deliver **9** as a colorless oil (4.59 g, 86%).

**R<sub>f</sub>:** 0.31 (hexane/EtOAc 9:1)  
**[α]<sub>D</sub><sup>20</sup>:** -14.45° (c 1.05, CHCl<sub>3</sub>) (Lit.: -19.6°, C. W. Mosher and L. Goodman, *J. Org. Chem.* **1972**, 37, 2928-2933)  
**<sup>1</sup>H-NMR:** (400 MHz, CDCl<sub>3</sub>): δ 7.37-7.34 (m, 5H), 5.33 (br s, 1H, NH), 5.20 (q, *J* = 11.3 Hz, 2H), 4.35-4.27 (m, 2H), 2.07 (br s, 1H, OH), 1.44 (s, 9H), 1.23 (d, *J* = 6.32 Hz, 3H).  
**<sup>13</sup>C-NMR:** (100 MHz, CDCl<sub>3</sub>): δ 171.3, 156.1, 128.6, 128.6, 128.4, 128.2, 80.1, 68.2, 67.2, 58.8, 28.3, 19.9.  
**IR:** (neat, cm<sup>-1</sup>): 3437, 2978, 2934, 1743, 1715, 1692, 1500, 1456, 1367, 1253, 1160, 112, 1066, 1000, 880, 752, 736, 698.  
**HR-MS:** (ESI): *m/z* calc. for C<sub>16</sub>H<sub>23</sub>NNaO<sub>5</sub> [M+Na]<sup>+</sup> 332.1468, found 332.1471

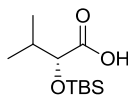

8

**(R)-TBS-protected alcohol 8:** The compound was prepared according to I. Gonzáles *et al.*, *J. Chem. Soc., Perkin Trans. 1*, **1996**, 1427-1433 while the analytics are compared to: M. Kusakabe *et al.*, *J. Org. Chem.* **1989**, 54, 2085-2091. (*R*)-2-Hydroxy-3-methylbutyric acid (305 mg, 2.58 mmol, 1.00 eq.), TBS-Cl (934 mg, 6.20 mmol, 2.40 eq.) and imidazole (1.07 g, 12.4 mmol, 4.80 eq) were dissolved in 3.5 mL DMF at RT and the mixture was stirred for 24 h. It was then diluted with EtOAc (65 mL), washed with

sat. aq. citric acid, sat. aq. NaHCO<sub>3</sub> and brine (3 x 10 mL each), dried over MgSO<sub>4</sub> and concentrated. The resulting oil was dissolved in 22 mL MeOH and the solution was cooled to 0 °C. 650 mg K<sub>2</sub>CO<sub>3</sub> in 8 mL H<sub>2</sub>O were added and the mixture was stirred at RT for 2.5 h. The solution was adjusted to pH 4 (aq. HCl 1 M) and the aq. phase was extracted with EtOAc (3 x 10 mL). The combined org. extracts were dried over MgSO<sub>4</sub> and concentrated *in vacuo*. The colorless oil was purified by FC (hexane/EtOAc 6:1 → 4:1) to deliver **8** as a colorless oil (339 mg, 57% over 2 steps).

**R<sub>f</sub>**: 0.25 (10% MeOH in CH<sub>2</sub>Cl<sub>2</sub>)  
**[α]<sub>D</sub><sup>20</sup>**: +18.31° (c 0.942, CH<sub>2</sub>Cl<sub>2</sub>)  
**<sup>1</sup>H-NMR**: (400 MHz, CDCl<sub>3</sub>) δ 4.05 (d, *J* = 4.0 Hz, 1H), 2.16 – 2.01 (m, 1H), 0.97 (d, *J* = 6.9 Hz, 3H), 0.95 – 0.91 (m, 12H), 0.09 (s, 6H).  
**<sup>13</sup>C-NMR**: (101 MHz, CDCl<sub>3</sub>) δ 176.9, 76.7, 32.8, 25.7, 18.8, 16.7, -5.2.  
**HR-MS**: (ESI): *m/z* calc. for C<sub>11</sub>H<sub>23</sub>O<sub>3</sub>Si [M-H]<sup>-</sup> 231.1422, found 231.1424.

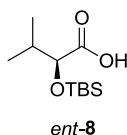

**(S)-TBS-protected alcohol *ent*-8**: The compound was prepared according to I. González *et al.*, *J. Chem. Soc., Perkin Trans. 1*, **1996**, 1427-1433. (*S*)-2-Hydroxy-3-methylbutyric acid (1.04 g, 8.80 mmol, 1.00 eq.), TBS-Cl (3.19 g, 21.1 mmol, 2.40 eq.) and imidazole (3.64 g, 42.3 mmol, 4.80 eq) were dissolved in 11 mL DMF at RT and the solution was stirred for 24 h. The mixture was diluted with EtOAc (200 mL), washed with sat. aq. citric acid, sat. aq. NaHCO<sub>3</sub> and brine (3 x 40 mL each), dried over MgSO<sub>4</sub> and concentrated *in vacuo*. The resulting oil was dissolved in 70 mL MeOH and the solution was cooled to 0 °C. 2 g K<sub>2</sub>CO<sub>3</sub> in 24 mL H<sub>2</sub>O were added and the mixture was stirred at RT for 2.5 h. The pH of the solution was adjusted to 4 (aq. HCl 1 M) and the aq. phase was extracted with EtOAc (3 x 20 mL). The combined org. extracts dried over MgSO<sub>4</sub> and concentrated *in vacuo*. The colorless oil was purified by FC (hexane/EtOAc 6:1 → 4:1) to deliver *ent*-**8** as a colorless oil (1.54 g, 75% over 2 steps).

**R<sub>f</sub>**: 0.28 (10% MeOH in CH<sub>2</sub>Cl<sub>2</sub>)  
**[α]<sub>D</sub><sup>20</sup>**: -16.45° (c 0.811, CH<sub>2</sub>Cl<sub>2</sub>)  
**<sup>1</sup>H-NMR**: (400 MHz, CDCl<sub>3</sub>): δ 10.09 (br. s, 1H), 4.06 (d, *J* = 4.0 Hz, 1H), 2.14-2.04 (m, 1H), 0.98 (d, *J* = 6.2 Hz, 3H), 0.94-0.93 (m, 12H, overlapping signals), 0.09 (s, 6H).  
**<sup>13</sup>C-NMR**: (100 MHz, CDCl<sub>3</sub>): δ 176.8, 76.7, 32.8, 25.7, 18.7, 18.2, 16.7, -5.2.  
**HR-MS**: (ESI): *m/z* calc. for C<sub>11</sub>H<sub>23</sub>O<sub>3</sub>Si [M-H]<sup>-</sup> 231.1422, found 231.1426.

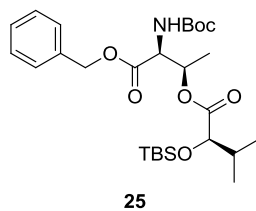

**(R)-TBS-ether 25:** To a stirred solution of **8** (250 mg, 1.08 mmol, 1.00 eq.) and Et<sub>3</sub>N (449 μl, 3.23 mmol, 3.00 eq.) in 10 mL toluene was added 2,4,6-trichlorobenzoyl chloride (210 μl, 1.35 mmol, 1.25 eq.). As the mixture became turbid (white precipitate) a solution of **9** (350 mg, 1.13 mmol, 1.05 eq.) in 5 mL toluene and DMAP (263 mg, 2.15 mmol, 2.00 eq.) was added at RT. The yellow slurry was stirred at RT for 18 h. Sat. aq. NaHCO<sub>3</sub> (3 mL) was added and the aq. phase was extracted with EtOAc (3 x 10 mL). The combined org. extracts were dried over MgSO<sub>4</sub> and concentrated *in vacuo*. The yellow residue was purified by FC (hexane/EtOAc 9.5:1) to deliver **25** as a colorless oil (411 mg, 73%).

**R<sub>f</sub>:** 0.36, (hexane/EtOAc 9.5:1)

**[α]<sub>D</sub><sup>20</sup>:** +44.4° (c 1.41, CHCl<sub>3</sub>)

**<sup>1</sup>H-NMR:** (400 MHz, CDCl<sub>3</sub>) δ 7.39 – 7.29 (m, 5H), 5.48 (qd, *J* = 6.3, 2.5 Hz, 1H), 5.23 – 5.13 (m, 2H), 5.04 (d, *J* = 12.2 Hz, 1H), 4.46 (dd, *J* = 9.7, 2.4 Hz, 1H), 3.93 (d, *J* = 4.1 Hz, 1H), 2.00 – 1.89 (m, 1H), 1.46 (s, 9H), 1.30 (d, *J* = 6.4 Hz, 3H), 0.92 (s, 12H), 0.82 (d, *J* = 6.8 Hz, 3H), 0.03 (d, *J* = 6.7 Hz, 6H).

**<sup>13</sup>C-NMR:** (100 MHz, CDCl<sub>3</sub>) δ 172.2, 170.0, 155.9, 134.9, 128.6, 128.5, 128.4, 80.3, 76.5, 70.9, 67.6, 57.3, 32.7, 28.3, 25.7, 19.2, 18.3, 17.1, 16.4, -4.9, -5.4.

**IR:** (neat, cm<sup>-1</sup>): 3027, 2934, 2805, 1715, 1496, 1455, 1423, 1302, 1266, 1208, 1129, 1075, 1048, 1027, 981, 751, 700, 500, 471, 435.

**HR-MS:** (ESI): *m/z* calc. for C<sub>27</sub>H<sub>45</sub>NNaO<sub>7</sub>Si [M+Na]<sup>+</sup> 546.2858, found 546.2857.

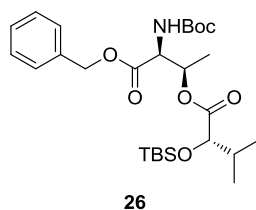

**(S)-TBS-ether 26:** To a stirred solution of *ent*-**8** (70.5 mg, 303 μmol, 1.00 eq.), Et<sub>3</sub>N (169 μl, 1.21 mmol, 4.00 eq.) and DMAP (74.1 mg, 607 μmol, 2.00 eq.) in 2 mL toluene was added 2,4,6-trichlorobenzoyl chloride (71.2 μl, 455 μmol, 1.50 eq.). As the mixture became turbid (white precipitate) a solution of **9** (98.7 mg, 319 μmol, 1.05 eq.) dissolved in 2 mL toluene was added at RT. The yellow slurry was stirred at RT for 18 h. Sat. aq. NaHCO<sub>3</sub> (1 mL) was added and the aq. phase was extracted with EtOAc (3 x 5 mL). The combined org. extracts were dried over MgSO<sub>4</sub> and concentrated *in vacuo*. The yellow residue was purified by FC (hexane/EtOAc 9.5:1) to deliver **26** as a colorless oil (106 mg, 67%).

**R<sub>f</sub>:** 0.41 (hexane/EtOAc 9.5:1)

**[α]<sub>D</sub><sup>20</sup>:** +1.43 (c 1.36, CHCl<sub>3</sub>)

**<sup>1</sup>H-NMR:** (400 MHz, CDCl<sub>3</sub>): δ 7.42 – 7.28 (m, 5H), 5.54 – 5.44 (m, 1H), 5.20 (d, *J* = 9.8 Hz, 1H), 5.16 (d, *J* = 12.2 Hz, 1H), 5.05 (d, *J* = 12.2 Hz, 1H), 4.47 (dd, *J* = 9.8, 1.7 Hz, 1H), 3.94 (d, *J* = 4.2 Hz, 1H), 2.03 – 1.92 (m, 1H), 1.45 (s, 9H), 1.30 (d, 3H), 0.92 – 0.90 (m, 12H, overlapping signals), 0.83 (d, *J* = 6.8 Hz, 3H), 0.03 (d, *J* = 6.8 Hz, 6H).

**<sup>13</sup>C-NMR:** (101 MHz, CDCl<sub>3</sub>): δ 172.2, 169.9, 155.9, 135.0, 128.6, 128.5, 128.4, 80.2, 76.6, 70.9, 67.6, 57.3, 32.8, 28.3, 25.7, 19.1, 18.2, 17.0, 16.5, -4.9, -5.4.

**IR:** (neat, cm<sup>-1</sup>): 2959, 2931, 2858, 1751, 1722, 1500, 1457, 1386, 1367, 1314, 1251, 1163, 1143, 1112, 1083, 1066, 980, 861, 835, 778, 751, 678.

**HR-MS:** (ESI): *m/z* calc. for C<sub>27</sub>H<sub>46</sub>NO<sub>7</sub>Si [M+H]<sup>+</sup> 524.3038, found 524.3043.

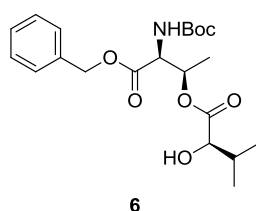

**Alcohol 6:** To a solution of **25** (378 mg, 722 μmol, 1.00 eq.) in 10 mL THF was added HF•py (30%, 3.1 mL in 2 portions) at 0 °C. The solution was stirred at RT for 16 h. The reaction was quenched with sat. aq. NaHCO<sub>3</sub> (50 mL) and the solution extracted with EtOAc (3 x 15 mL). The combined org. extracts were dried over MgSO<sub>4</sub> and concentrated *in vacuo*. The residue was purified by FC (hexane/EtOAc 4:1) to yield **6** as a colorless oil (254 mg, 86%).

**R<sub>f</sub>:** 0.23 (hexane/EtOAc 4:1)

**[α]<sub>D</sub><sup>20</sup>:** +29.2° (c 0.765, CHCl<sub>3</sub>)

**<sup>1</sup>H-NMR:** (400 MHz, CDCl<sub>3</sub>): δ 7.40 – 7.30 (m, 5H), 5.49 (qd, *J* = 6.2, 2.5 Hz, 1H), 5.24 – 5.13 (m, 2H), 5.07 (d, *J* = 12.1 Hz, 1H), 4.52 (dd, *J* = 9.6, 2.4 Hz, 1H), 3.96 (dd, *J* = 5.9, 3.2 Hz, 1H), 2.56 (d, *J* = 6.1 Hz, 1H), 2.01 – 1.89 (m, 1H), 1.46 (s, 9H), 1.33 (d, *J* = 6.4 Hz, 3H), 0.99 (d, *J* = 6.9 Hz, 3H), 0.76 (d, *J* = 6.8 Hz, 3H).

**<sup>13</sup>C-NMR:** (101 MHz, CDCl<sub>3</sub>): δ 173.8, 169.8, 155.8, 134.8, 128.7, 128.7, 128.4, 80.5, 75.1, 72.5, 67.8, 57.1, 31.9, 28.3, 18.9, 16.9, 15.5.

**IR:** (neat, cm<sup>-1</sup>): 3460, 2974, 2936, 1740, 1717, 1501, 1456, 1384, 1368, 1346, 1315, 1282, 1248, 1213, 1164, 1136, 1085, 1063, 1031, 997, 698.

**HR-MS:** (ESI): *m/z* calc. for C<sub>21</sub>H<sub>31</sub>NNaO<sub>7</sub> [M+Na]<sup>+</sup> 432.1993, found 432.1984.

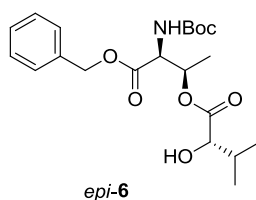

**Alcohol *epi*-6:** To a solution of **26** (460 mg, 878 μmol, 1.00 eq.) in 12 mL THF was added HF•py (30%, 2 mL in 2 portions) at 0 °C. The solution was stirred at RT for 1 h. More HF•py (30%, 1 mL) was added and the mixture was stirred at RT for 16 h. It was then quenched with sat. aq. NaHCO<sub>3</sub> (55 mL) and extracted with EtOAc (3 x 15 mL). The combined org. extracts were dried over MgSO<sub>4</sub> and

concentrated *in vacuo*. The residue was purified by FC (hexane/EtOAc 4:1) to yield *epi-6* as a colorless oil (344 mg, 96%).

**R<sub>f</sub>:** 0.21 (hexane/EtOAc 4:1)  
**[α]<sub>D</sub><sup>20</sup>:** +2.58° (c 1.91, CHCl<sub>3</sub>)  
**<sup>1</sup>H-NMR:** (400 MHz, CDCl<sub>3</sub>): δ 7.41 – 7.29 (m, 5H), 5.50 (dd, *J* = 6.3, 2.2 Hz, 1H), 5.23 – 5.05 (m, 3H), 4.52 (dd, *J* = 9.6, 2.0 Hz, 1H), 3.76 (dd, *J* = 5.8, 3.4 Hz, 1H), 2.49 (d, *J* = 5.9 Hz, 1H), 1.98 (qd, *J* = 6.9, 3.4 Hz, 1H), 1.46 (s, 9H), 1.30 (d, *J* = 6.4 Hz, 3H), 0.98 (d, *J* = 6.9 Hz, 3H), 0.80 (d, *J* = 6.8 Hz, 3H).  
**<sup>13</sup>C-NMR:** (100 MHz, CDCl<sub>3</sub>): δ 173.8, 169.8, 155.8, 135.0, 128.7, 128.6, 128.5, 80.5, 74.5, 72.1, 67.7, 57.1, 31.9, 28.3, 18.8, 16.8, 15.7.  
**IR:** (neat, cm<sup>-1</sup>): 3449, 2971, 2936, 1739, 1716, 1500, 1456, 1384, 1367, 1316, 1248, 1213, 1163, 1083, 1062, 1031, 996, 753, 698.  
**HR-MS:** (ESI): *m/z* calc. for C<sub>21</sub>H<sub>31</sub>NNaO<sub>7</sub> [M+Na]<sup>+</sup> 432.1993, found 432.1998.

#### 4. Synthesis of Analogs 2 and 3

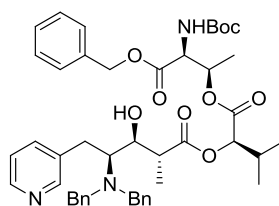

19

**Ester 19:** To a stirred solution of **5** (40.0 mg, 98.9 μmol, 1.00 eq.) and 2,4,6-trichlorobenzoyl chloride (27.1 μl, 173 μmol, 1.75 eq.) in 0.6 mL THF was added Et<sub>3</sub>N (41.2 μl, 297 μmol, 3.00 eq.) at -78 °C. The mixture was stirred for 5 min and a solution of **6** (44.5 mg, 109 μmol, 1.10 eq.) and DMAP (15.7 mg, 129 μmol, 1.30 eq.) in 0.5 mL toluene was added at -78 °C. The clear solution was stirred at -78 °C for 30 min and then slowly warmed to -35 °C. The turbid mixture was stirred at that temperature for 43 h and allowed to warm to 0 °C for the last 25 min. The reaction was quenched at 0 °C with sat. aq. NaHCO<sub>3</sub> (2 mL). The aq. phase was extracted with EtOAc (3 x 10 mL) and the combined org. extracts were dried over MgSO<sub>4</sub> and concentrated *in vacuo*. The yellow oil was purified by FC (hexane/EtOAc 3:2) to yield **19** as a colorless film (43.0 mg, 50%).

**R<sub>f</sub>:** 0.24 (hexane/EtOAc 3:2)  
**[α]<sub>D</sub><sup>20</sup>:** +49.3° (c 1.12, CHCl<sub>3</sub>)  
**<sup>1</sup>H-NMR:** (400 MHz, CDCl<sub>3</sub>): δ 8.45 (d, *J* = 1.7 Hz, 1H), 8.35 (dd, *J* = 4.7, 1.2 Hz, 1H), 7.51 (dt, *J* = 7.7, 1.7 Hz, 1H), 7.28 – 7.05 (m, 16H), 5.62 (d, *J* = 10.0 Hz, 1H), 5.46 (qd, *J* = 6.2, 2.5 Hz, 1H), 5.01 (d, *J* = 12.1 Hz, 1H), 4.93 (d, *J* = 12.1 Hz, 1H), 4.57 (d, *J* = 3.8 Hz, 1H), 4.40 (dd, *J* = 10.0, 2.4 Hz, 1H), 4.16 (br. s, 2H), 3.82 (d, *J* = 4.0 Hz, 1H), 3.39 – 3.26 (m, 3H), 3.22 – 2.97 (m, 3H), 2.77 – 2.64 (m, 1H), 2.10 (qd, *J* = 10.6, 6.8 Hz, 1H), 1.30 (s, 9H), 1.11 (d, *J* = 6.4 Hz, 3H), 0.87 (d, *J* = 6.9 Hz, 3H), 0.83 (d, *J* = 6.8 Hz, 3H), 0.16 (d, *J* = 6.8 Hz, 3H).

**<sup>13</sup>C-NMR:** (100 MHz, CDCl<sub>3</sub>): δ 175.8, 170.4, 169.0, 156.1, 150.8, 147.6, 140.1, 137.1, 135.8, 134.8, 129.5, 128.6, 128.5, 128.3, 127.1, 123.5, 80.2, 76.6, 73.9, 72.1, 68.0, 59.3, 57.2, 56.0, 42.1, 30.2, 28.3, 27.3, 18.9, 16.8, 16.8, 13.0.

**IR:** (neat, cm<sup>-1</sup>): 3489, 2974, 2936, 2359, 1739, 1717, 1497, 1455, 1367, 1316, 1248, 1217, 1162, 1129, 1086, 1061, 987, 943, 753, 700.

**HR-MS:** (ESI): *m/z* calc. for C<sub>46</sub>H<sub>58</sub>N<sub>3</sub>O<sub>9</sub> [M+H]<sup>+</sup> 796.4168, found 796.4166.

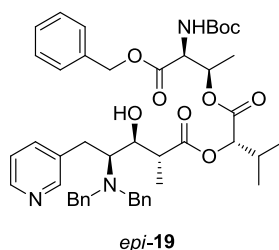

**Ester *epi-19*:** To a stirred solution of **5** (34.0 mg, 84.1 μmol, 1.00 eq.) and 2,4,6-trichlorobenzoyl chloride (23.0 μl, 147 μmol, 1.75 eq.) in 0.5 mL THF was added Et<sub>3</sub>N (35.1 μl, 252 μmol, 3.00 eq.) at -78 °C. The mixture was stirred for 5 min and a solution of *epi-6* (37.9 mg, 92.5 μmol, 1.10 eq.) and DMAP (13.4 mg, 109 μmol, 1.30 eq.) in 0.4 mL toluene was added at -78 °C. The clear solution was stirred at -78 °C for 30 min and then slowly warmed to -35 °C. The turbid mixture was stirred at that temperature for 45 h and then allowed to warm to 0 °C for the last 25 min. The reaction was quenched at 0 °C with sat. aq. NaHCO<sub>3</sub> (2 mL). The aq. phase was extracted with EtOAc (3 x 10 mL) and the combined org. extracts were dried over MgSO<sub>4</sub> and concentrated *in vacuo*. The yellow oil was purified by FC (hexane/EtOAc 3:2) to yield *epi-19* as a colorless film (47.1 mg, 64%).

**R<sub>f</sub>:** 0.21 (hexane/EtOAc 3:2)

**[α]<sub>D</sub><sup>20</sup>:** +45.0° (c 0.960, CHCl<sub>3</sub>)

**<sup>1</sup>H-NMR:** (400 MHz, CDCl<sub>3</sub>): δ 8.42 (d, *J* = 1.7 Hz, 1H), 8.32 (dd, *J* = 4.8, 1.6 Hz, 1H), 7.50 – 7.43 (m, 1H), 7.27 – 7.03 (m, 16H), 5.43 – 5.33 (m, 1H), 5.25 (d, *J* = 9.5 Hz, 1H), 5.02 (d, *J* = 12.0 Hz, 1H), 4.93 (d, *J* = 12.0 Hz, 1H), 4.64 (d, *J* = 3.9 Hz, 1H), 4.37 (dd, *J* = 9.6, 2.5 Hz, 1H), 4.13 (d, *J* = 12.1 Hz, 2H), 3.62 (d, *J* = 4.0 Hz, 1H), 3.38 – 3.27 (m, 3H), 3.16 – 2.99 (m, 3H), 2.69 (dd, *J* = 8.4, 4.2 Hz, 1H), 2.07 – 1.92 (m, 1H), 1.30 (s, 9H), 1.13 (d, *J* = 6.4 Hz, 3H), 0.74 (d, *J* = 6.9 Hz, 3H), 0.67 (d, *J* = 6.8 Hz, 3H), 0.22 (d, *J* = 6.9 Hz, 3H).

**<sup>13</sup>C-NMR:** (100 MHz, CDCl<sub>3</sub>) δ 174.5, 169.7, 169.6, 155.9, 150.7, 147.5, 140.0, 136.9, 136.0, 134.8, 129.3, 128.6, 128.5, 128.4, 127.1, 123.4, 80.3, 75.6, 73.7, 72.4, 68.0, 58.8, 57.1, 55.8, 43.7, 29.9, 28.3, 26.9, 18.6, 16.7, 16.6, 13.2.

**IR:** (neat, cm<sup>-1</sup>): 2975, 2935, 1736, 1497, 1455, 1423, 1368, 1311, 1251, 1215, 1164, 1129, 1086, 1062, 1028, 985, 937, 752, 700.,

**HR-MS:** (ESI): *m/z* calc. for C<sub>46</sub>H<sub>58</sub>N<sub>3</sub>O<sub>9</sub> [M+H]<sup>+</sup> 796.4168, found 796.4163.

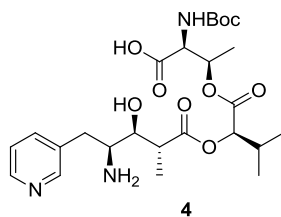

**Amino acid 4:** To a solution of **19** (41.2 mg, 51.8  $\mu\text{mol}$ , 1.00 eq.) in 1 mL MeOH was added Pd on charcoal (10%, 22.0 mg, 20.7  $\mu\text{mol}$ , 0.400 eq.) under Ar. The Ar was exchanged for H<sub>2</sub> (1 bar) and the mixture was stirred at RT for 5 h. The suspension was filtered through celite, the filter cake was washed with MeOH, and the filtrate was concentrated *in vacuo* to yield **4** as a white solid which was used crude in the next step (27.6 mg, quant.).

**$[\alpha]_D^{20}$ :** +15.3° (c 1.32, MeOH)

**<sup>1</sup>H-NMR:** (400 MHz, D<sub>2</sub>O):  $\delta$  8.82 (d,  $J$  = 1.4 Hz, 1H), 8.78 (d,  $J$  = 5.6 Hz, 1H), 8.65 – 8.58 (m, 1H), 8.10 (dd,  $J$  = 8.0, 5.9 Hz, 1H), 5.61 – 5.44 (m, 1H), 4.96 (d,  $J$  = 4.2 Hz, 1H), 4.34 (d,  $J$  = 2.9 Hz, 1H), 4.09 – 3.99 (m, 1H), 3.88 (t,  $J$  = 5.7 Hz, 1H), 3.53 (dd,  $J$  = 15.0, 6.0 Hz, 1H), 3.27 (dd,  $J$  = 15.0, 8.7 Hz, 1H), 3.07 (p,  $J$  = 6.9 Hz, 1H), 2.28 – 2.15 (m, 1H), 1.45 (s, 9H), 1.33 (d,  $J$  = 6.4 Hz, 3H), 1.26 (d,  $J$  = 7.0 Hz, 3H), 0.95 (d,  $J$  = 6.9 Hz, 3H), 0.88 (d,  $J$  = 6.8 Hz, 3H).

**<sup>13</sup>C-NMR:** (100 MHz, D<sub>2</sub>O):  $\delta$  174.7, 174.1, 170.7, 158.0, 147.6, 141.8, 140.8, 136.0, 127.7, 81.7, 77.8, 73.1, 71.4, 57.9, 53.3, 42.0, 32.5, 29.8, 27.6, 17.8, 16.3, 16.1, 13.4.

**IR:** (neat, cm<sup>-1</sup>): 3362, 2974, 2935, 2881, 1722, 1505, 1469, 1369, 1311, 1252, 1168, 1129, 1058, 992, 685, 549.

**HR-MS:** (ESI):  $m/z$  calc. for C<sub>25</sub>H<sub>40</sub>N<sub>3</sub>O<sub>9</sub> [M+H]<sup>+</sup> 526.2759, found 526.2756.

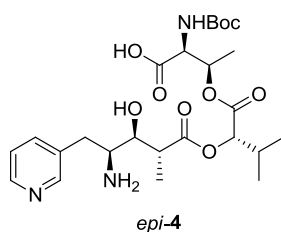

**Amino acid *epi-4*:** To a solution *epi-19* (24.6 mg, 30.9  $\mu\text{mol}$ , 1.00 eq.) in 0.8 mL MeOH was added Pd on charcoal (10%, 13.2 mg, 12.4  $\mu\text{mol}$ , 0.400 eq.) under Ar. The Ar was exchanged for H<sub>2</sub> (1 bar) and the mixture was stirred at RT for 5 h. The suspension was filtered through celite, the filter cake was washed with MeOH, and the filtrate was concentrated *in vacuo* to yield *epi-4* as a white solid which was used crude in the next step (16.4 mg, quant.).

**$[\alpha]_D^{20}$ :** +12.6° (c 1.35, MeOH)

**<sup>1</sup>H-NMR:** (400 MHz, D<sub>2</sub>O)  $\delta$  8.50 (d,  $J$  = 1.7 Hz, 2H), 7.88 (d,  $J$  = 7.9 Hz, 1H), 7.52 (dd,  $J$  = 7.8, 5.0 Hz, 1H), 5.36 (dt,  $J$  = 10.0, 5.9 Hz, 1H), 4.82 – 4.80 (m, 1H), 4.14 – 4.05 (m, 1H), 3.92 – 3.74 (m, 2H), 3.23 (dd,  $J$  = 14.5, 6.9 Hz, 1H), 3.08 (dd,  $J$  = 14.5, 7.6 Hz, 1H), 2.99 (p,  $J$  = 7.0 Hz, 1H), 2.28 – 2.14 (m, 1H), 1.45 – 1.43 (m, 1H), 1.42 (s, 9H), 1.22 (d,  $J$  = 7.1 Hz, 6H), 0.94 (t,  $J$  = 6.4 Hz, 6H).

**<sup>13</sup>C-NMR:** (100 MHz, D<sub>2</sub>O):  $\delta$  175.6, 175.1, 170.6, 157.6, 148.7, 147.5, 139.0, 132.0, 124.9, 81.3, 78.1, 73.9, 70.8, 59.3, 53.5, 42.4, 32.8, 29.7, 27.6, 17.7, 16.6, 16.3, 13.5.

**IR:** (neat, cm<sup>-1</sup>): 3401, 2975, 2937, 1720, 1596, 1501, 1389, 1250, 1171, 1131, 1055, 715.



**HR-MS:** (ESI):  $m/z$  calc. for  $C_{25}H_{40}N_3O_9$   $[M+H]^+$  526.2759, found 526.2752.

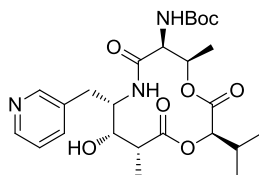

**20**

**Protected amine 20:** To a solution of DIEA (33.9  $\mu$ l, 196  $\mu$ mol, 2.60 eq.) and HATU (48.7 mg, 128  $\mu$ mol, 1.70 eq.) in 30 mL  $CH_2Cl_2$  and 0.3 mL DMF was added a solution of **4** (39.6 mg, 75.3  $\mu$ mol, 1.00 eq.) in 20 mL  $CH_2Cl_2$  and 0.2 mL DMF over a period of 4 h at RT (pale yellow color develops). The solution was stirred at RT for 18 h. Sat. aq.  $NaHCO_3$  (2 mL) was added and the aq. phase was extracted with  $CH_2Cl_2$  (3 x 5 mL). The combined org. extracts were dried over  $MgSO_4$ , concentrated *in vacuo*, and the residue was purified by FC (hexane/EtOAc 0.5:10) to deliver **20** as an orange film (24.1 mg, 63%).

**R<sub>f</sub>:** 0.19 (hexane/EtOAc 05:10)

**$[\alpha]_D^{20}$ :** -24.2° (*c* 1.21, MeOH)

**$^1H$ -NMR:** (400 MHz, MeOD):  $\delta$  8.46 (d,  $J$  = 1.7 Hz, 1H), 8.37 (dd,  $J$  = 4.9, 1.4 Hz, 1H), 7.79 – 7.69 (m, 1H), 7.33 (dd,  $J$  = 7.7, 5.0 Hz, 1H), 5.27 – 5.12 (m, 1H), 4.68 (d,  $J$  = 5.1 Hz, 1H), 4.24 (d,  $J$  = 5.9 Hz, 1H), 4.08 (td,  $J$  = 7.6, 1.6 Hz, 1H), 3.63 (s, 1H), 3.06 – 2.91 (m, 2H), 2.59 (qd,  $J$  = 7.2, 1.0 Hz, 1H), 2.27 – 2.16 (m, 1H), 1.45 (s, 9H), 1.37 (d,  $J$  = 7.4 Hz, 3H), 1.29 (d,  $J$  = 6.5 Hz, 3H), 0.99 (d,  $J$  = 4.2 Hz, 3H), 0.97 (d,  $J$  = 4.0 Hz, 3H).

**$^{13}C$ -NMR:** (100 MHz, MeOD):  $\delta$  178.4, 170.9, 169.3, 157.1, 151.1, 148.0, 139.3, 136.3, 125.0, 81.1, 79.1, 75.7, 70.9, 57.7, 56.8, 42.4, 36.4, 31.1, 28.7, 18.7, 18.0, 17.8, 15.0.

**IR:** (neat,  $cm^{-1}$ ): 3350, 2974, 2935, 1744, 1717, 1673, 1503, 1459, 1388, 1370, 1251, 1169, 1049, 1023, 847, 558.

**HR-MS:** (ESI):  $m/z$  calc. for  $C_{25}H_{38}N_3O_8$   $[M+H]^+$  508.2653, found 508.2662.

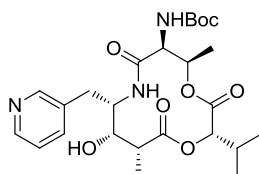

**epi-20**

**Protected amine epi-20:** To a solution of DIEA (23.1  $\mu$ l, 87.3  $\mu$ mol, 2.60 eq.) and HATU (33.2 mg, 87.3  $\mu$ mol, 1.70 eq.) in 20 mL  $CH_2Cl_2$  and 0.2 mL DMF was added a solution of *epi-4* (27.0 mg, 51.4  $\mu$ mol, 1.00 eq.) in 15 mL  $CH_2Cl_2$  and 0.1 mL DMF over a period of 4 h at RT (pale yellow color develops). The solution was stirred at RT for 18 h. Sat. aq.  $NaHCO_3$  (2 mL) was added and the aq. phase was extracted with  $CH_2Cl_2$  (3 x 5 mL). The combined org. extracts were dried over  $MgSO_4$ , concentrated *in vacuo*, and the residue was purified by FC (hexane/EtOAc 0.5:10) to deliver *epi-20* as an orange film (20.5 mg, 79%).

**R<sub>f</sub>:** 0.23 (hexane/EtOAc 05:10)  
**[α]<sub>D</sub><sup>20</sup>:** -44.9° (c 1.03, MeOH)  
**<sup>1</sup>H-NMR:** (400 MHz, MeOD): δ 8.46 (d, *J* = 1.6 Hz, 1H), 8.38 (d, *J* = 3.9 Hz, 1H), 7.78 (d, *J* = 7.8 Hz, 1H), 7.35 (dd, *J* = 7.7, 5.0 Hz, 1H), 4.90 – 4.84 (m, 1H), 4.54 (d, *J* = 2.7 Hz, 1H), 4.35 (d, *J* = 4.6 Hz, 1H), 4.04 (t, *J* = 7.2 Hz, 1H), 3.65 (s, 1H), 3.05 (dd, *J* = 13.6, 6.4 Hz, 1H), 2.95 (dd, *J* = 13.6, 8.0 Hz, 1H), 2.44 (qd, *J* = 7.0, 2.0 Hz, 1H), 2.30 (dq, *J* = 13.5, 6.8 Hz, 1H), 1.45 (s, 9H), 1.31 (d, *J* = 7.2 Hz, 3H), 1.19 (d, *J* = 6.2 Hz, 3H), 1.07 (dd, *J* = 6.8, 4.4 Hz, 6H).  
**<sup>13</sup>C-NMR:** (100 MHz, MeOD): δ 175.5, 173.0, 169.5, 151.1, 148.1, 139.3, 136.2, 130.8, 125.2, 81.2, 79.8, 73.3, 72.1, 57.6, 56.9, 47.5, 37.0, 31.0, 28.7, 19.4, 17.8, 17.2, 13.1.  
**IR:** (neat, cm<sup>-1</sup>): 3423, 2973, 2933, 1722, 1671, 1492, 1369, 1252, 1169, 1051, 1020, 847, 771, 716, 608, 561, 535, 510, 446.  
**HR-MS:** (ESI): *m/z* calc. for C<sub>25</sub>H<sub>38</sub>N<sub>3</sub>O<sub>8</sub> [M+H]<sup>+</sup> 508.2653, found 508.2655.

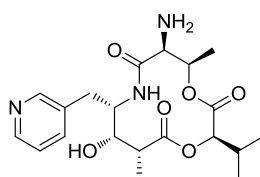

21

**Amine 21:** To a solution of **20** (5.00 mg, 9.90 μmol, 1.00 eq.) in 0.6 mL CH<sub>2</sub>Cl<sub>2</sub> was added TFA (75.4 μL, 985 mmol, 100 eq.) at 0 °C. The solution was stirred at RT for 3 h. The solvents were removed *in vacuo* to deliver **21** as a yellow oil which was used crude in the next step (10.0 mg, quant.).

**[α]<sub>D</sub><sup>20</sup>:** -4.23° (c 0.965, MeOH)  
**<sup>1</sup>H-NMR:** (400 MHz, MeOD): δ 8.78 (s, 1H), 8.71 (d, *J* = 5.2 Hz, 1H), 8.51 – 8.44 (m, 1H), 7.94 (dd, *J* = 7.9, 5.7 Hz, 1H), 5.37 – 5.27 (m, 1H), 4.67 (d, *J* = 6.0 Hz, 1H), 4.32 (td, *J* = 7.2, 1.8 Hz, 1H), 4.04 (d, *J* = 5.7 Hz, 1H), 3.67 (t, *J* = 1.6 Hz, 1H), 3.24 (dd, *J* = 13.9, 7.0 Hz, 1H), 3.13 (dd, *J* = 13.9, 7.6 Hz, 1H), 2.65 (qd, *J* = 7.3, 1.2 Hz, 1H), 2.28 – 2.16 (m, 1H), 1.42 (d, *J* = 6.5 Hz, 3H), 1.38 (d, *J* = 7.4 Hz, 3H), 1.01 (d, *J* = 4.7 Hz, 3H), 0.99 (d, *J* = 4.8 Hz, 3H).  
**<sup>13</sup>C-NMR:** (100 MHz, MeOD): δ 178.6, 169.0, 166.9, 147.1, 144.7, 142.3, 130.8, 127.8, 79.6, 75.0, 69.0, 57.4, 55.3, 42.2, 36.8, 30.9, 18.5, 17.9, 17.7, 15.1.  
**IR:** (neat, cm<sup>-1</sup>): 3358, 2971, 2935, 1745, 1672, 1537, 1472, 1392, 1263, 1173, 1138, 1056, 837, 798, 723, 706, 600, 549, 508, 469, 458.  
**HR-MS:** (ESI): *m/z* calc. for C<sub>20</sub>H<sub>30</sub>N<sub>3</sub>O<sub>6</sub> [M+H]<sup>+</sup> 408.2129, found 408.2138.

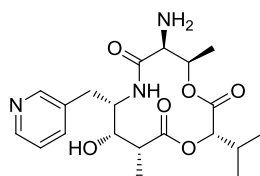

*epi-21*

**Amine *epi-21*:** To a solution of *epi-20* (20.5 mg, 40.4  $\mu\text{mol}$ , 1.00 eq.) in 2 mL  $\text{CH}_2\text{Cl}_2$  was added TFA (309  $\mu\text{l}$ , 4.04 mmol, 100 eq.) at 0 °C. The solution was stirred at RT for 2.4 h. The solvents were removed *in vacuo* to deliver *epi-21* as a pale yellow oil which was used crude in the next step (22.0 mg, quant.).

**$[\alpha]_D^{20}$ :** -39.9° (*c* 0.820, MeOH)

**$^1\text{H-NMR}$ :** (400 MHz, MeOD):  $\delta$  8.83 (s, 1H), 8.74 (d,  $J = 5.6$  Hz, 1H), 8.57 (d,  $J = 8.1$  Hz, 1H), 8.01 (dd,  $J = 8.0, 5.8$  Hz, 1H), 5.11 – 5.01 (m, 1H), 4.55 (d,  $J = 3.0$  Hz, 1H), 4.30 (dd,  $J = 12.6, 6.4$  Hz, 1H), 4.22 (d,  $J = 4.8$  Hz, 1H), 3.79 (d,  $J = 1.9$  Hz, 1H), 3.25 (dd,  $J = 13.8, 7.1$  Hz, 1H), 3.17 (dd,  $J = 13.9, 7.1$  Hz, 1H), 2.57 (qd,  $J = 7.1, 2.3$  Hz, 1H), 2.30 (dq,  $J = 13.3, 6.7$  Hz, 1H), 1.34 (d,  $J = 7.2$  Hz, 3H), 1.28 (d,  $J = 6.0$  Hz, 3H), 1.12 – 0.99 (m, 6H).

**$^{13}\text{C-NMR}$ :** (100 MHz, MeOD):  $\delta$  175.4, 169.0, 166.4, 148.9, 143.3, 140.8, 140.6, 128.2, 79.7, 73.8, 70.2, 56.0, 55.7, 37.9, 36.5, 31.0, 19.3, 17.8, 16.9, 13.0.

**IR:** (neat,  $\text{cm}^{-1}$ ): 2973, 2933, 1735, 1673, 1526, 1473, 1282, 1201, 1135, 1069, 837, 798, 757, 722, 483, 470, 458, 444, 409.

**HR-MS:** (ESI):  $m/z$  calc. for  $\text{C}_{20}\text{H}_{29}\text{N}_3\text{NaO}_6$   $[\text{M}+\text{Na}]^+$  430.1949, found 430.1938.

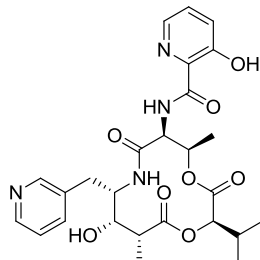

**2**

**Dihydropyridomycin **2**:** To a solution of 3-hydroxypyridine-2-carboxylic acid (1.50 mg, 10.8  $\mu\text{mol}$ , 1.10 eq.), HATU (4.48 mg, 11.8  $\mu\text{mol}$ , 1.20 eq.) and DIEA (5.10  $\mu\text{l}$ , 29.5  $\mu\text{mol}$ , 3.00 eq.) in 100  $\mu\text{l}$  MeCN was added a solution of **21** (4.00 mg, 9.82  $\mu\text{mol}$ , 1.00 eq.) in 0.4 mL MeCN at RT. The mixture was stirred at RT for 18 h. The mixture was diluted with  $\text{CH}_2\text{Cl}_2$  (1 mL) and sat. aq.  $\text{NaHCO}_3$  (0.5 mL). The aq. phase was extracted with  $\text{CH}_2\text{Cl}_2$  (3 x 2 mL) and the combined org. extracts were dried over  $\text{MgSO}_4$  and concentrated *in vacuo*. The remaining green oil was purified by FC ( $\text{CH}_2\text{Cl}_2/\text{MeOH}$  5%) to yield **2** as a colorless film (2.7 mg, 52% over 2 steps). The samples prepared for biological testing were purified by reversed phase HPLC (Symmetry® C18 5  $\mu\text{m}$  19x100 mm column, gradient: 30% → 100% MeCN in  $\text{H}_2\text{O}$  in 14 min, flow: 25 mL/min, room temperature,  $t_R = 6.88$  min) to a purity >98%.

**$R_f$ :** 0.25 ( $\text{CH}_2\text{Cl}_2/\text{MeOH}$  5%)

**$[\alpha]_D^{20}$ :** -29.7° (*c* 0.110, MeOH)

**<sup>1</sup>H-NMR:** (500 MHz, DMSO-d<sub>6</sub>): δ 11.80 (s, 1H), 8.37 (d, *J* = 1.8 Hz, 1H), 8.30 (d, *J* = 4.7 Hz, 1H), 8.21 – 8.16 (m, 2H), 8.10 (d, *J* = 9.4 Hz, 1H), 7.58 (dd, *J* = 8.5, 4.4 Hz, 1H), 7.55 (dt, *J* = 7.8, 1.9 Hz, 1H), 7.46 (dd, *J* = 8.5, 1.3 Hz, 1H), 7.07 (dd, *J* = 7.7, 4.9 Hz, 1H), 5.29 (p, *J* = 6.4 Hz, 1H), 4.81 – 4.64 (m, 3H), 4.15 – 4.03 (m, 1H), 3.62 (d, *J* = 9.1 Hz, 1H), 2.86 (dd, *J* = 13.5, 6.0 Hz, 1H), 2.77 (dd, *J* = 13.4, 8.7 Hz, 1H), 2.66 – 2.56 (m, 1H), 2.19 – 2.06 (m, *J* = 6.7 Hz, 1H), 1.28 (d, *J* = 7.3 Hz, 3H), 1.21 (d, *J* = 6.5 Hz, 3H), 0.92 (dd, *J* = 6.8, 2.0 Hz, 6H)

**<sup>13</sup>C-NMR:** (126 MHz, DMSO-d<sub>6</sub>): δ 176.2, 168.1, 167.5, 157.7, 150.8, 147.6, 140.6, 137.0, 134.0, 130.8, 130.2, 126.8, 123.4, 77.5, 73.9, 68.8, 56.1, 53.3, 41.4, 35.2, 29.8, 18.5, 17.7, 17.4, 15.0.

**IR:** (neat, cm<sup>-1</sup>): 3370, 2971, 2938, 1745, 1650, 1522, 1450, 1386, 1296, 1254, 1168, 1062, 810, 778, 715, 656.

**HR-MS:** (ESI): *m/z* calc. for C<sub>26</sub>H<sub>33</sub>N<sub>4</sub>O<sub>8</sub> [M+H]<sup>+</sup> 529.2293, found 529.2305.

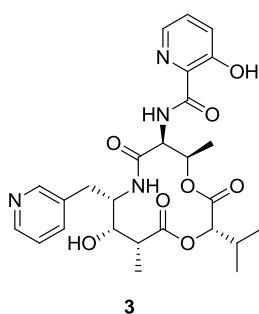

**Dihydropyridomycin 3:** To a solution of 3-hydroxypyridine-2-carboxylic acid (6.20 mg, 44.5 μmol, 1.10 eq.), HATU (18.5 mg, 48.6 μmol, 1.20 eq.) and DIEA (21.0 μl, 122 μmol, .300 eq.) in 0.4 mL MeCN (dark green) was added a solution of *epi*-**21** (16.5 mg, 40.5 μmol, 1.00 eq.) in 1.7 mL MeCN at RT. The mixture was stirred at RT for 24 h. The mixture was diluted with CH<sub>2</sub>Cl<sub>2</sub> (2 mL) and sat. aq. NaHCO<sub>3</sub> (1 mL). The aq. phase was extracted with CH<sub>2</sub>Cl<sub>2</sub> (3 x 5 mL) and the combined org. extracts were dried over MgSO<sub>4</sub> and concentrated *in vacuo*. The remaining orange oil was purified by FC (CH<sub>2</sub>Cl<sub>2</sub>/MeOH 5%) to yield **3** as a colorless film (12.0 mg, 56% over 2 steps). The samples prepared for biological testing were purified by reversed phase HPLC (Symmetry® C18 5 μm 19x100 mm column, gradient: 30% → 100% MeCN in H<sub>2</sub>O in 14 min, flow: 25 mL/min, room temperature, *t<sub>R</sub>* = 6.78 min) to a purity >98%.

**R<sub>f</sub>:** 0.30 (CH<sub>2</sub>Cl<sub>2</sub>/MeOH 5%)

**[α]<sub>D</sub><sup>20</sup>:** -60.5° (c 0.110, MeOH)

**<sup>1</sup>H-NMR:** (500 MHz, DMSO-d<sub>6</sub>): δ 11.84 (s, 1H), 8.58 (d, *J* = 6.4 Hz, 1H), 8.44 (d, *J* = 1.8 Hz, 1H), 8.30 (dd, *J* = 4.8, 1.6 Hz, 1H), 8.18 (dd, *J* = 4.3, 1.2 Hz, 1H), 7.65 (dt, *J* = 7.8, 1.8 Hz, 1H), 7.60 (d, *J* = 3.4 Hz, 1H), 7.56 (dd, *J* = 8.5, 4.4 Hz, 1H), 7.45 (dd, *J* = 8.5, 1.2 Hz, 1H), 7.21 (dd, *J* = 7.7, 4.8 Hz, 1H), 5.49 (s, 1H), 5.02 (p, *J* = 5.9 Hz, 1H), 4.88 (dd, *J* = 6.9, 5.4 Hz, 1H), 4.54 (d, *J* = 5.3 Hz, 1H), 4.05 (q, *J* = 7.6 Hz, 1H), 3.63 (d, *J* = 4.1 Hz, 1H), 2.85 (qd, *J* = 13.5, 7.2 Hz, 2H), 2.50 – 2.44 (m, 1H), 2.28 – 2.17 (m, 1H), 1.23 (d, *J* = 7.1 Hz, 3H), 1.09 (d, *J* = 6.2 Hz, 3H), 1.01 (dd, *J* = 6.7, 4.6 Hz, 6H).

**<sup>13</sup>C-NMR:** (126 MHz, DMSO-d<sub>6</sub>): δ 174.0, 168.3, 168.2, 166.7, 157.7, 150.8, 147.8, 140.7, 137.1, 134.6, 130.9, 130.2, 126.8, 123.7, 78.1, 71.7, 69.7, 55.2, 54.0, 45.8, 36.0, 29.8, 19.1, 17.9, 16.6, 13.1.

**IR:** (neat,  $\text{cm}^{-1}$ ): 3373, 2977, 2942, 1732, 1650, 1510, 1450, 1293, 1257, 1062, 1026, 1013, 811, 783, 717, 662, 589.

**HR-MS:** (ESI):  $m/z$  calc. for  $\text{C}_{26}\text{H}_{33}\text{N}_4\text{O}_8$   $[\text{M}+\text{H}]^+$  529.2293, found 529.2281.

## 5. $^1\text{H}$ - and $^{13}\text{C}$ -NMR Spectra of New Comp

11

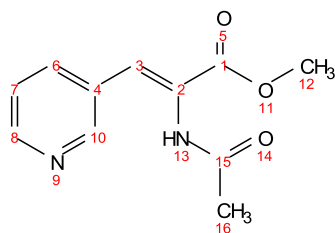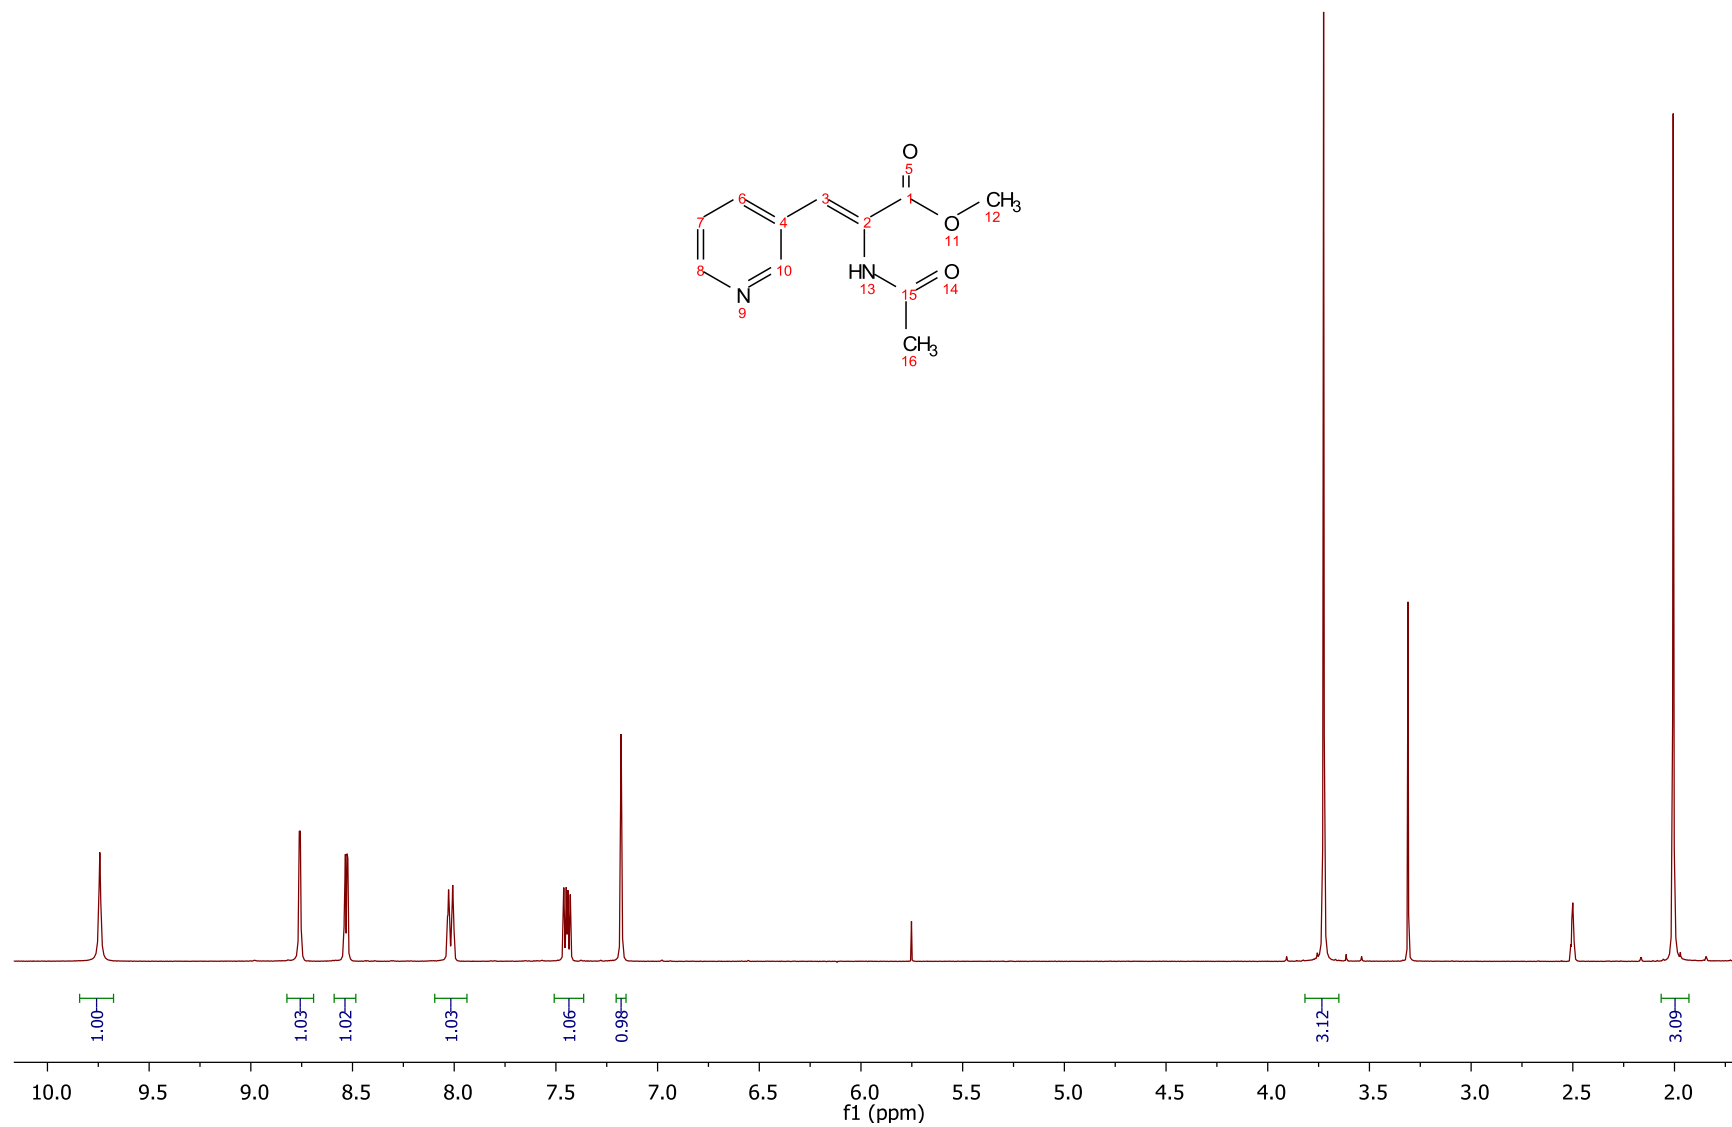

**11**

— 168.4  
— 165.4

— 150.7  
— 149.8

— 136.36

— 130.41  
— 128.03  
— 125.52  
— 123.48

— 53.07

— 23.68

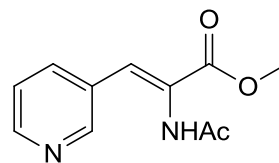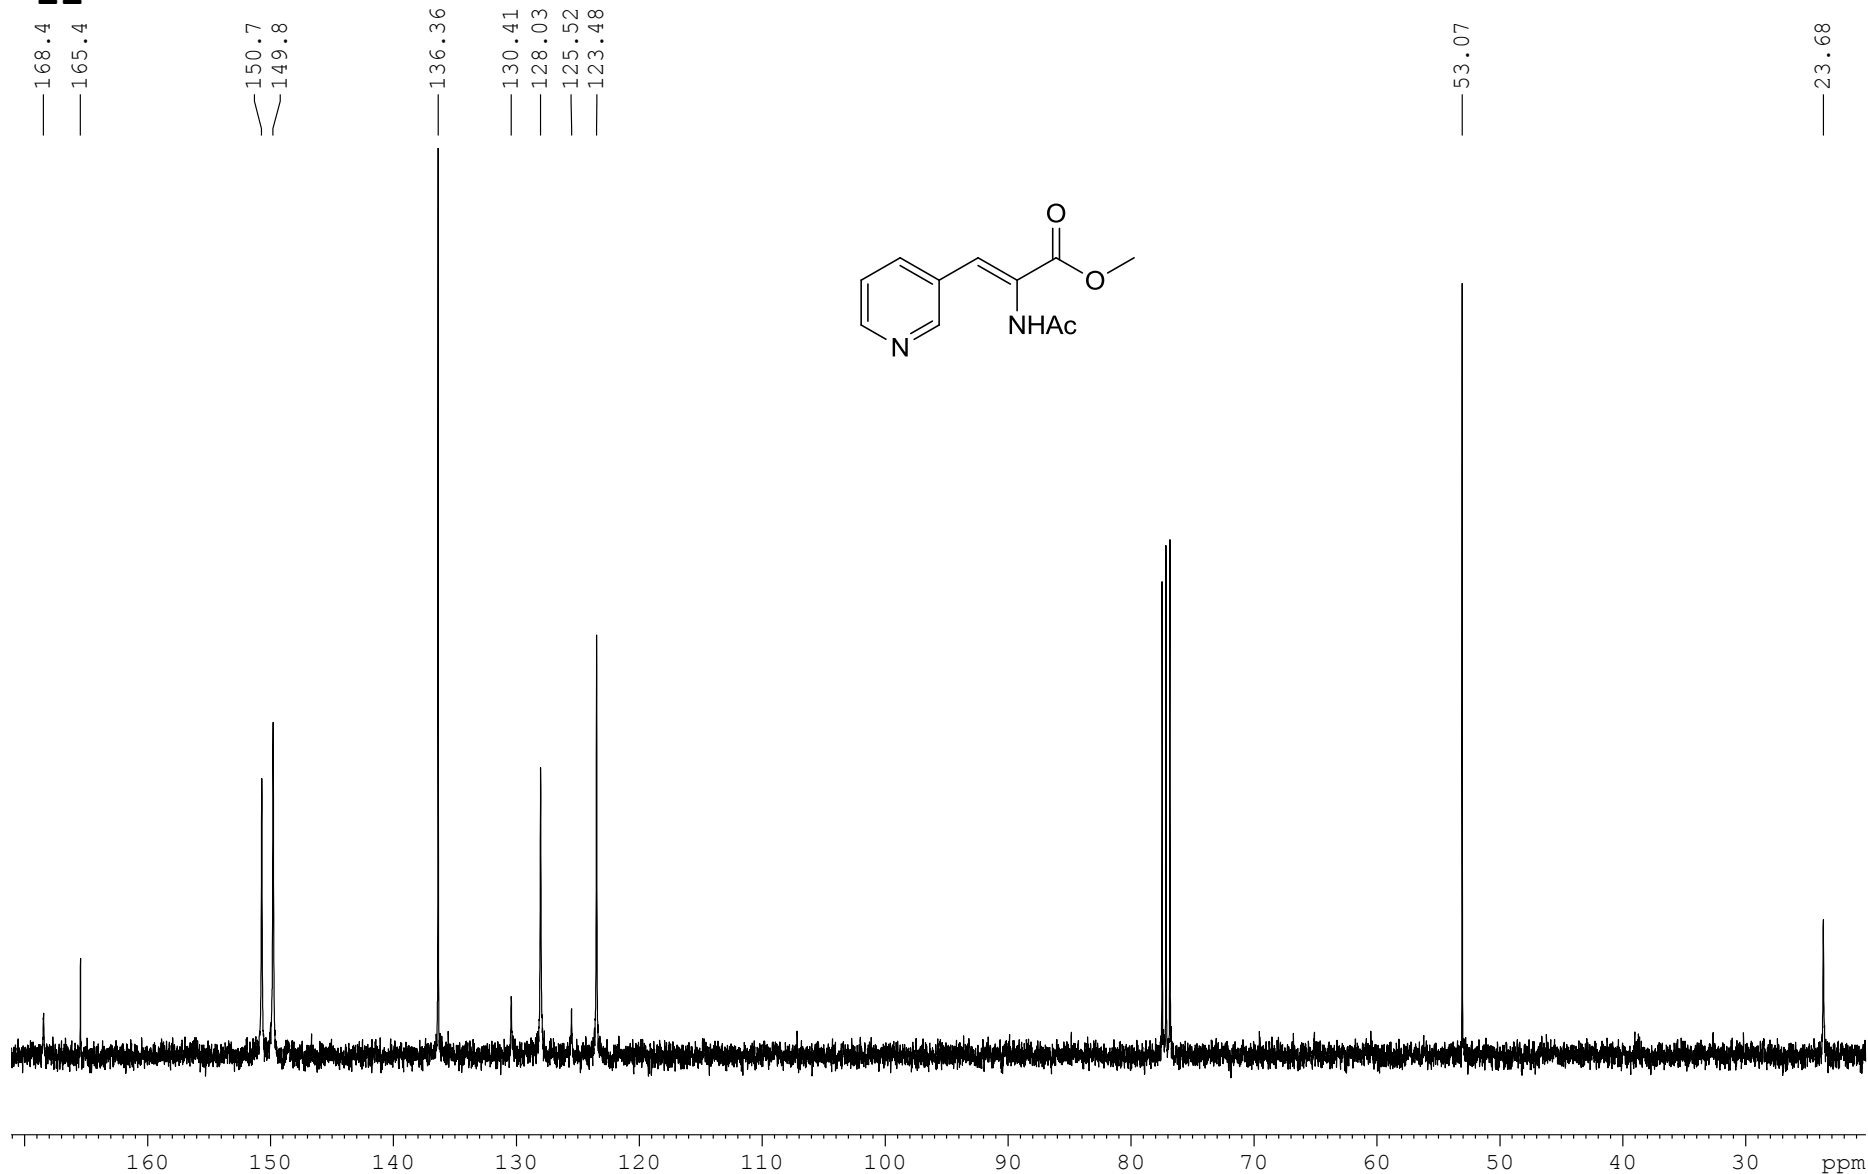



12

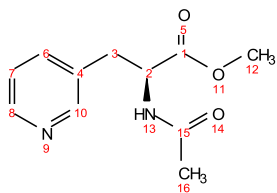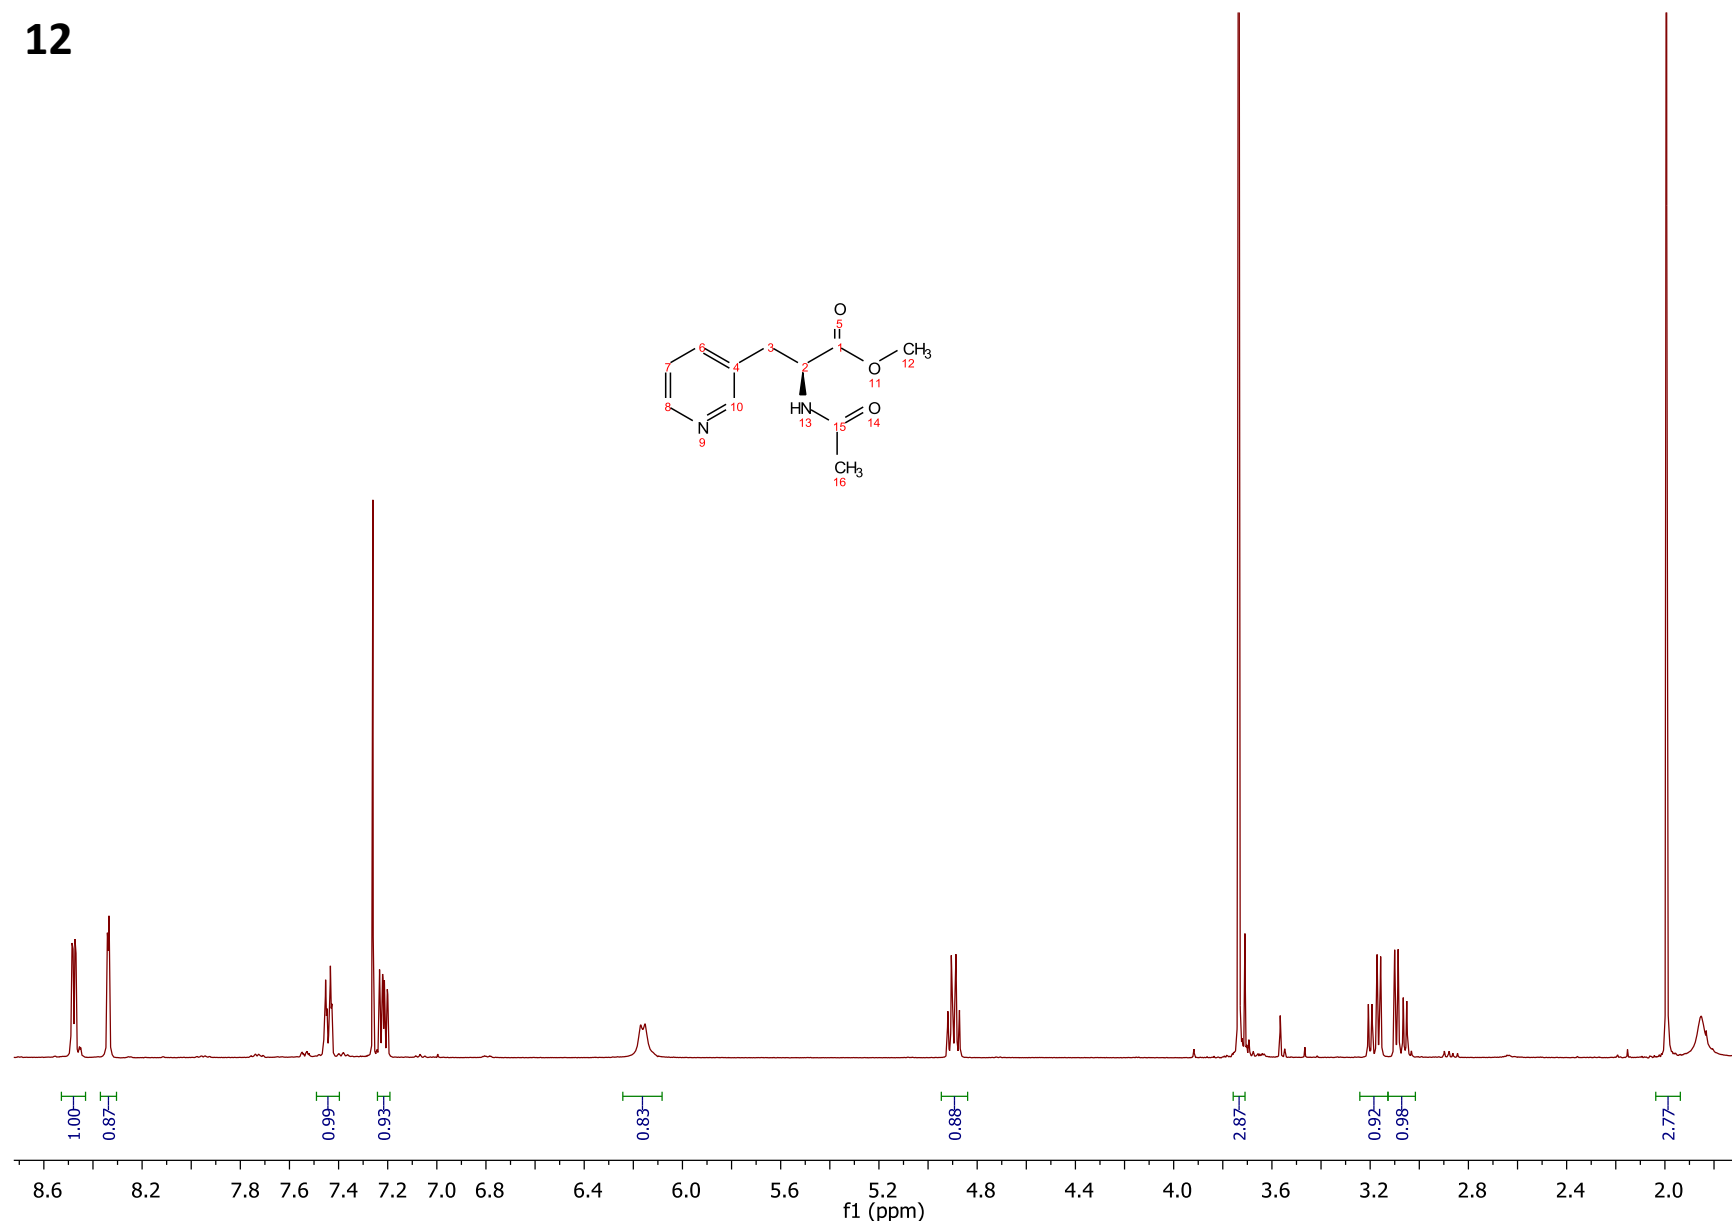

12

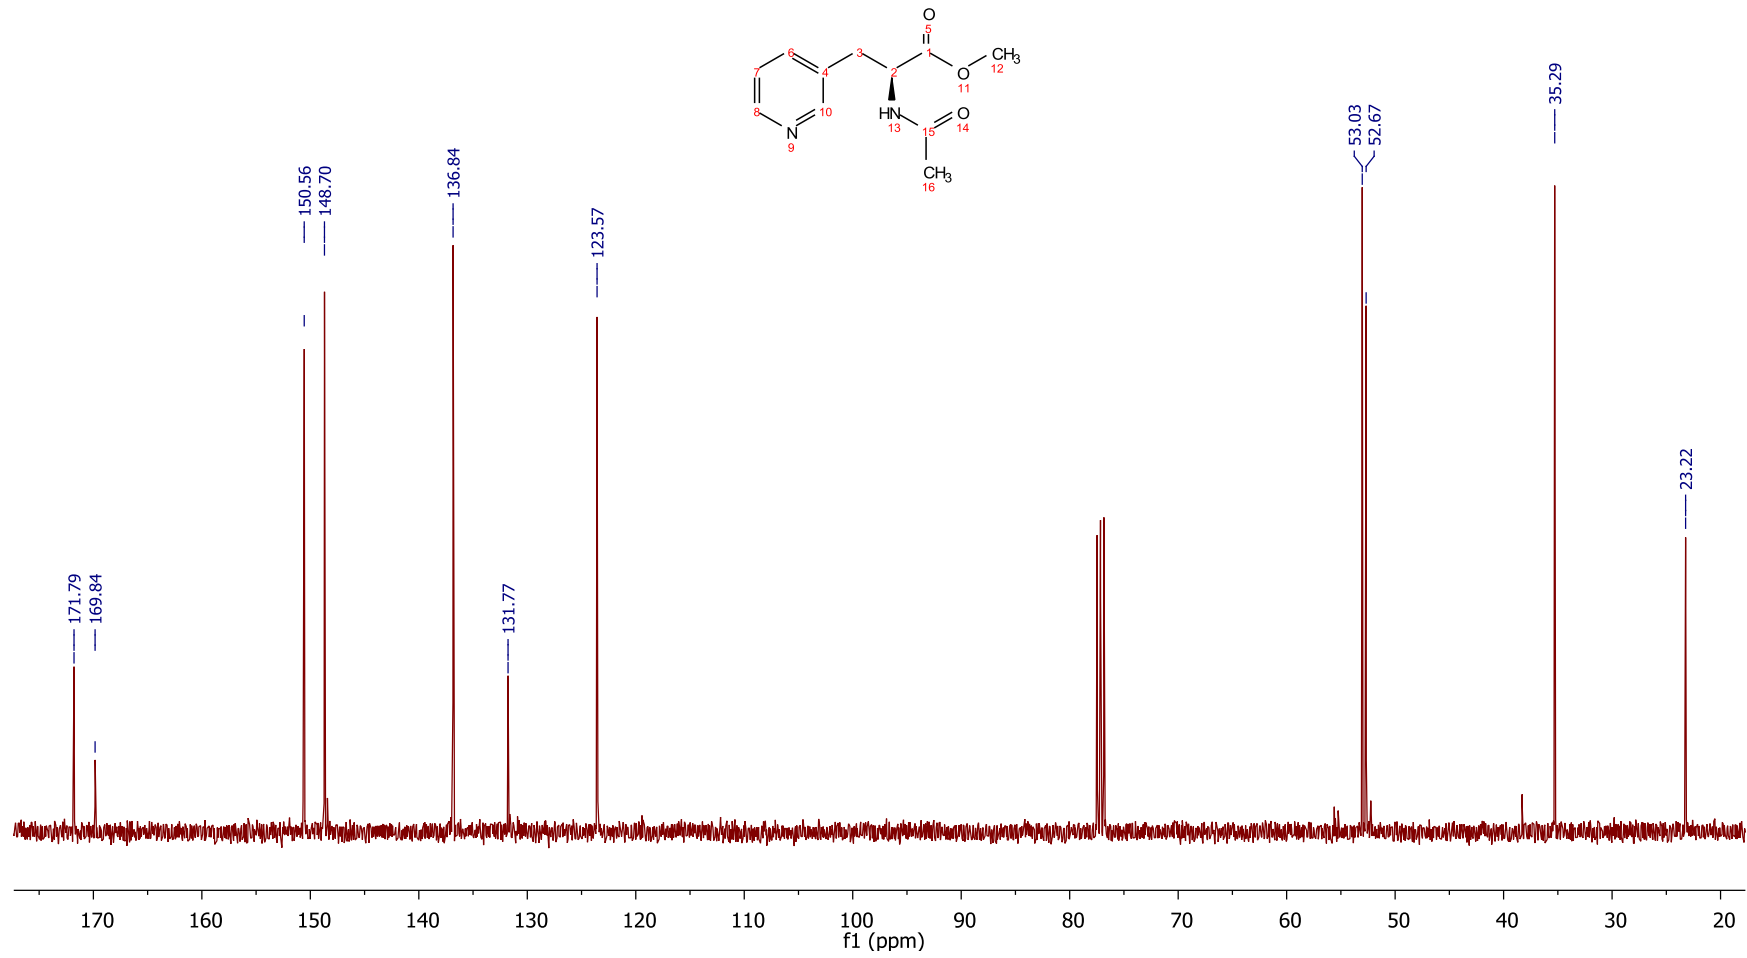

27 (crude)

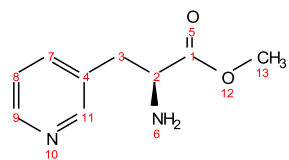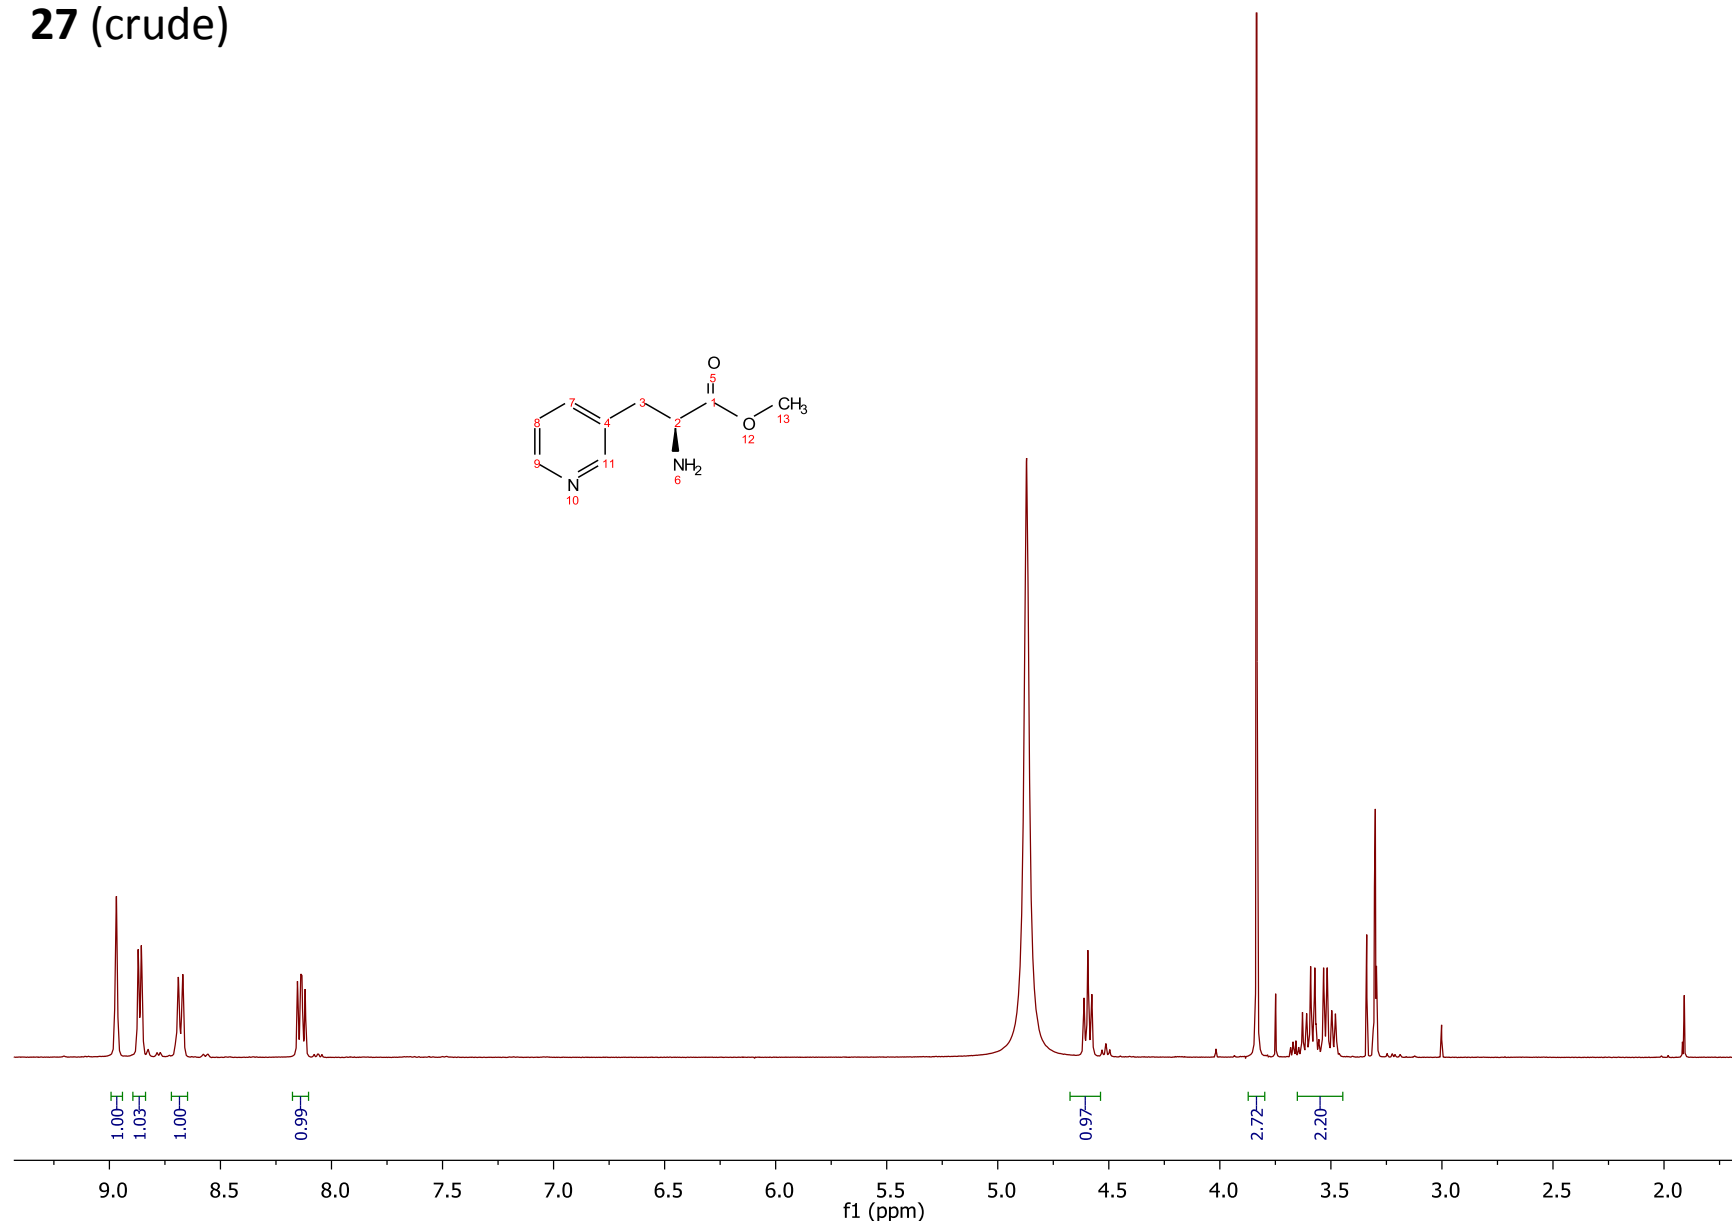

27 (crude)

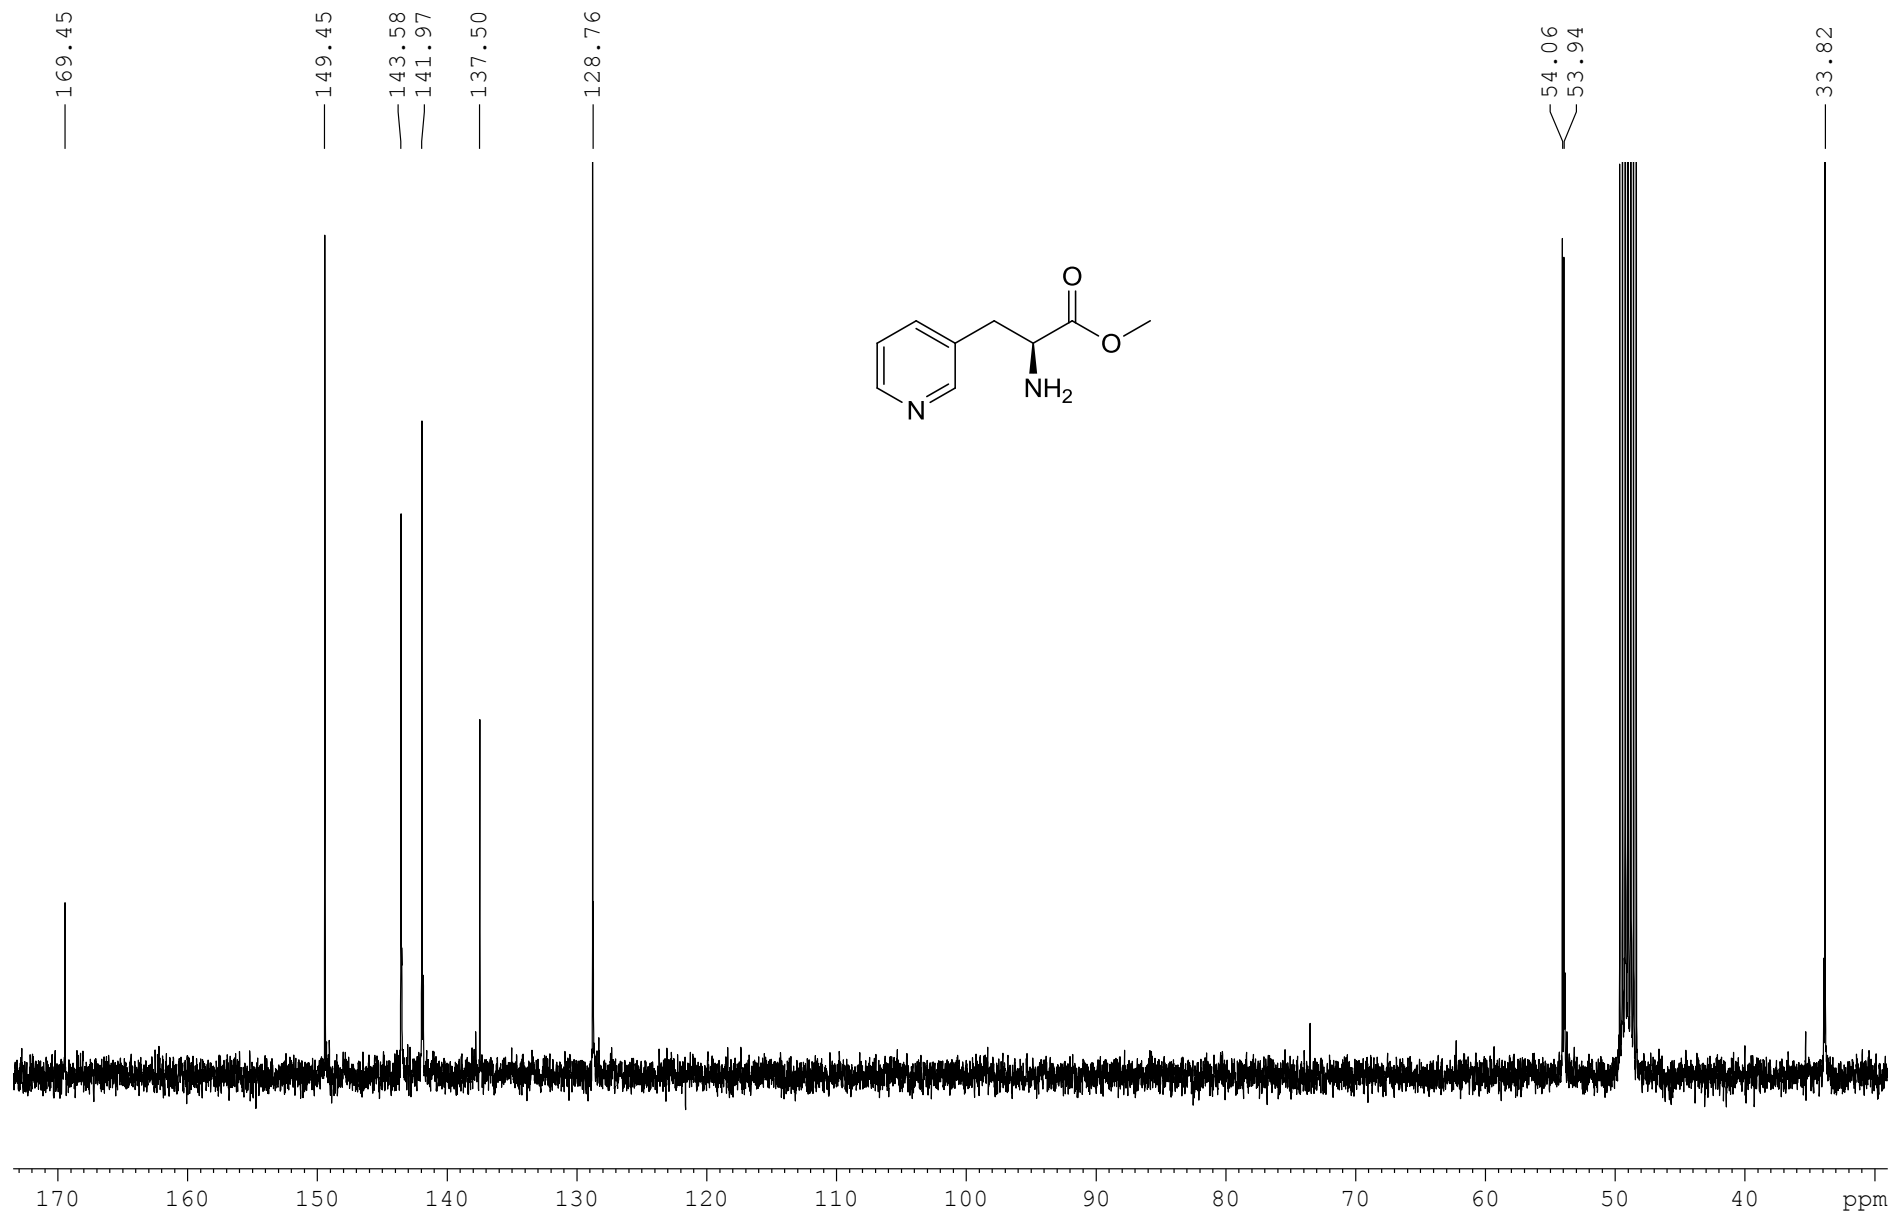

13

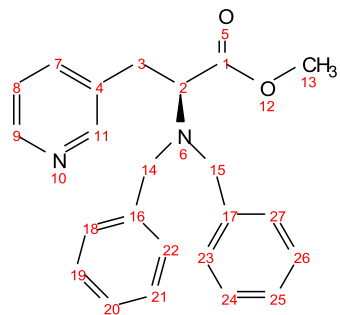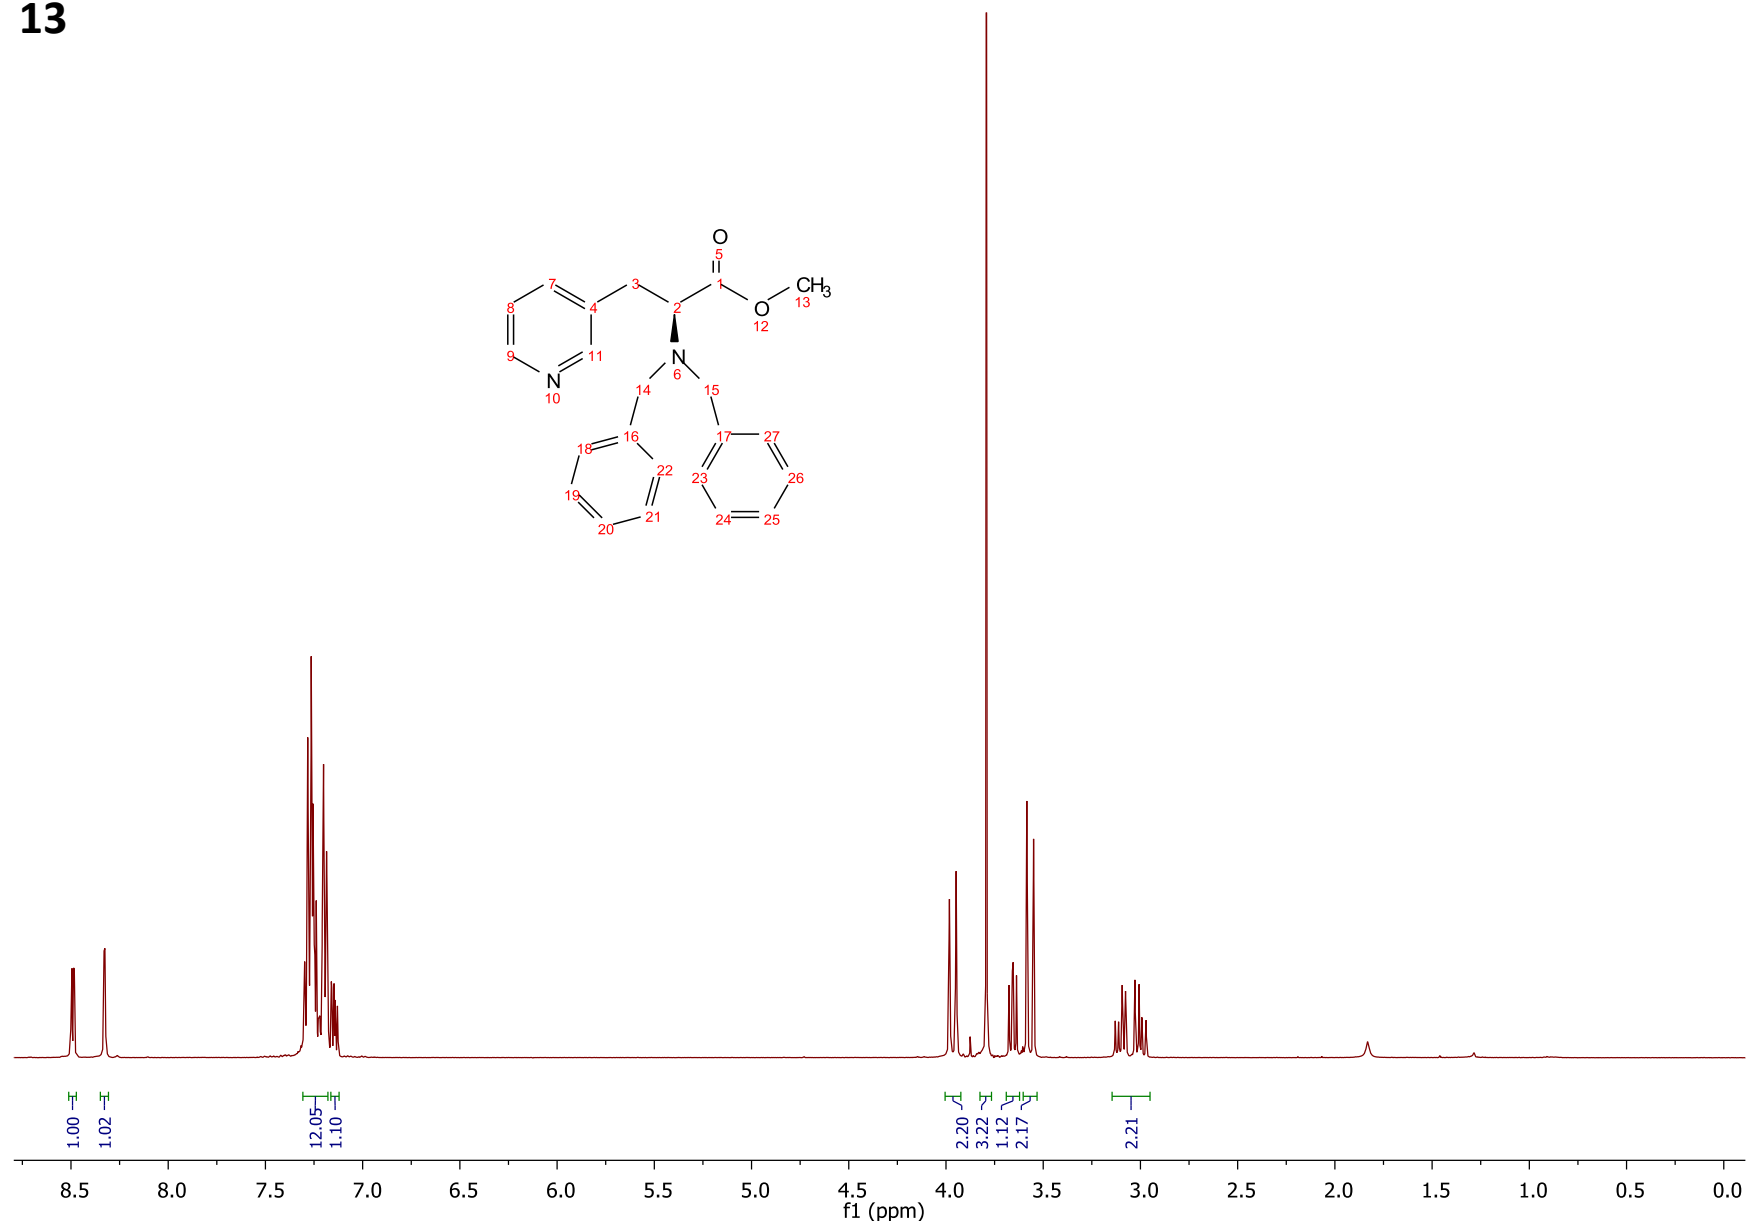

13

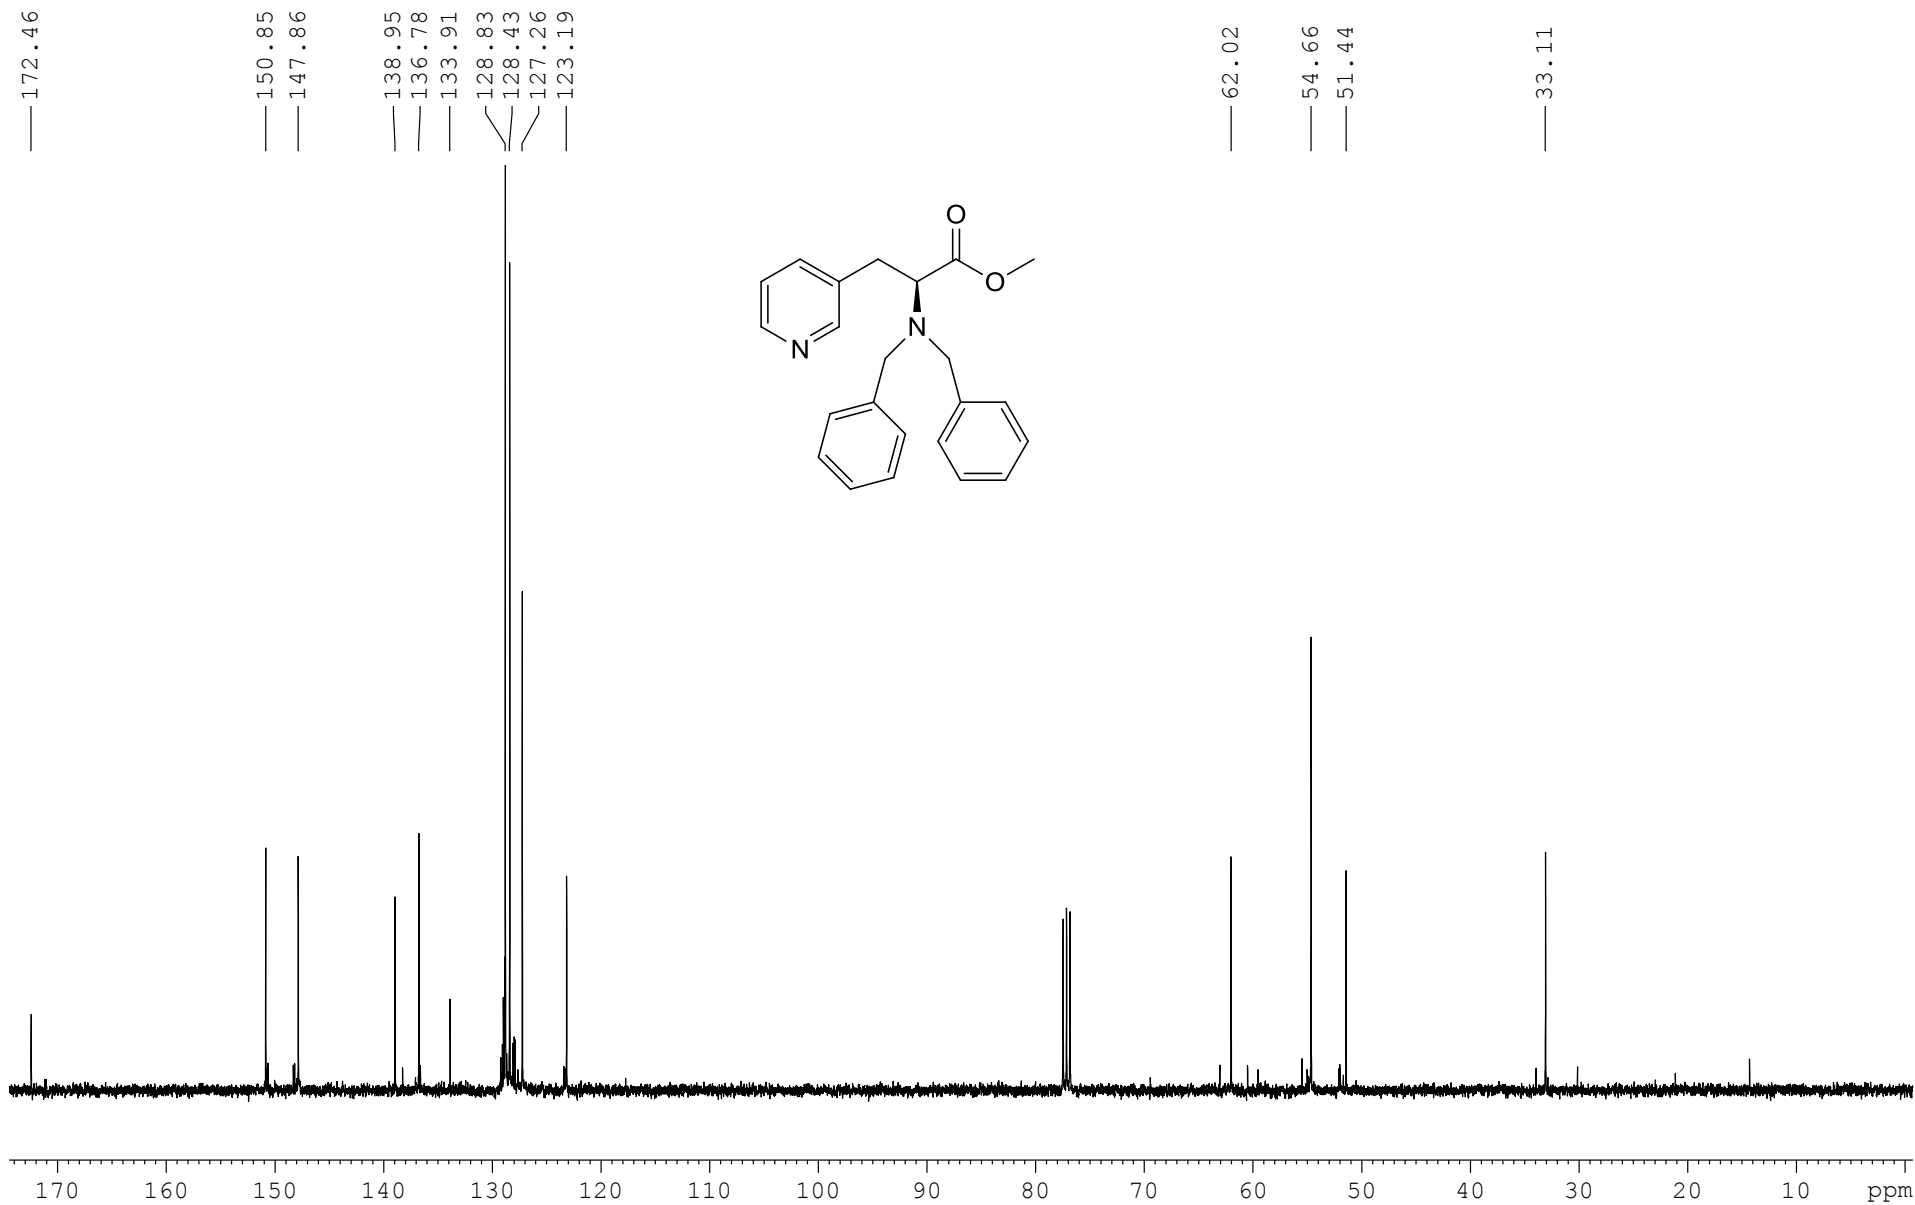

14

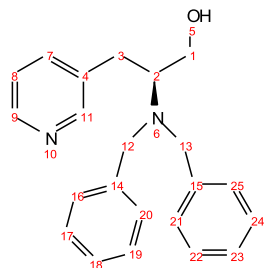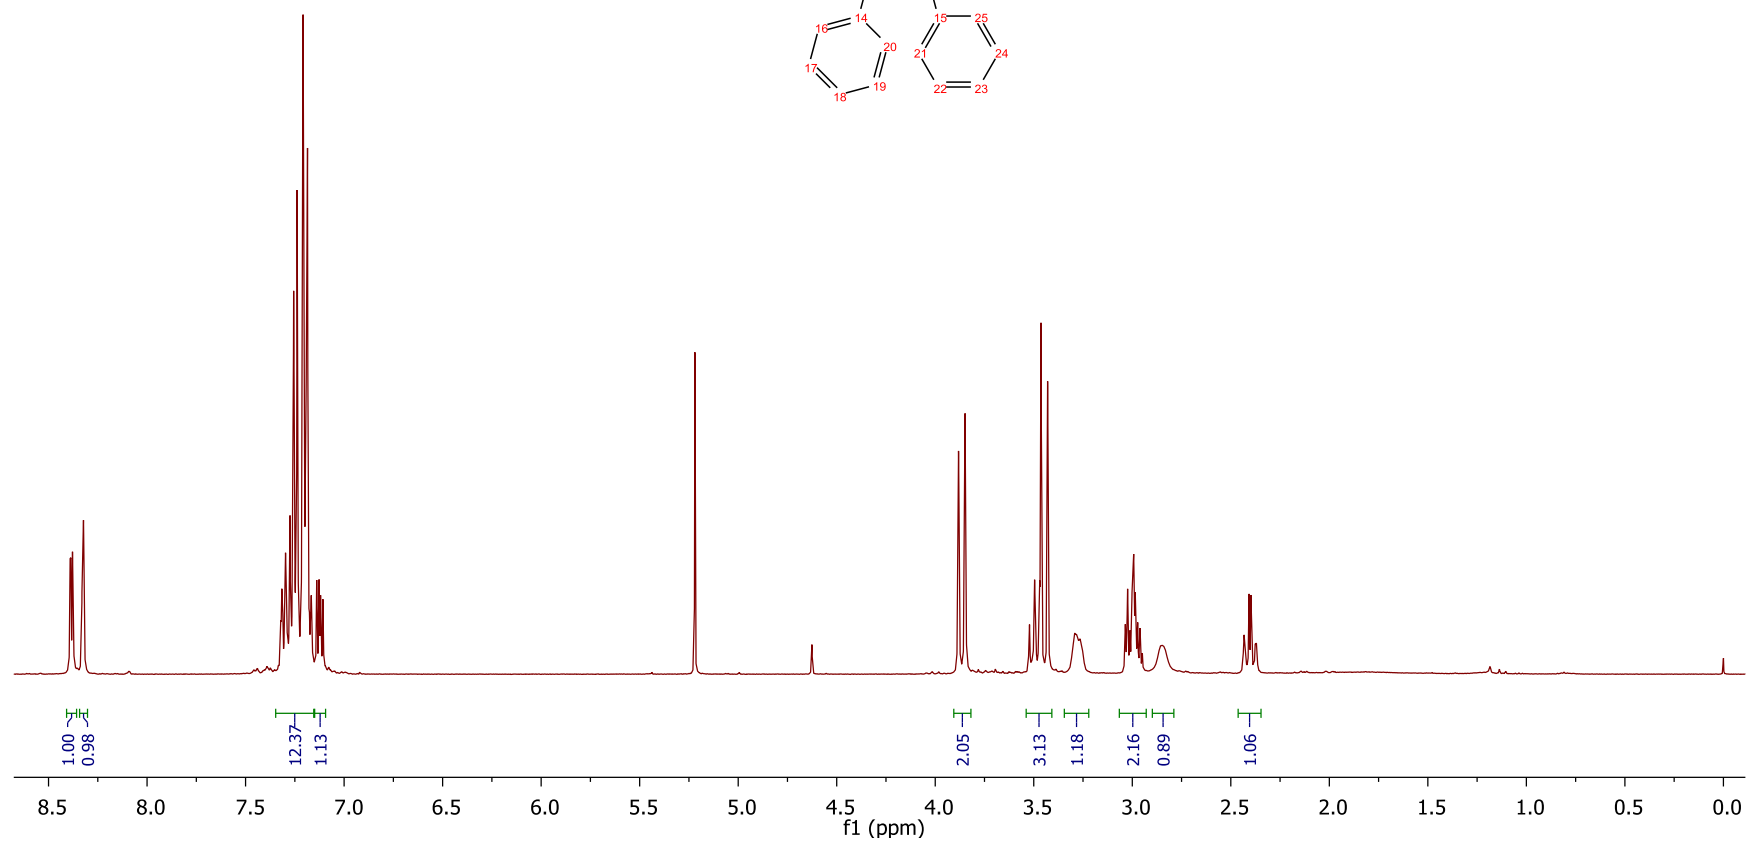

14

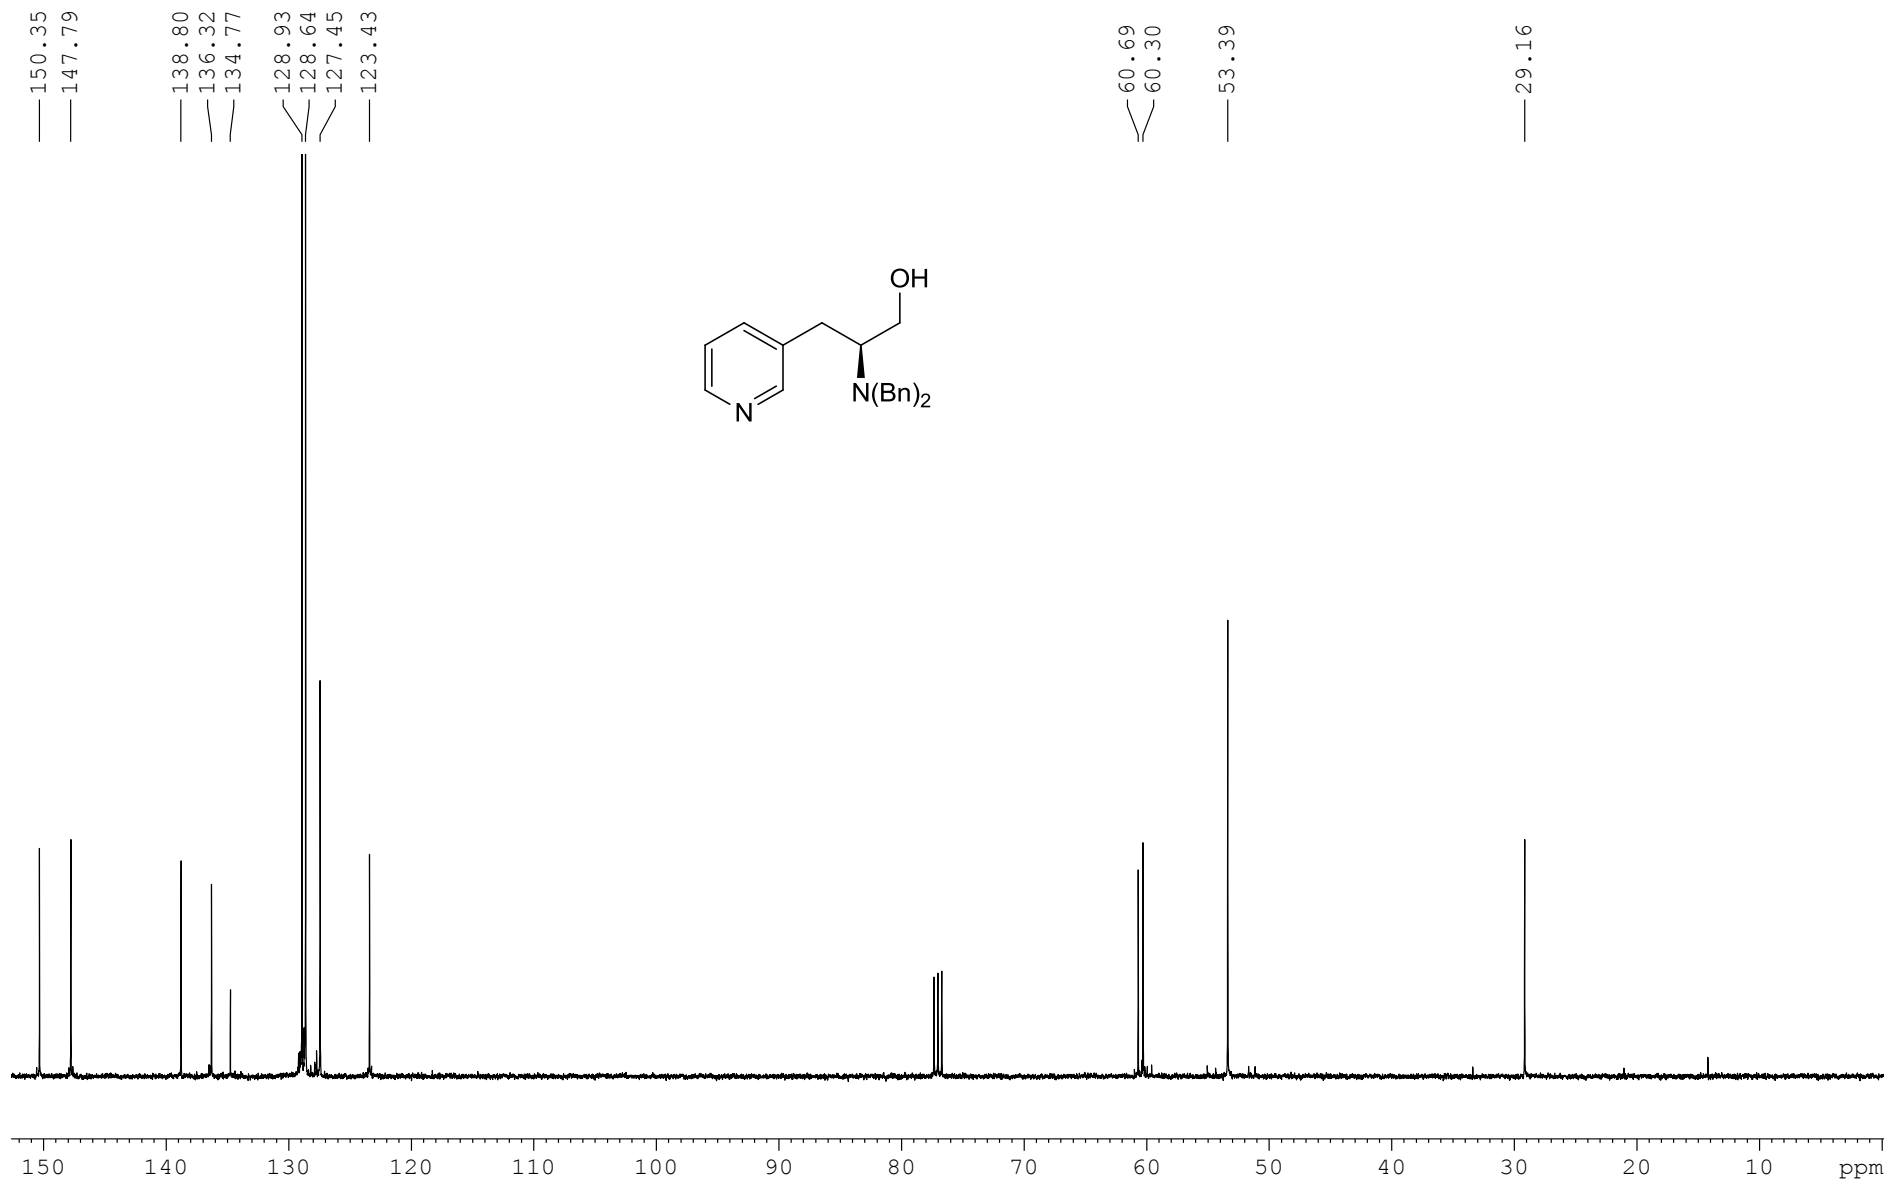



16

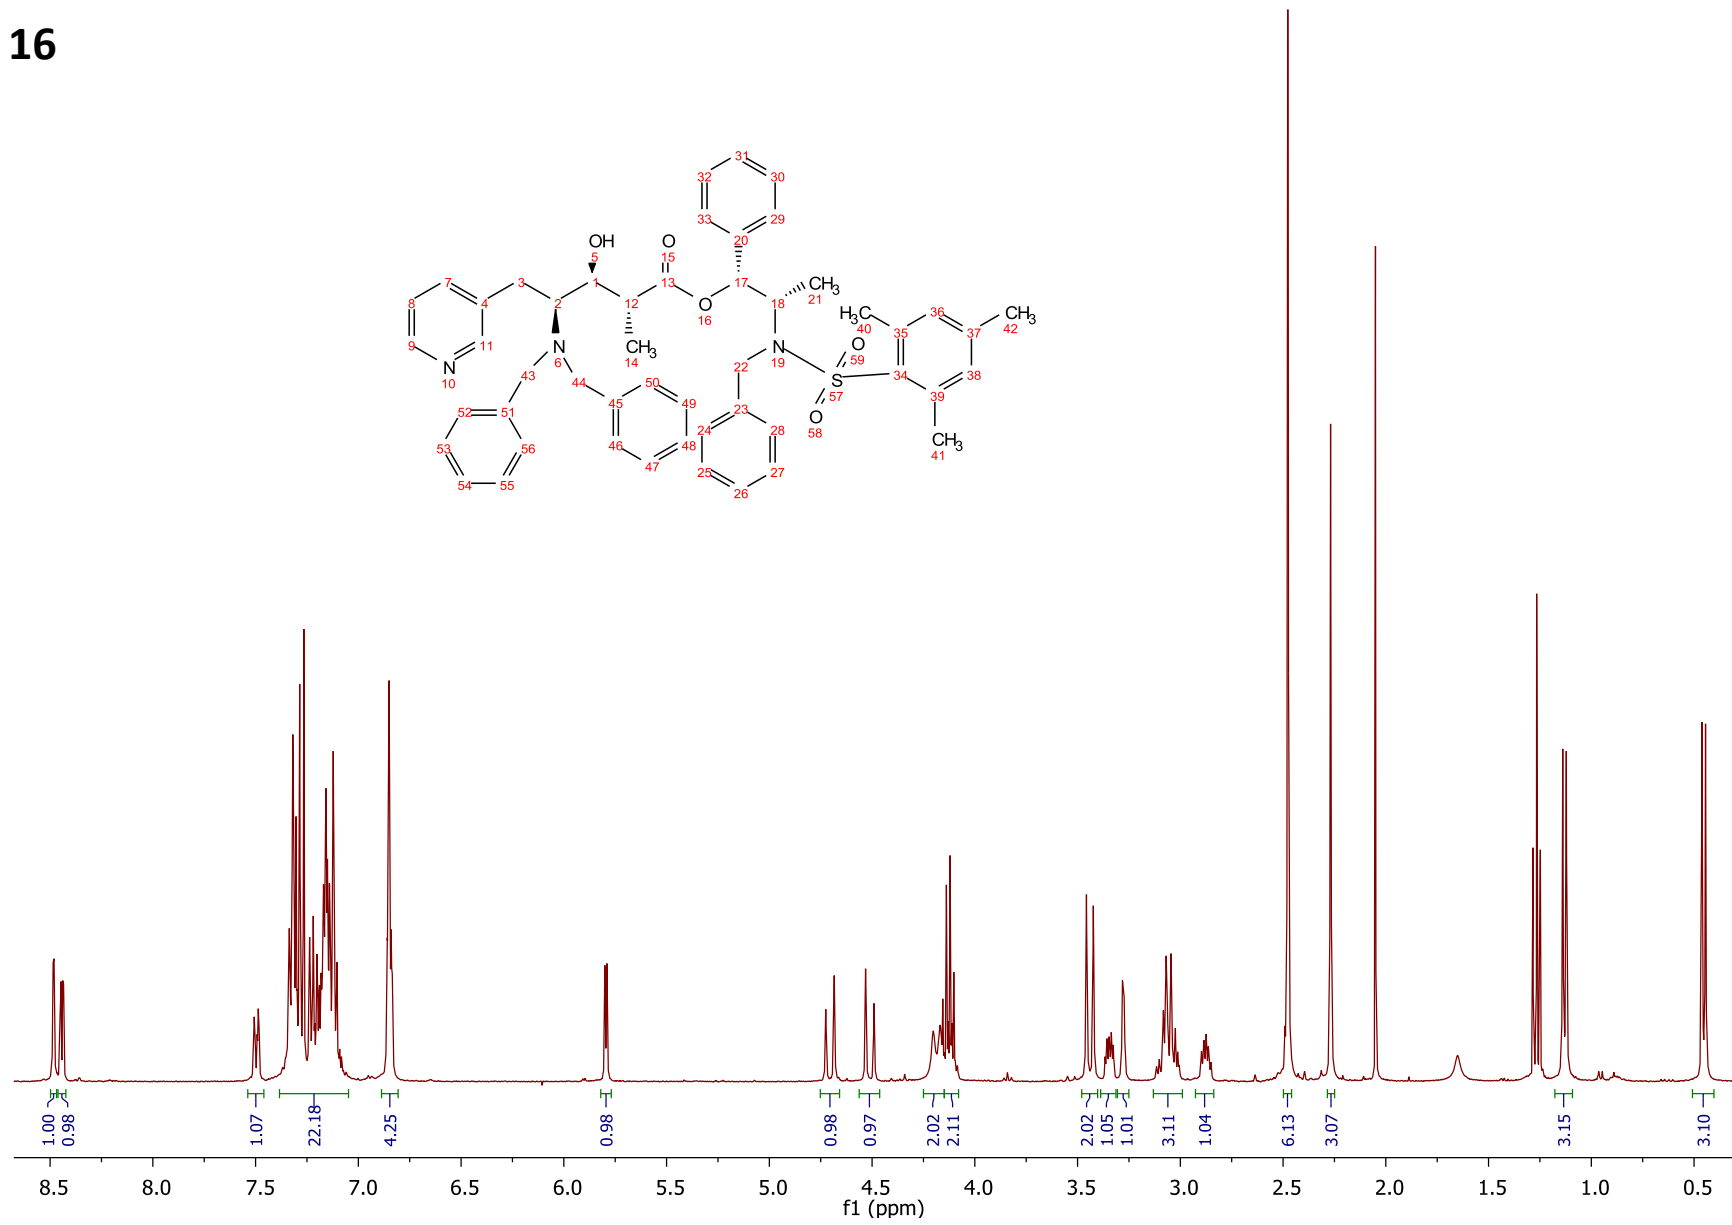

16

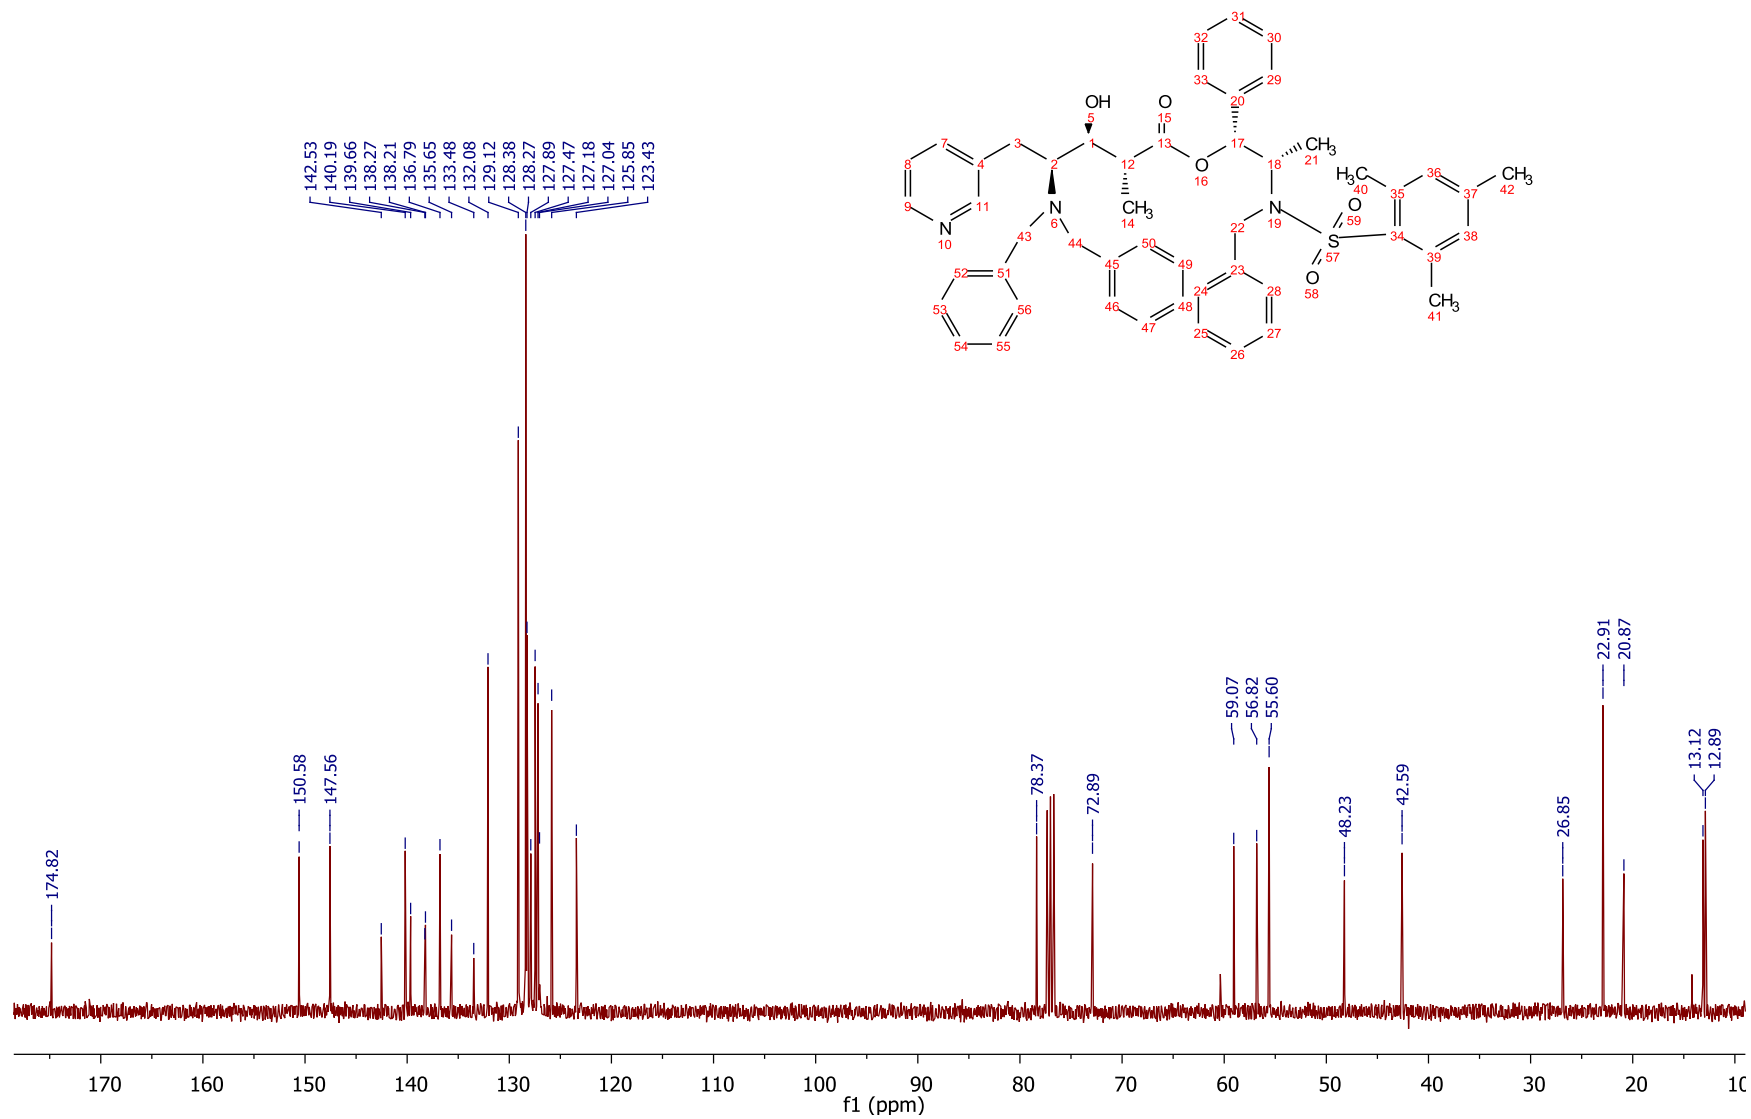

18

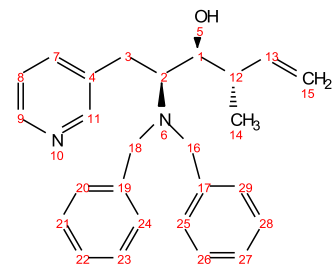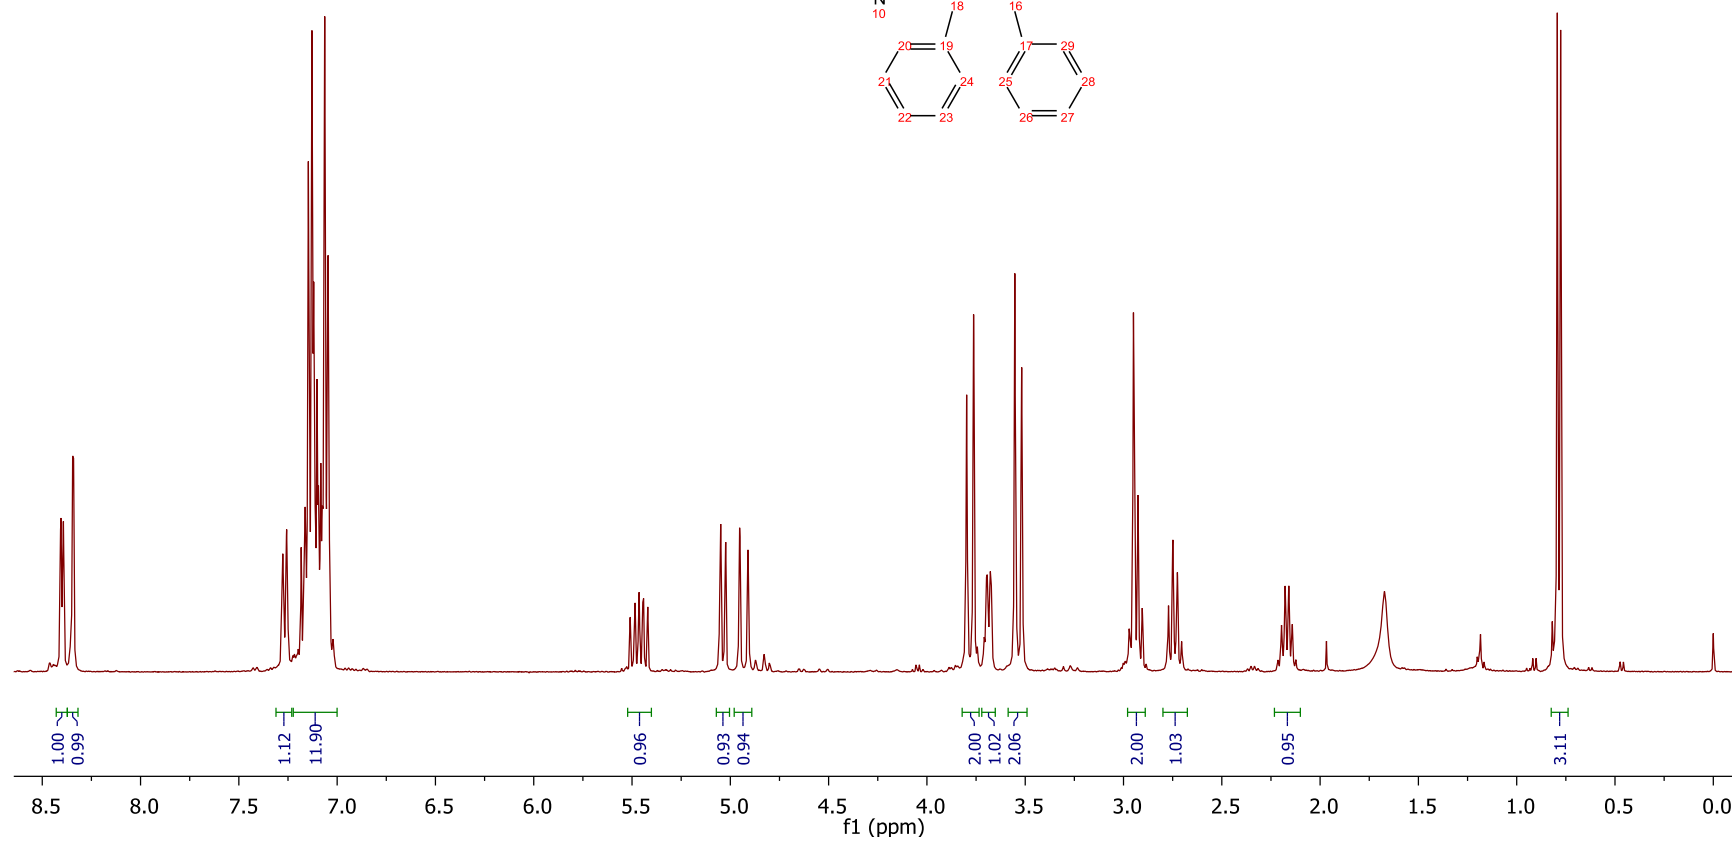

18

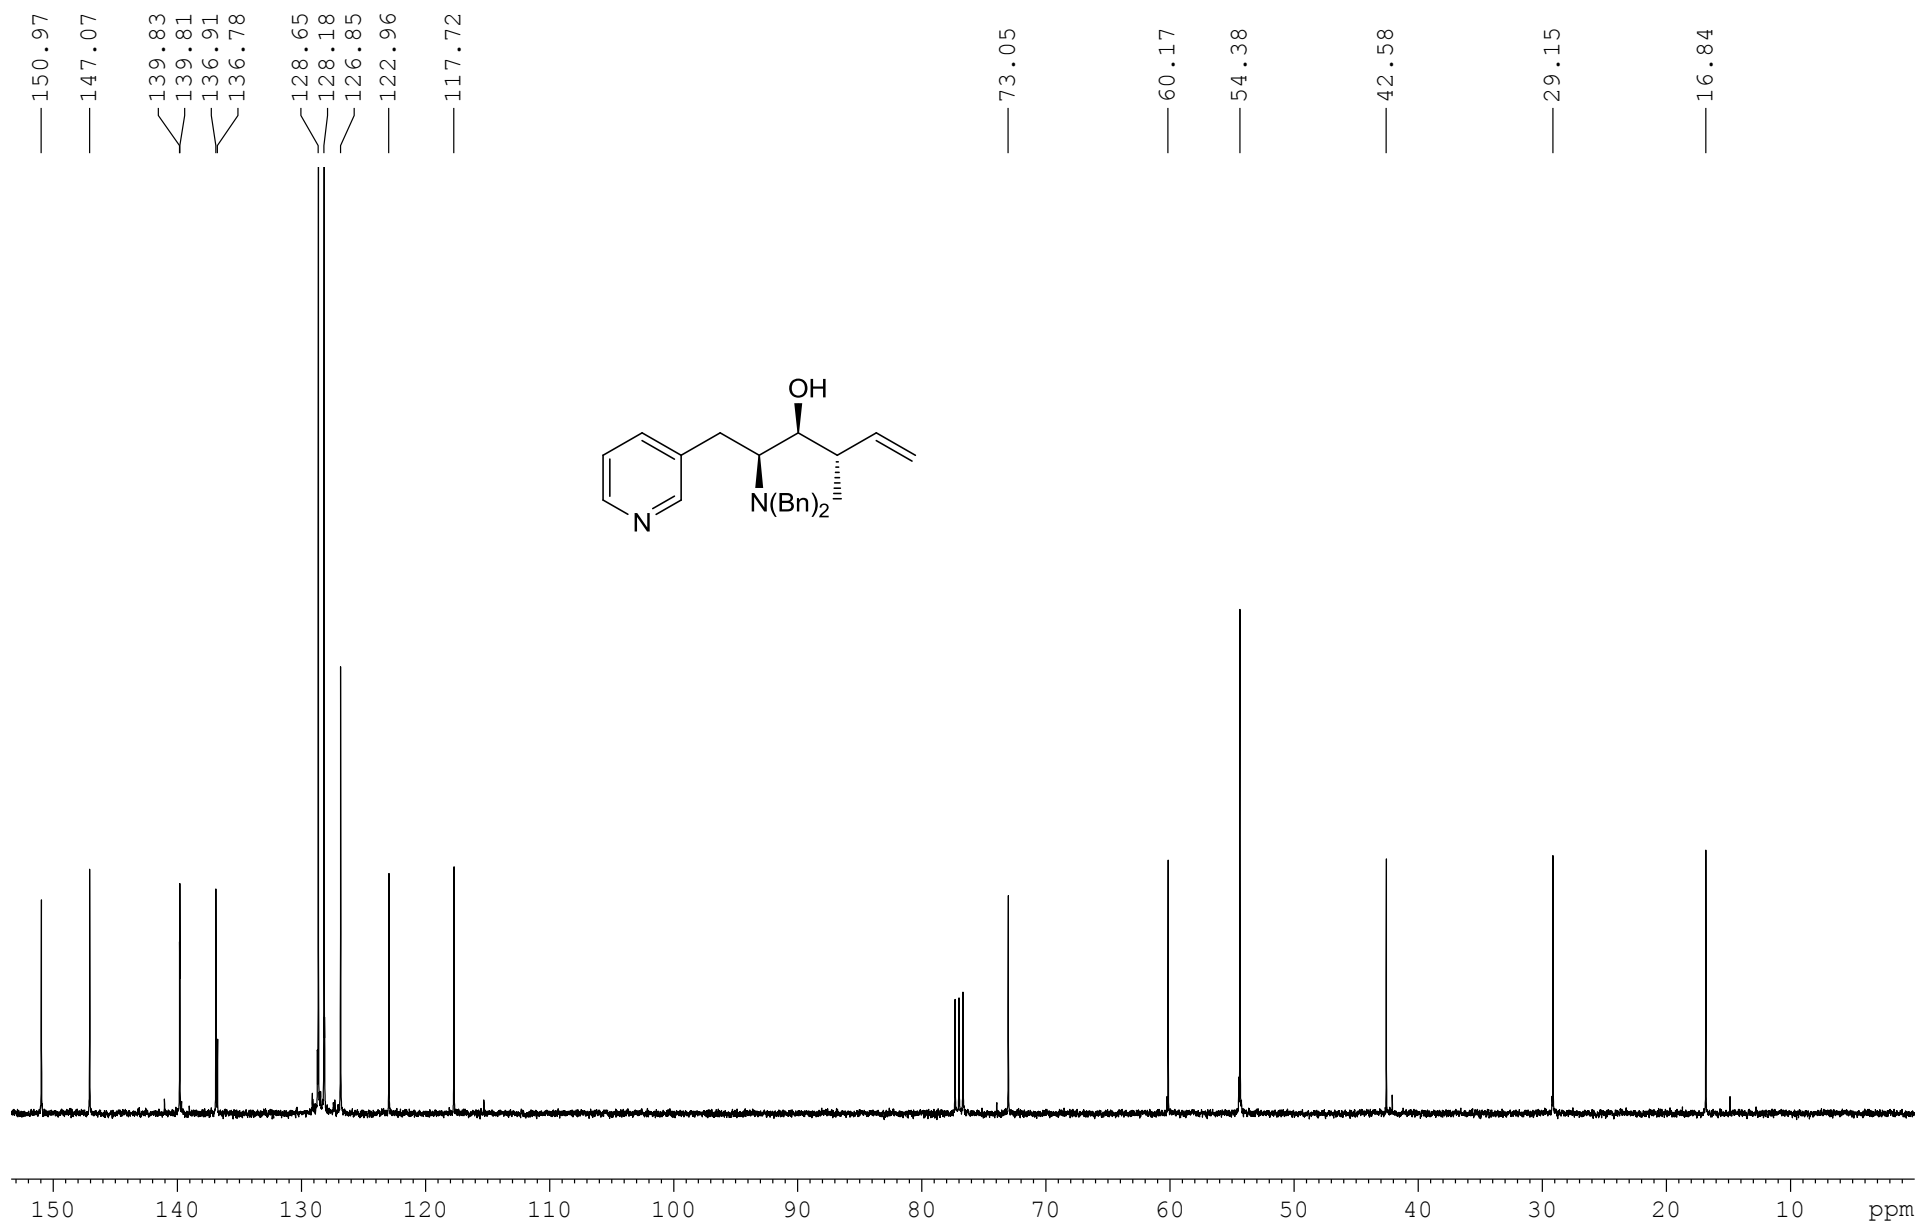

5

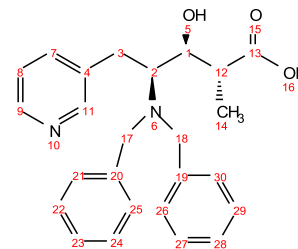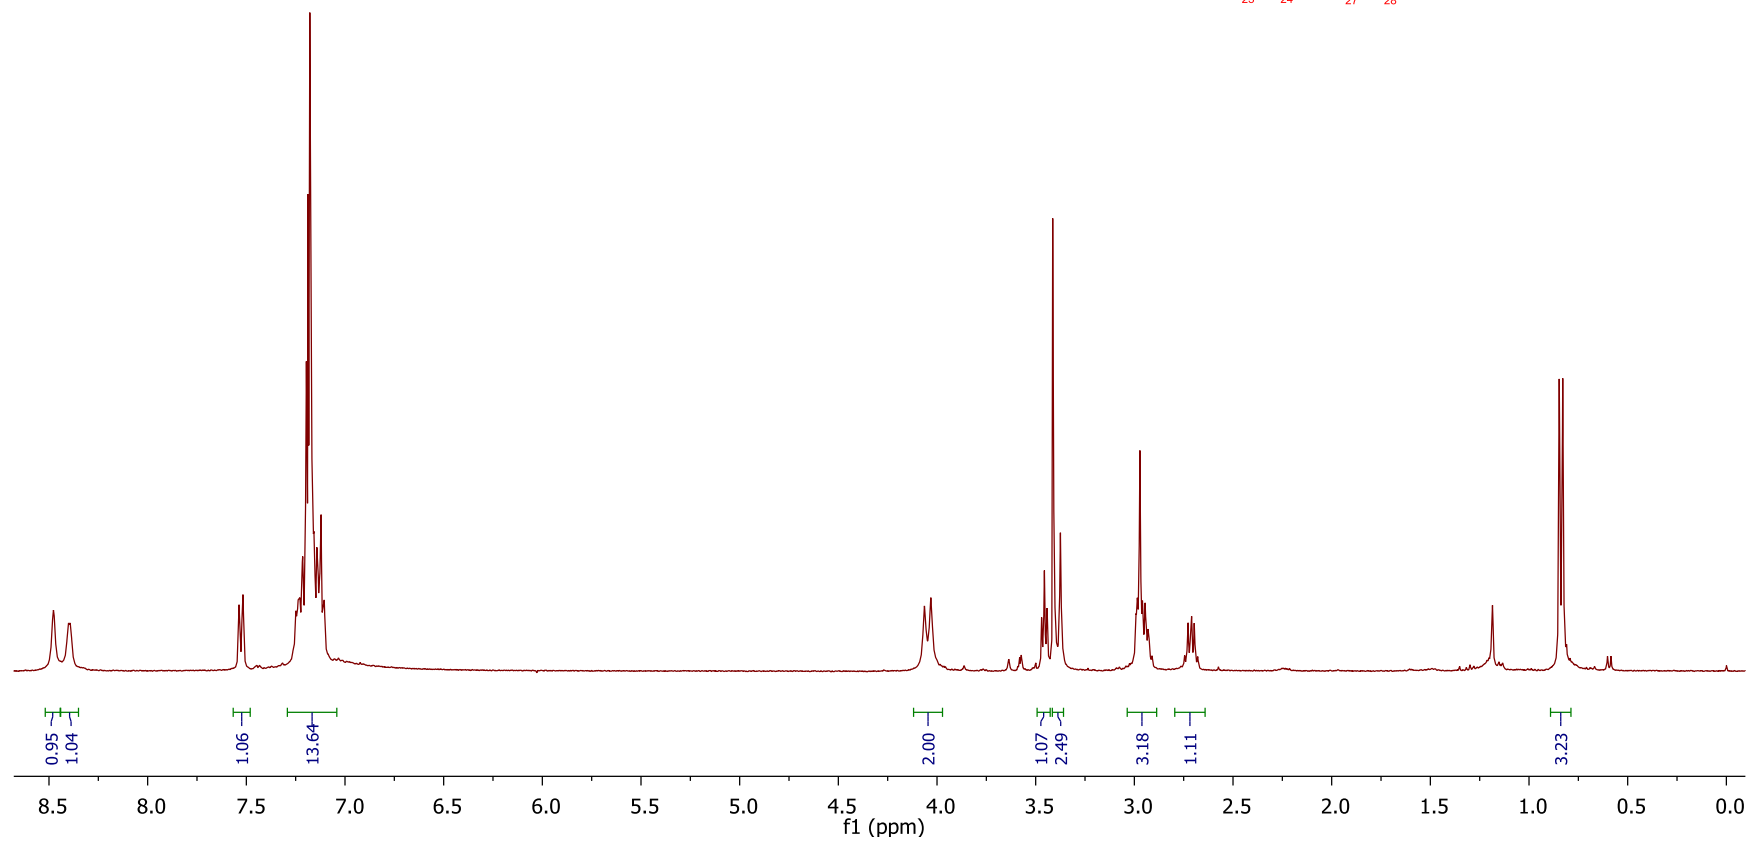

5

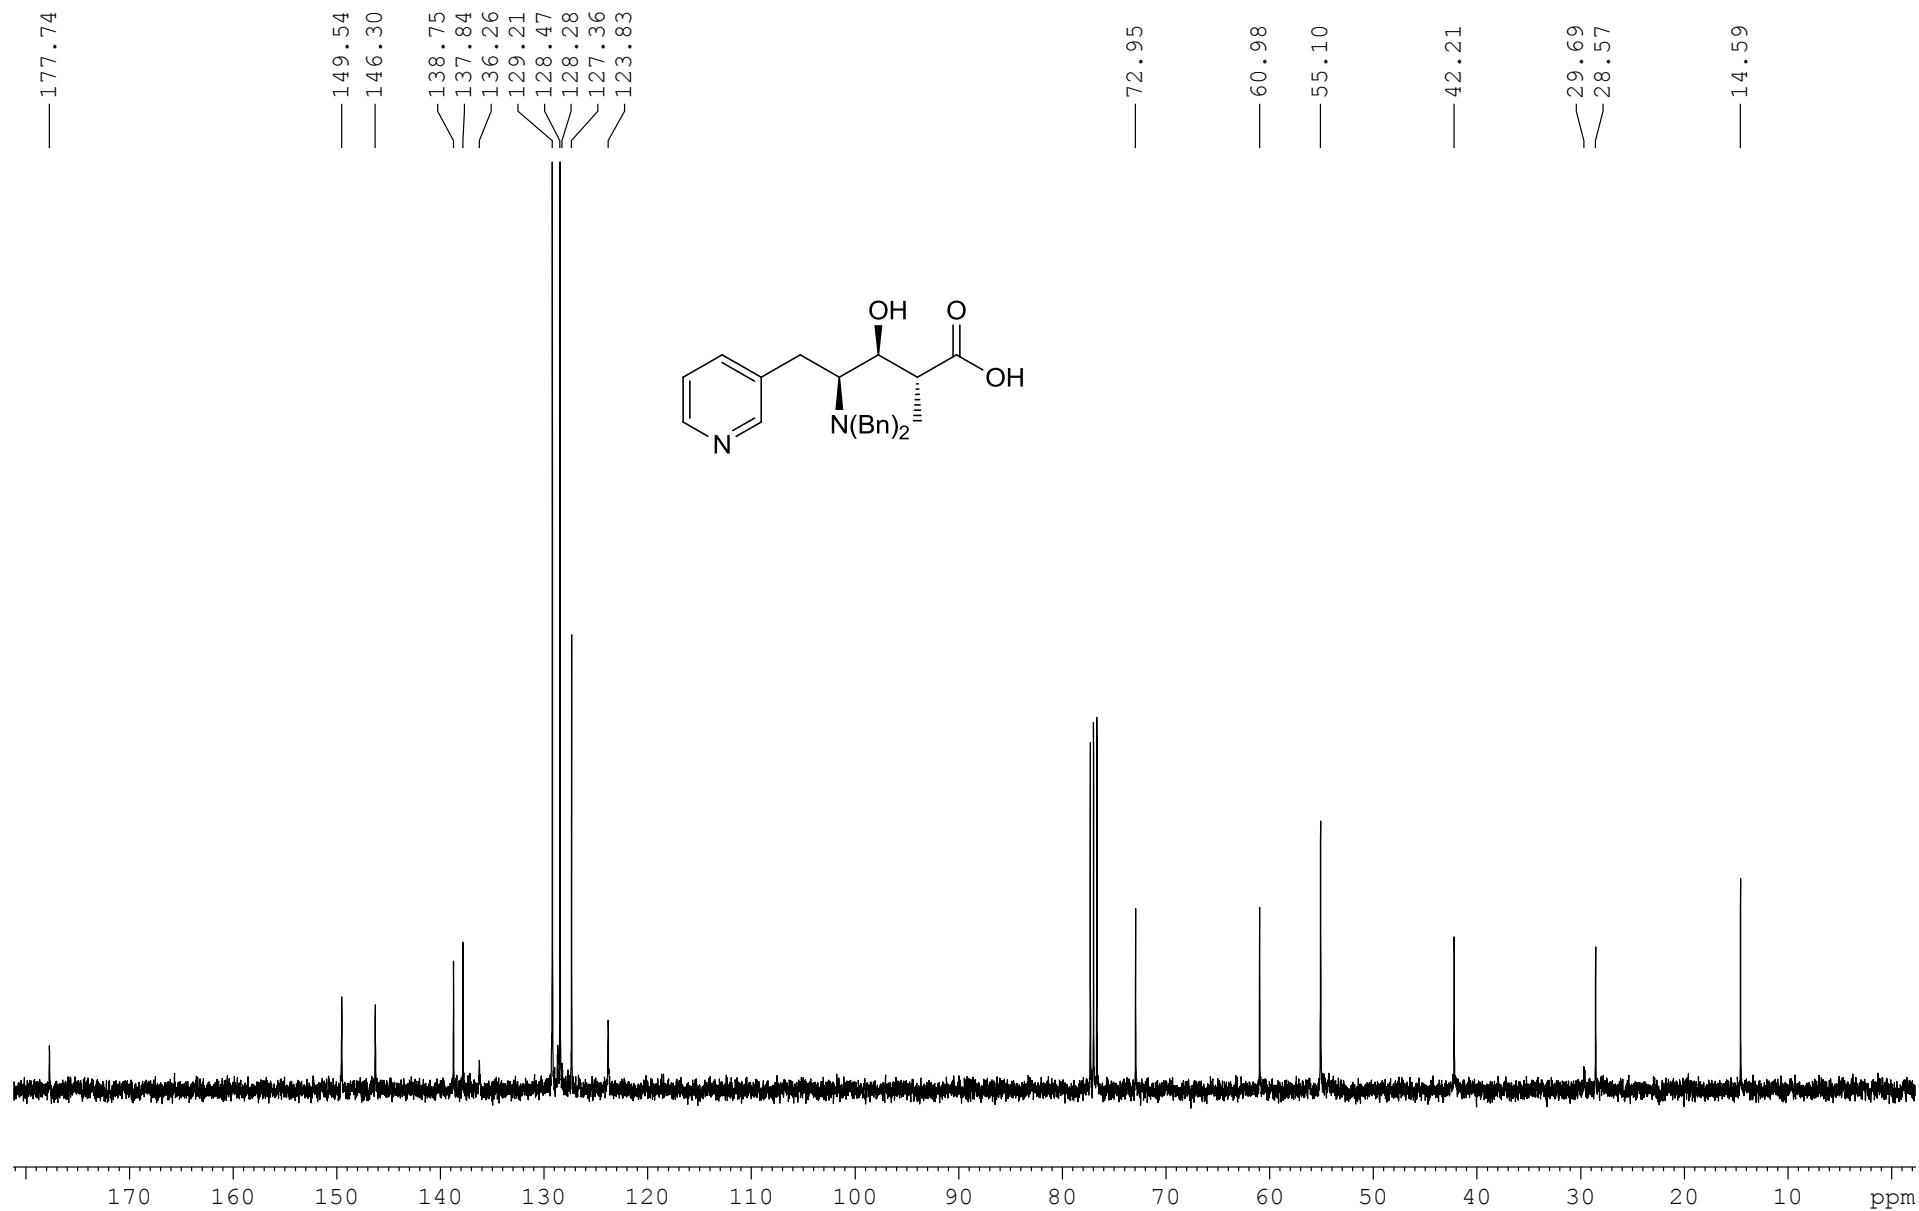

22

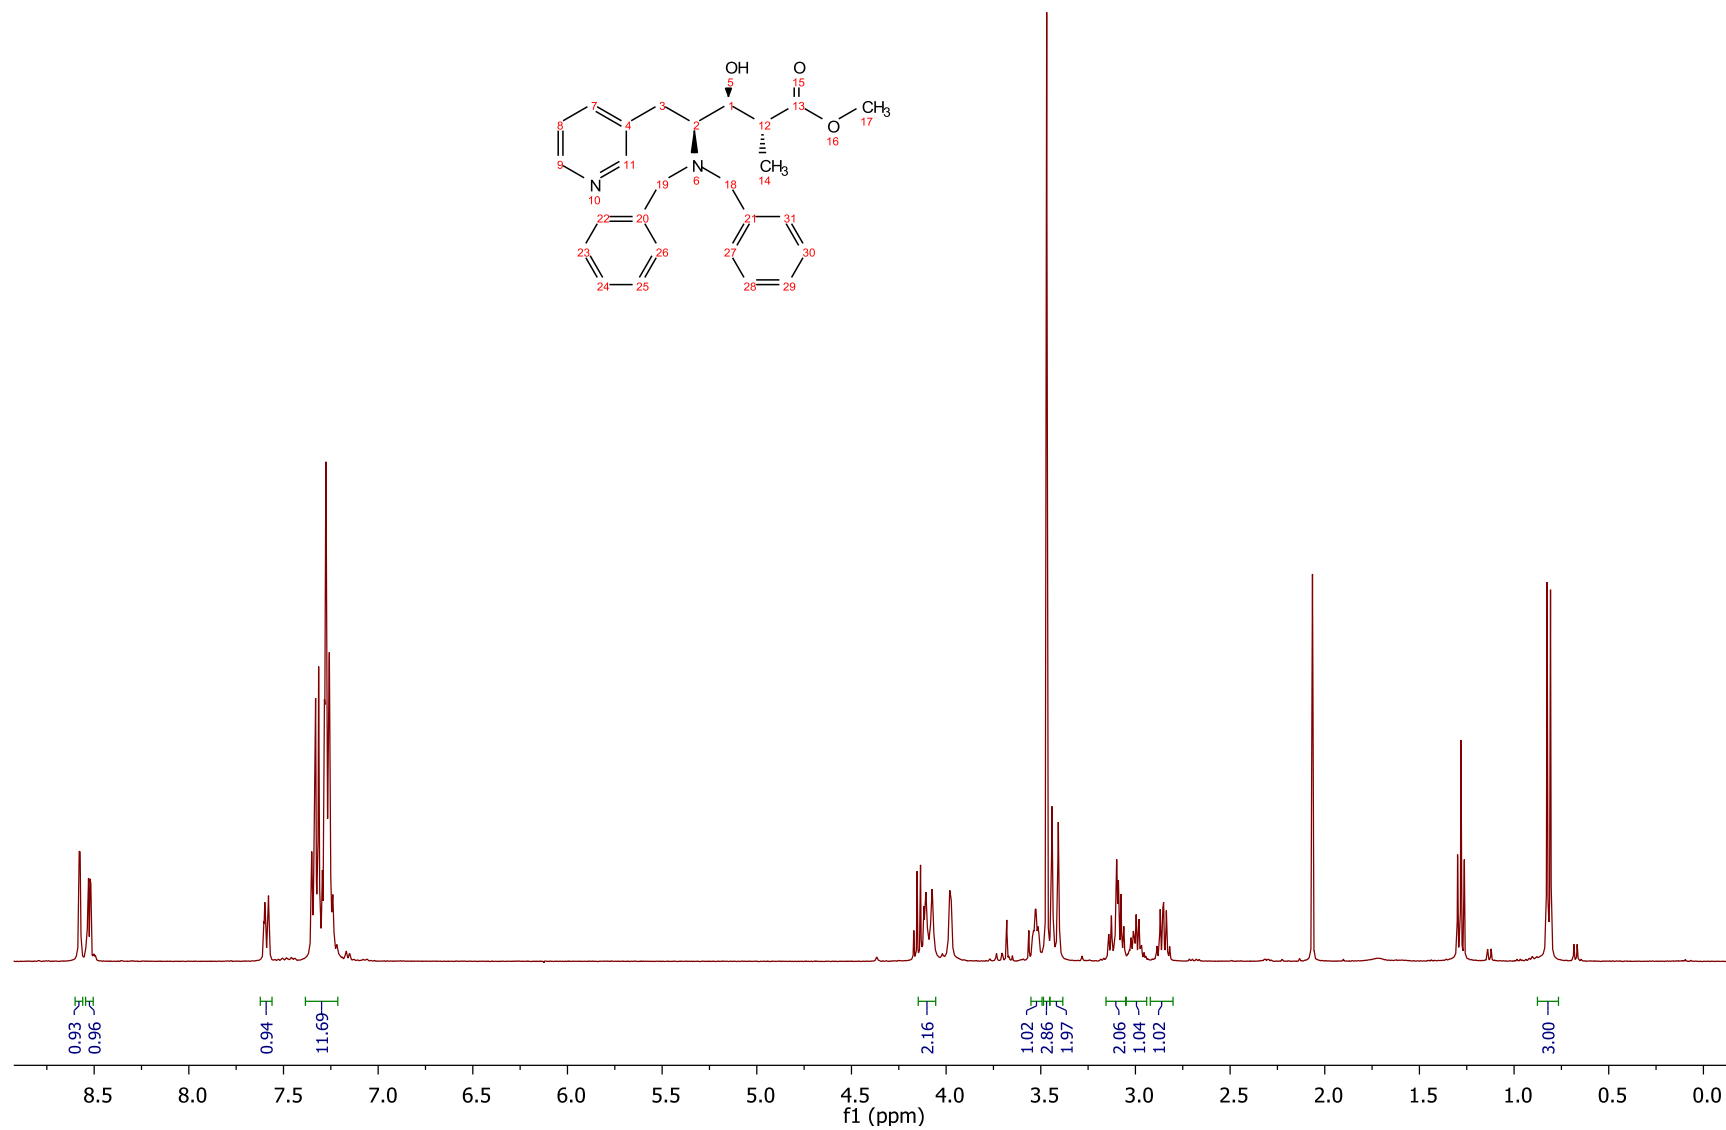

22

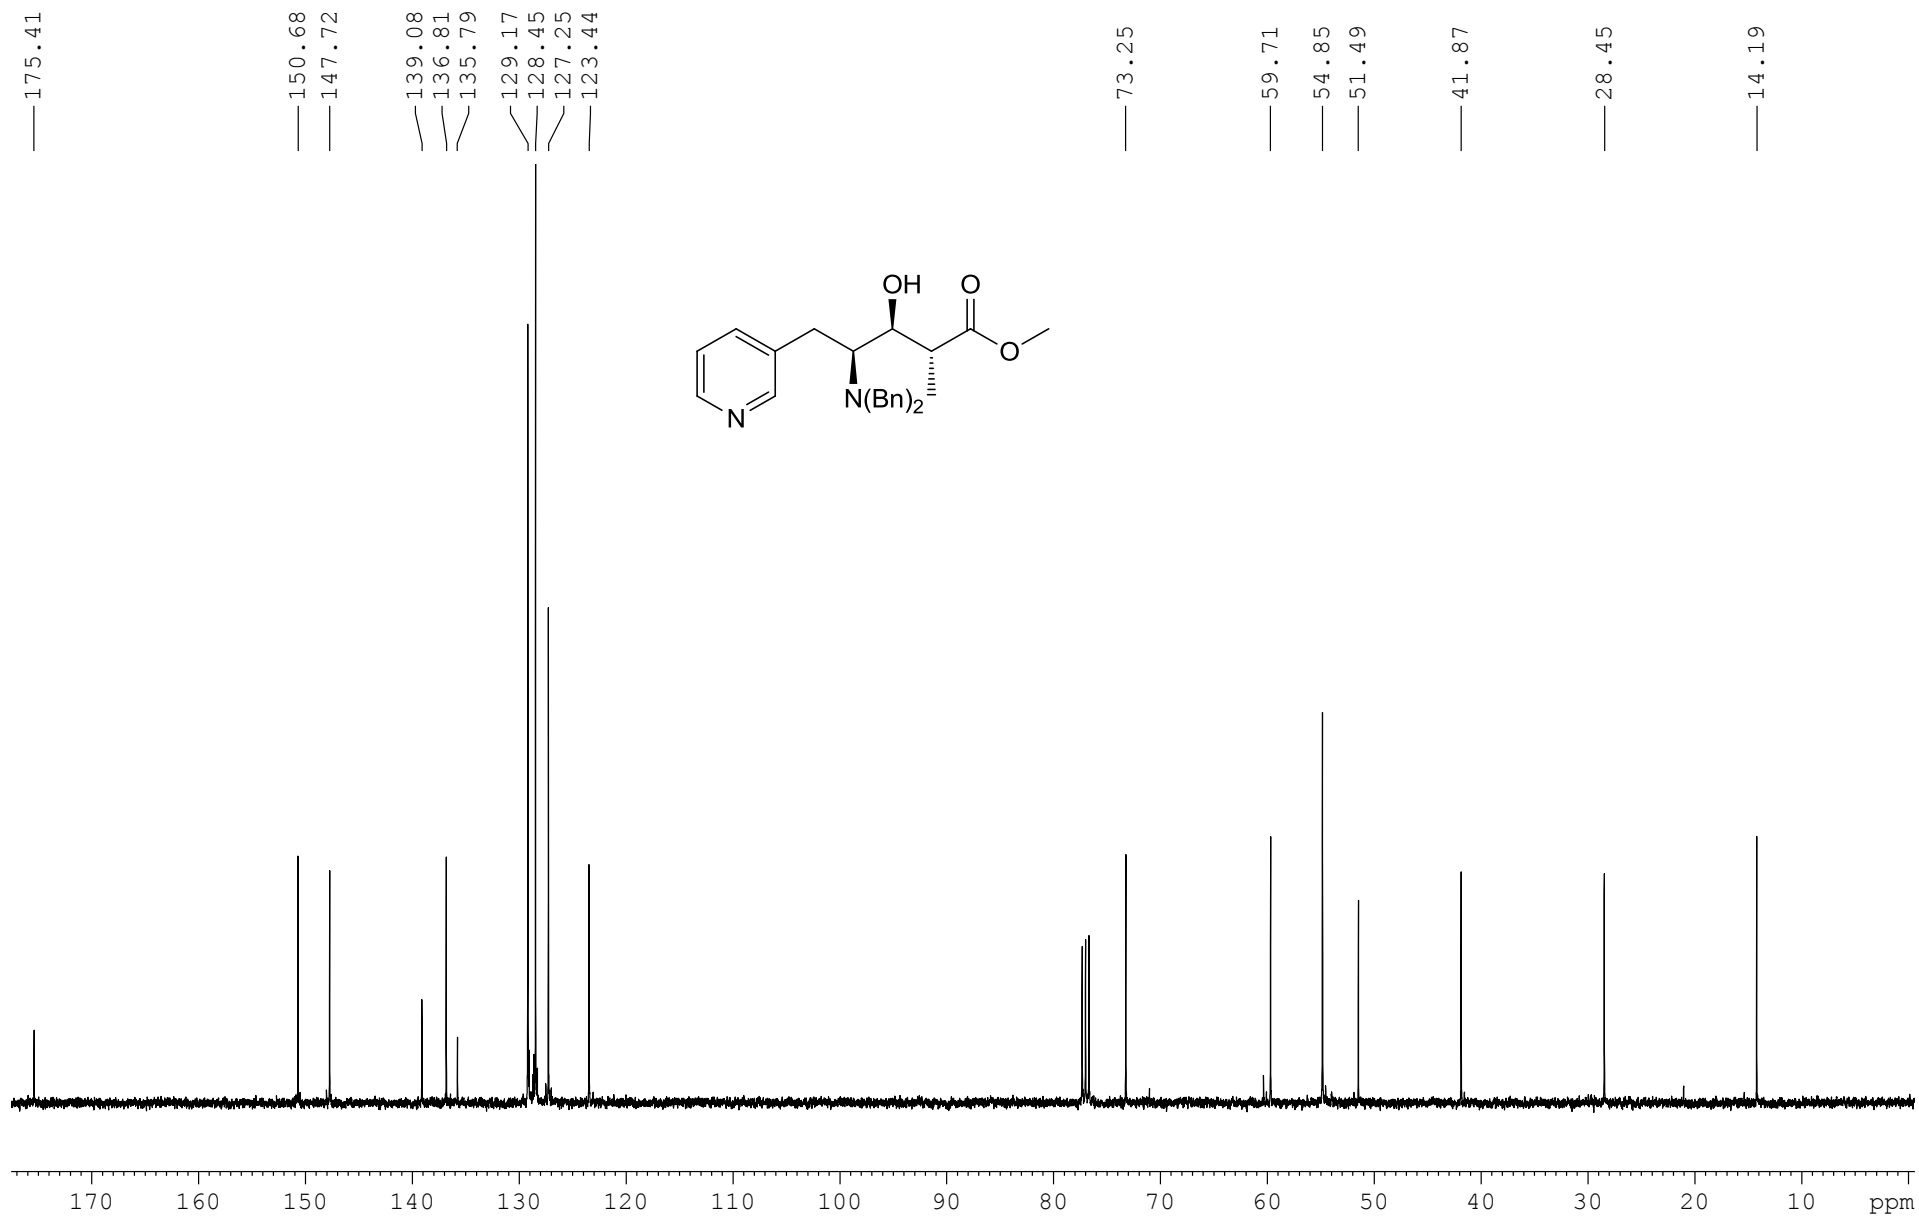



17

5

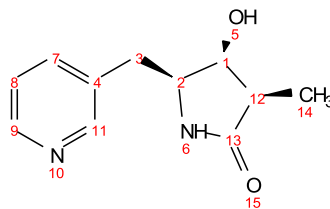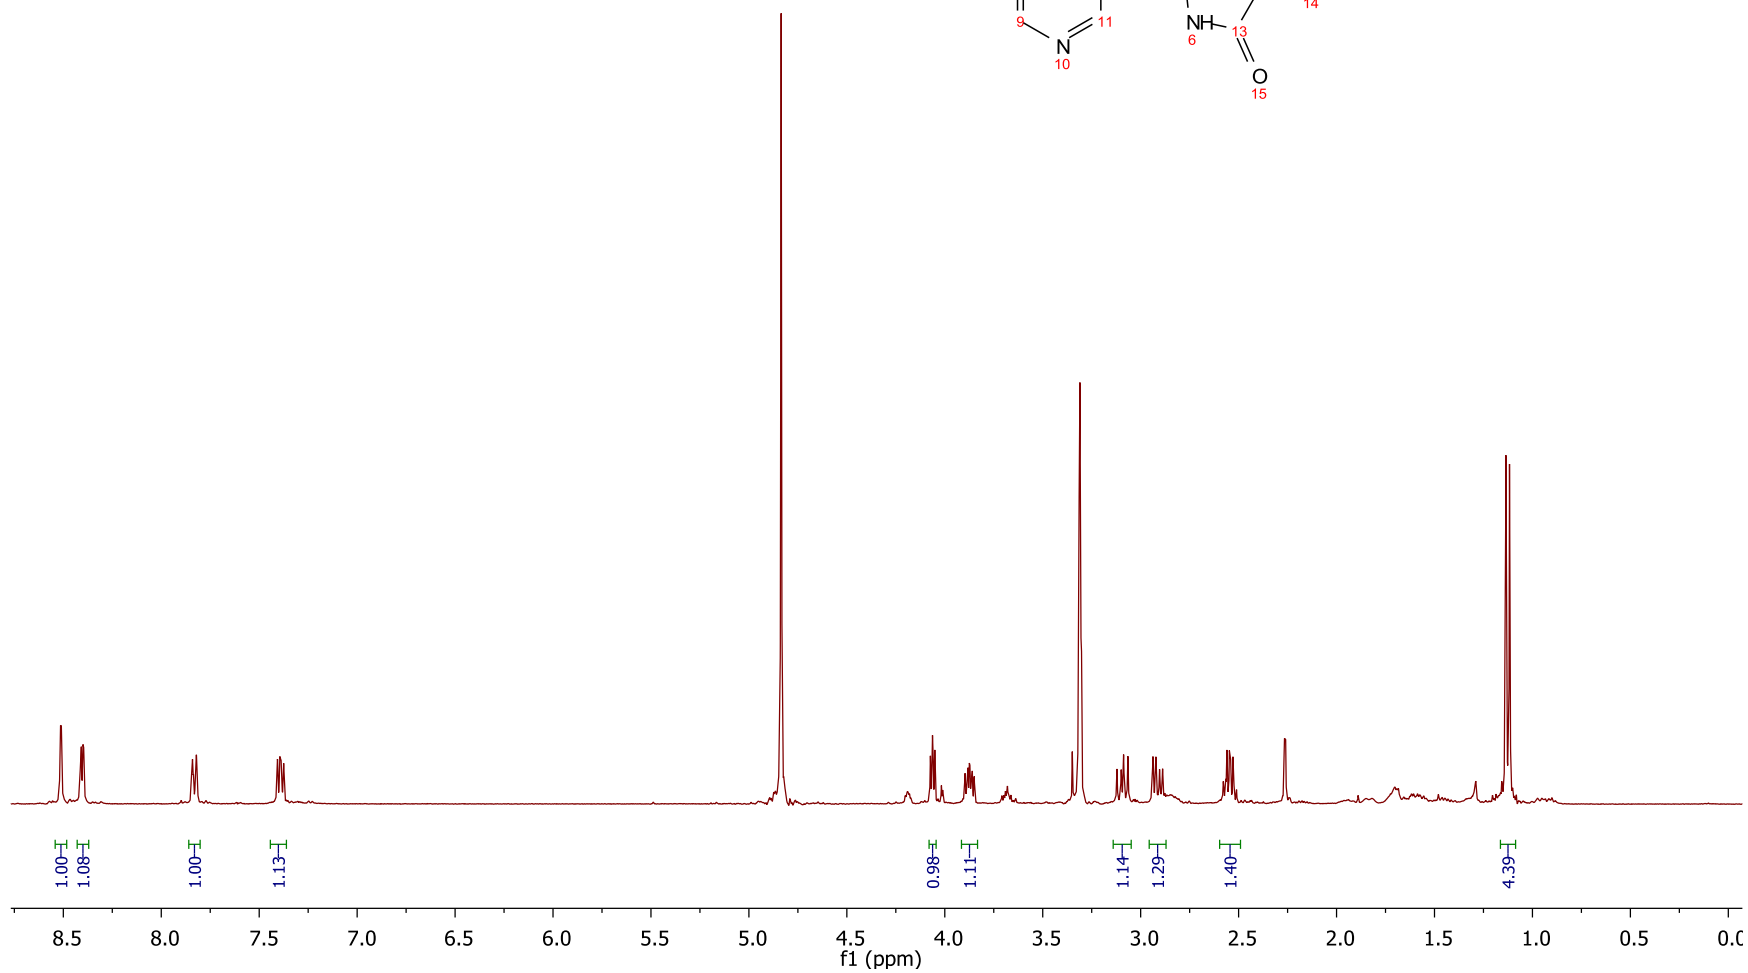

17

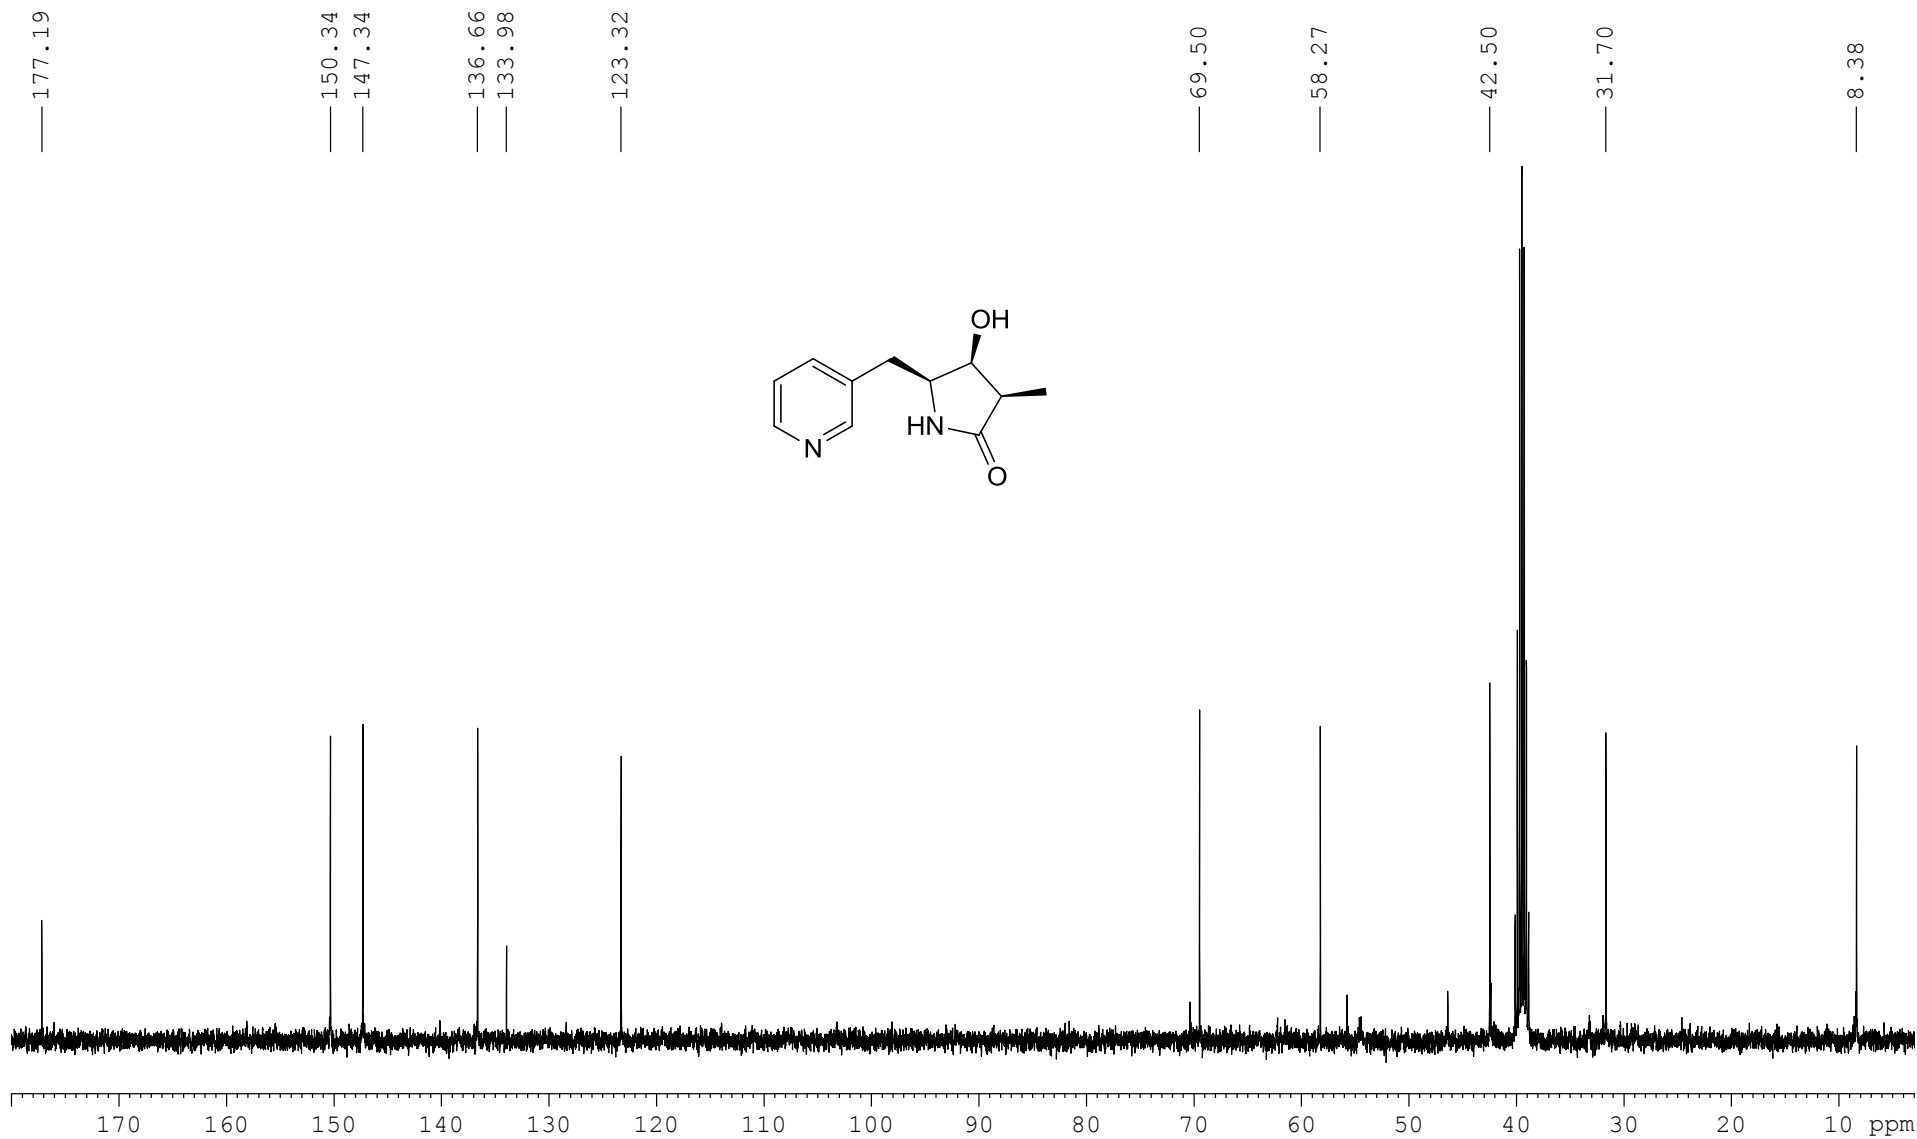

26

3

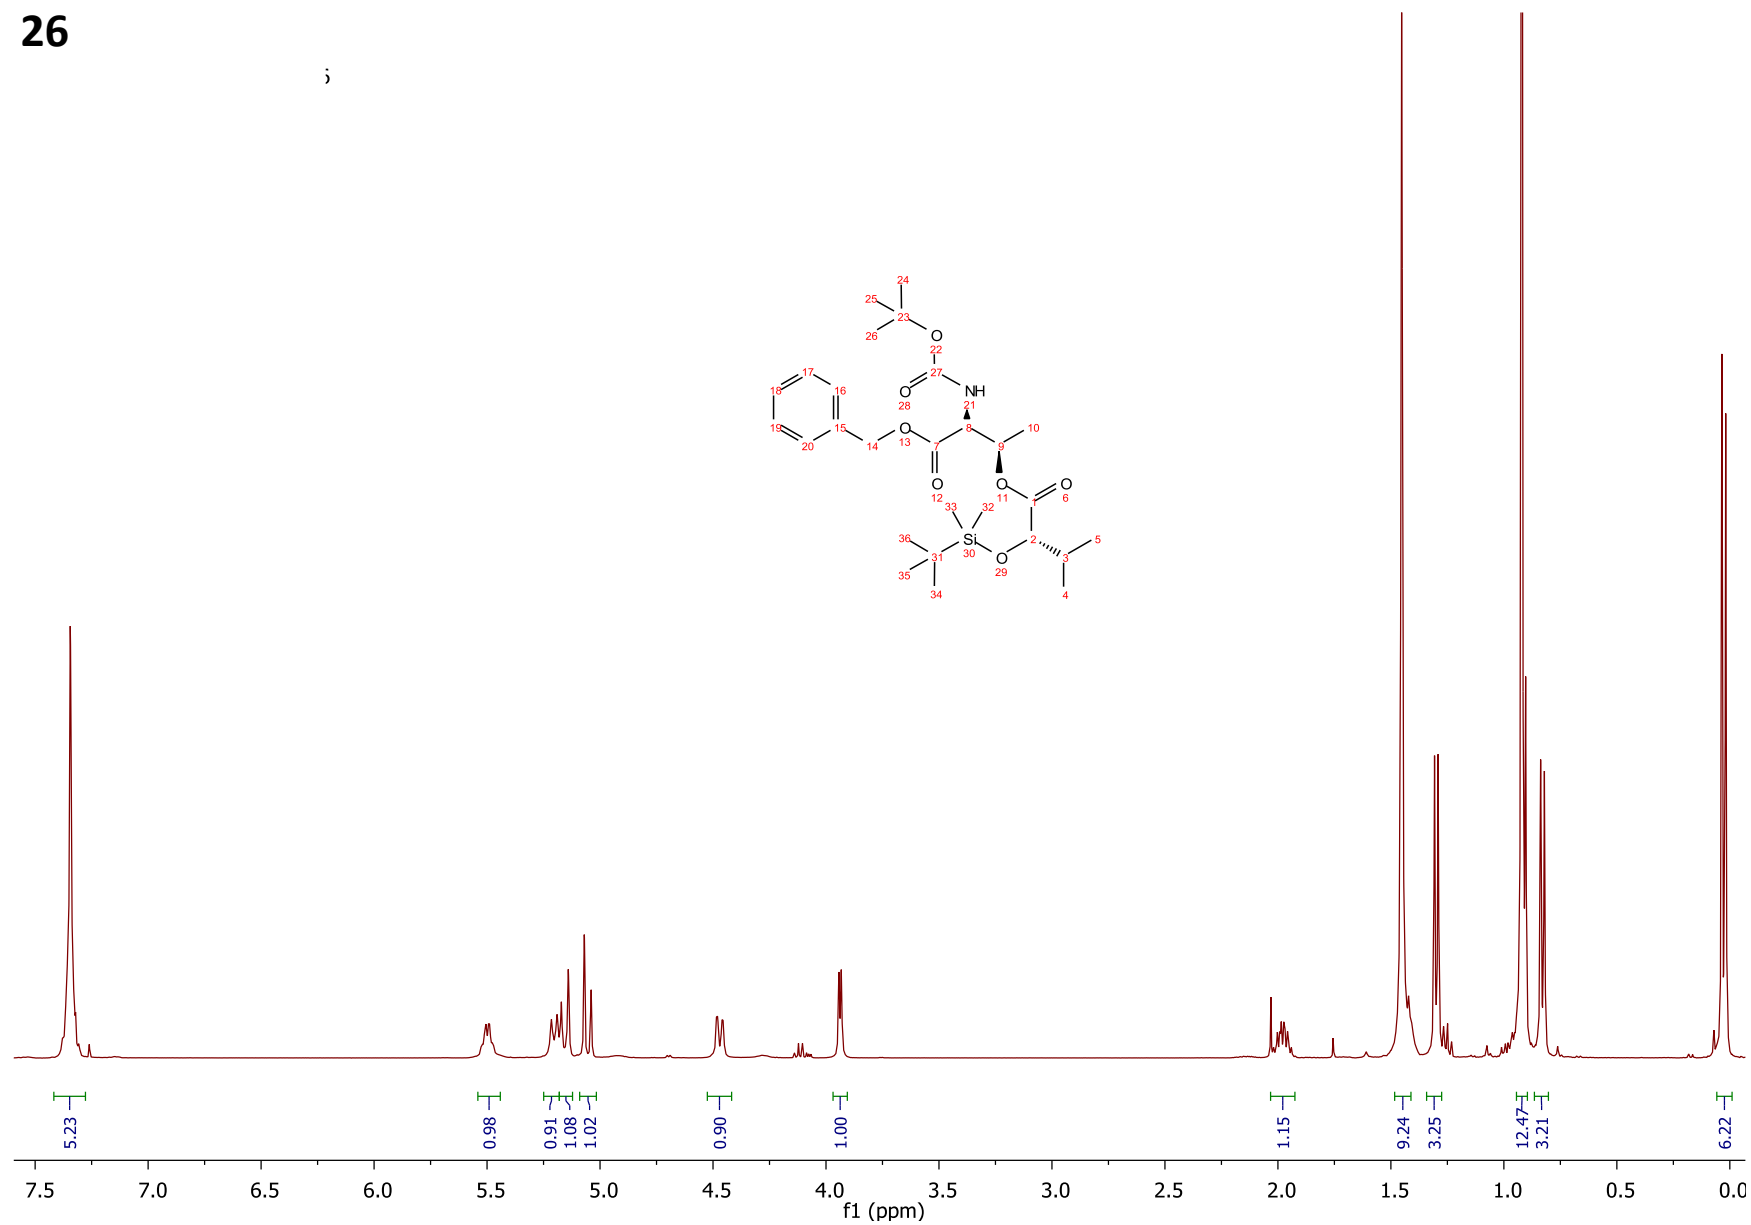

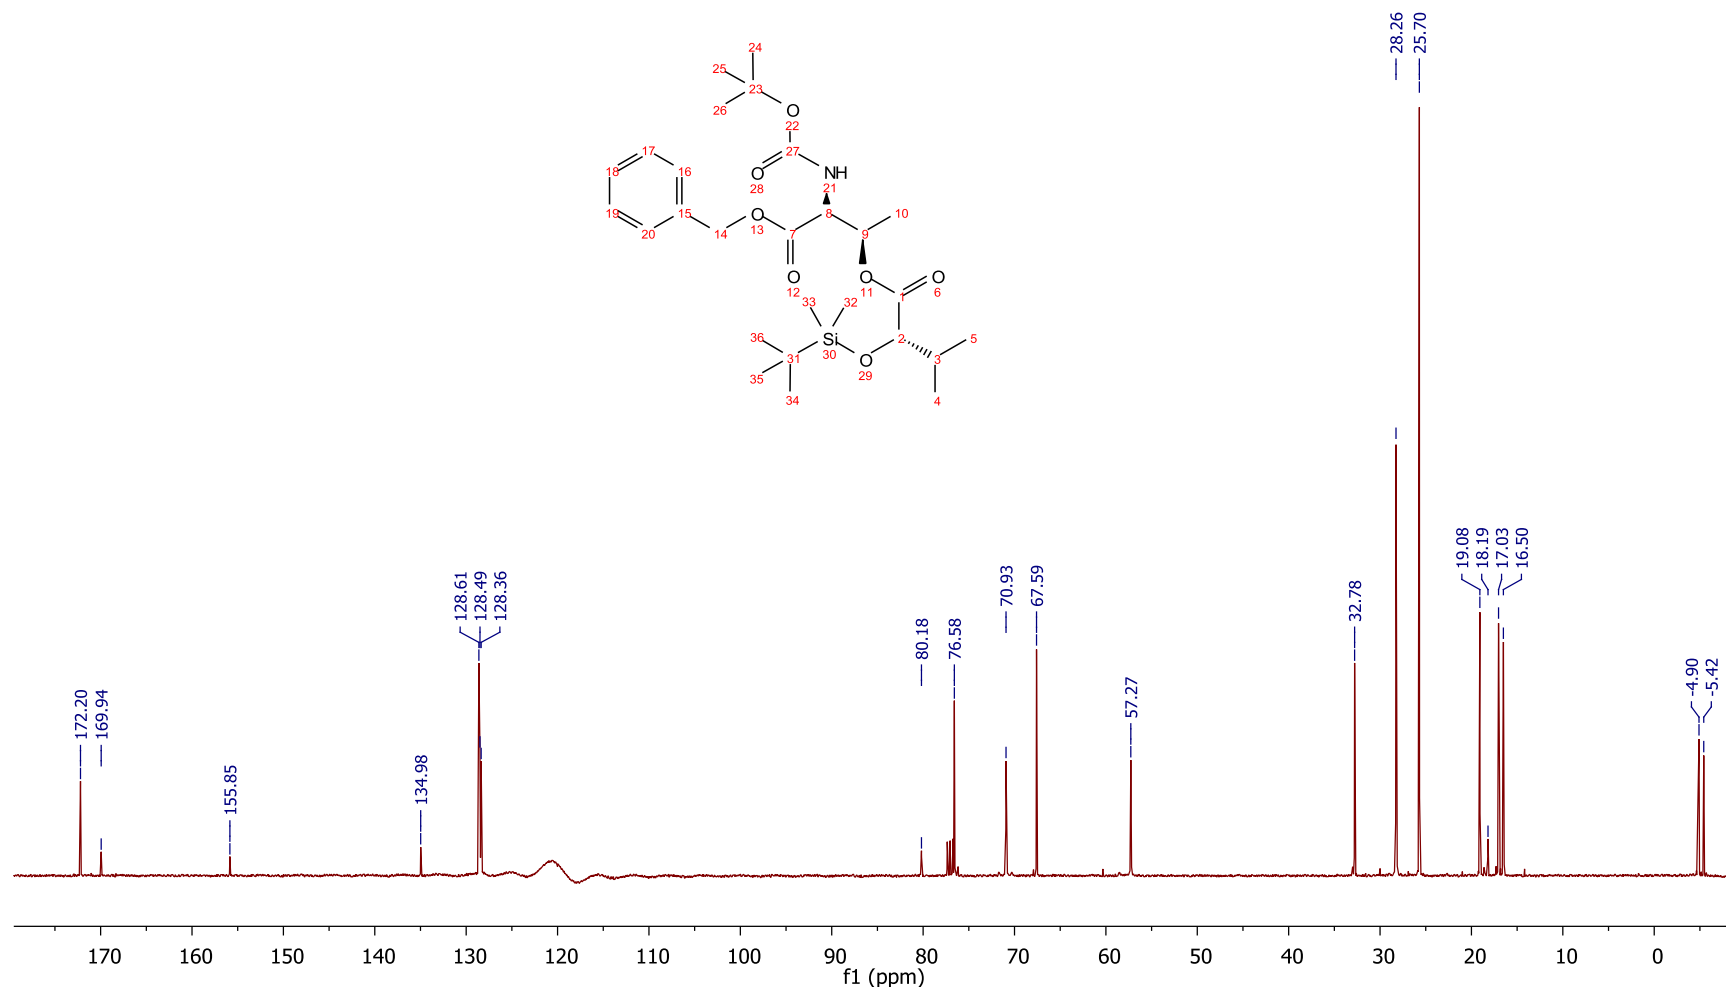

25

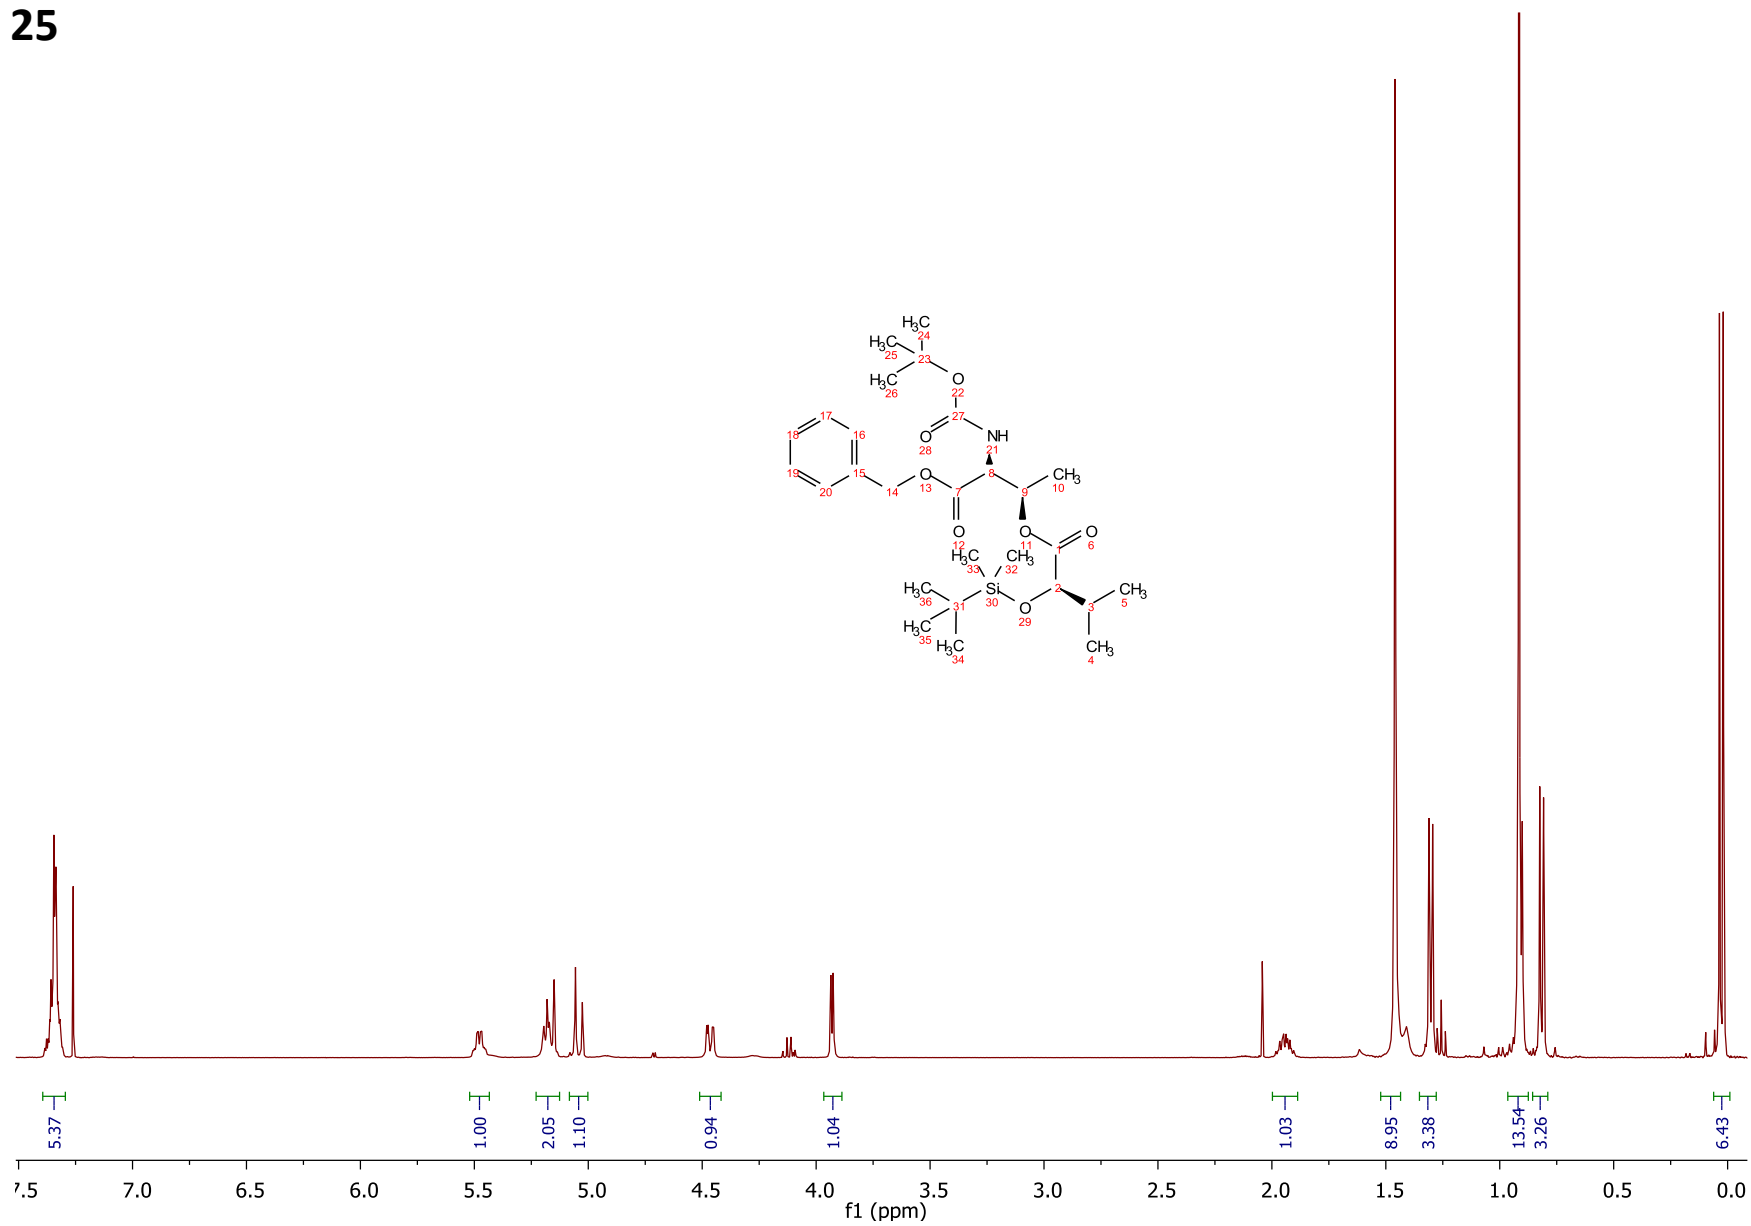

25

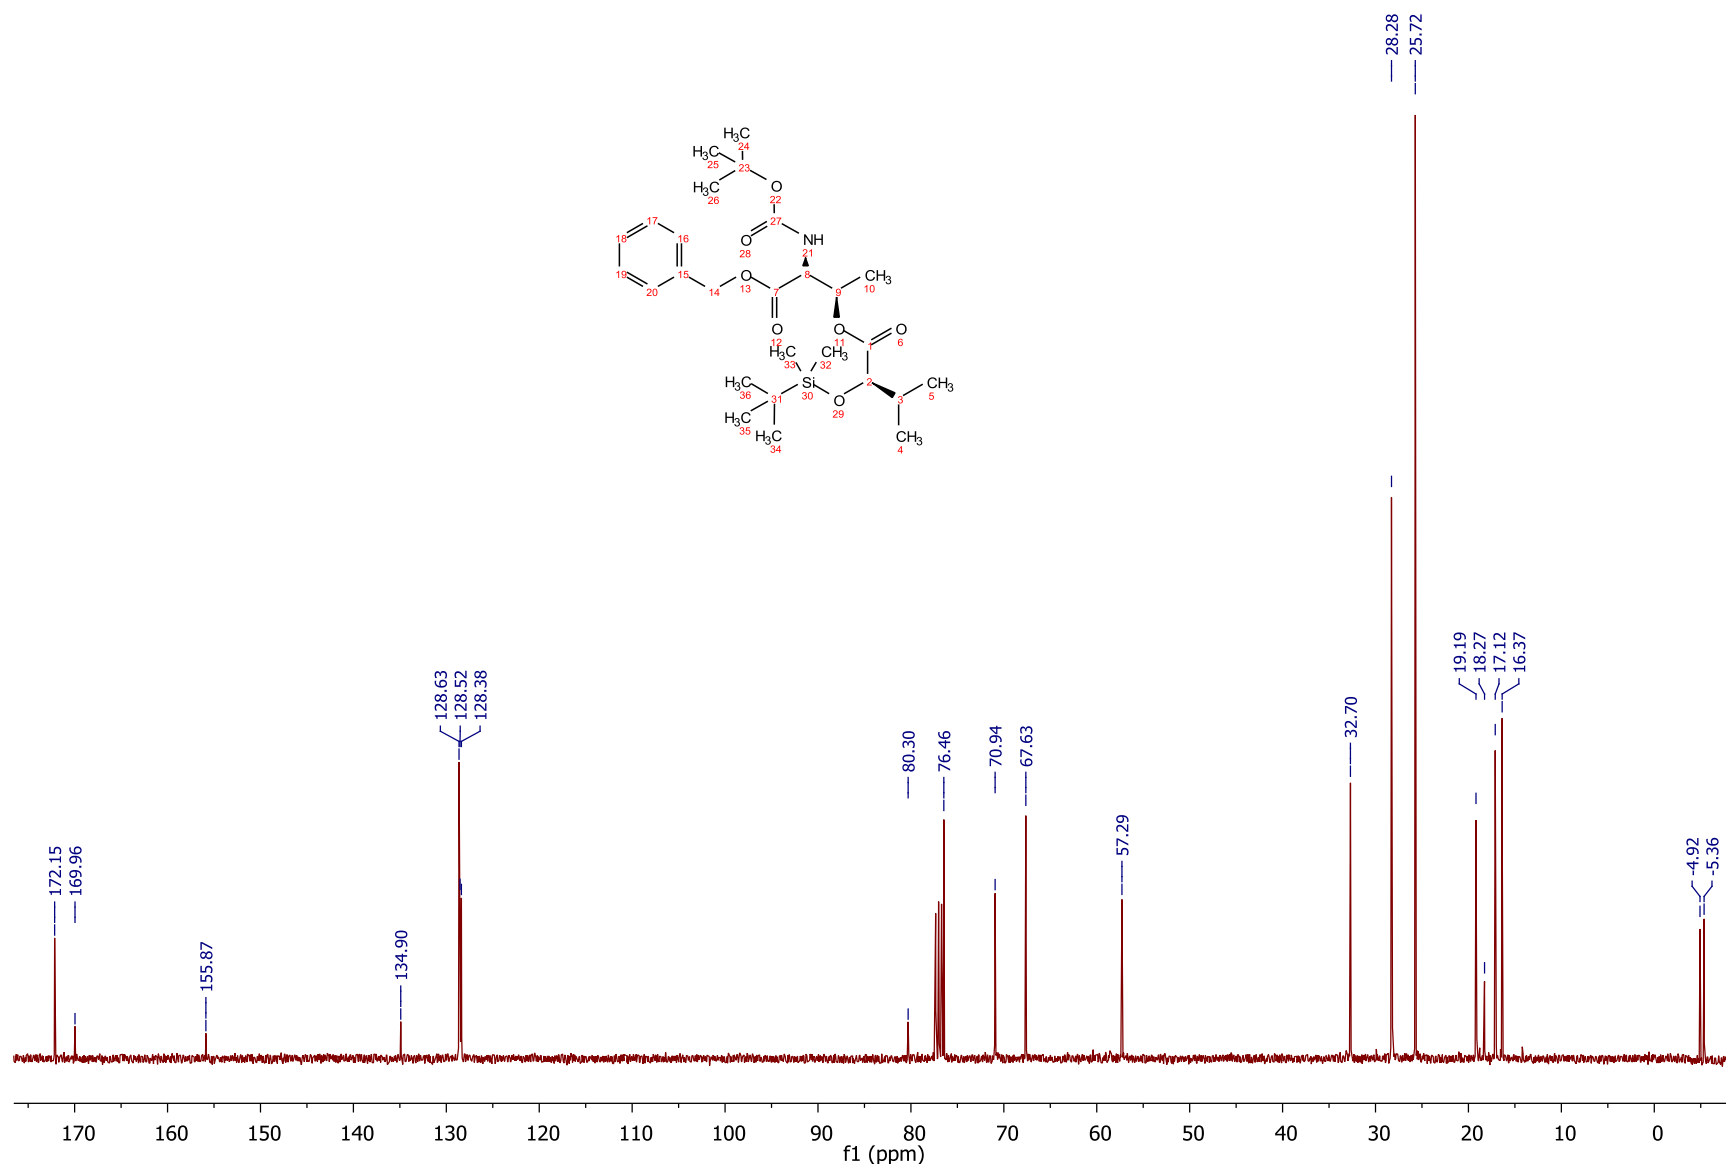

epi-6

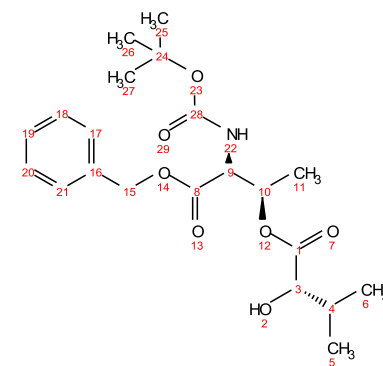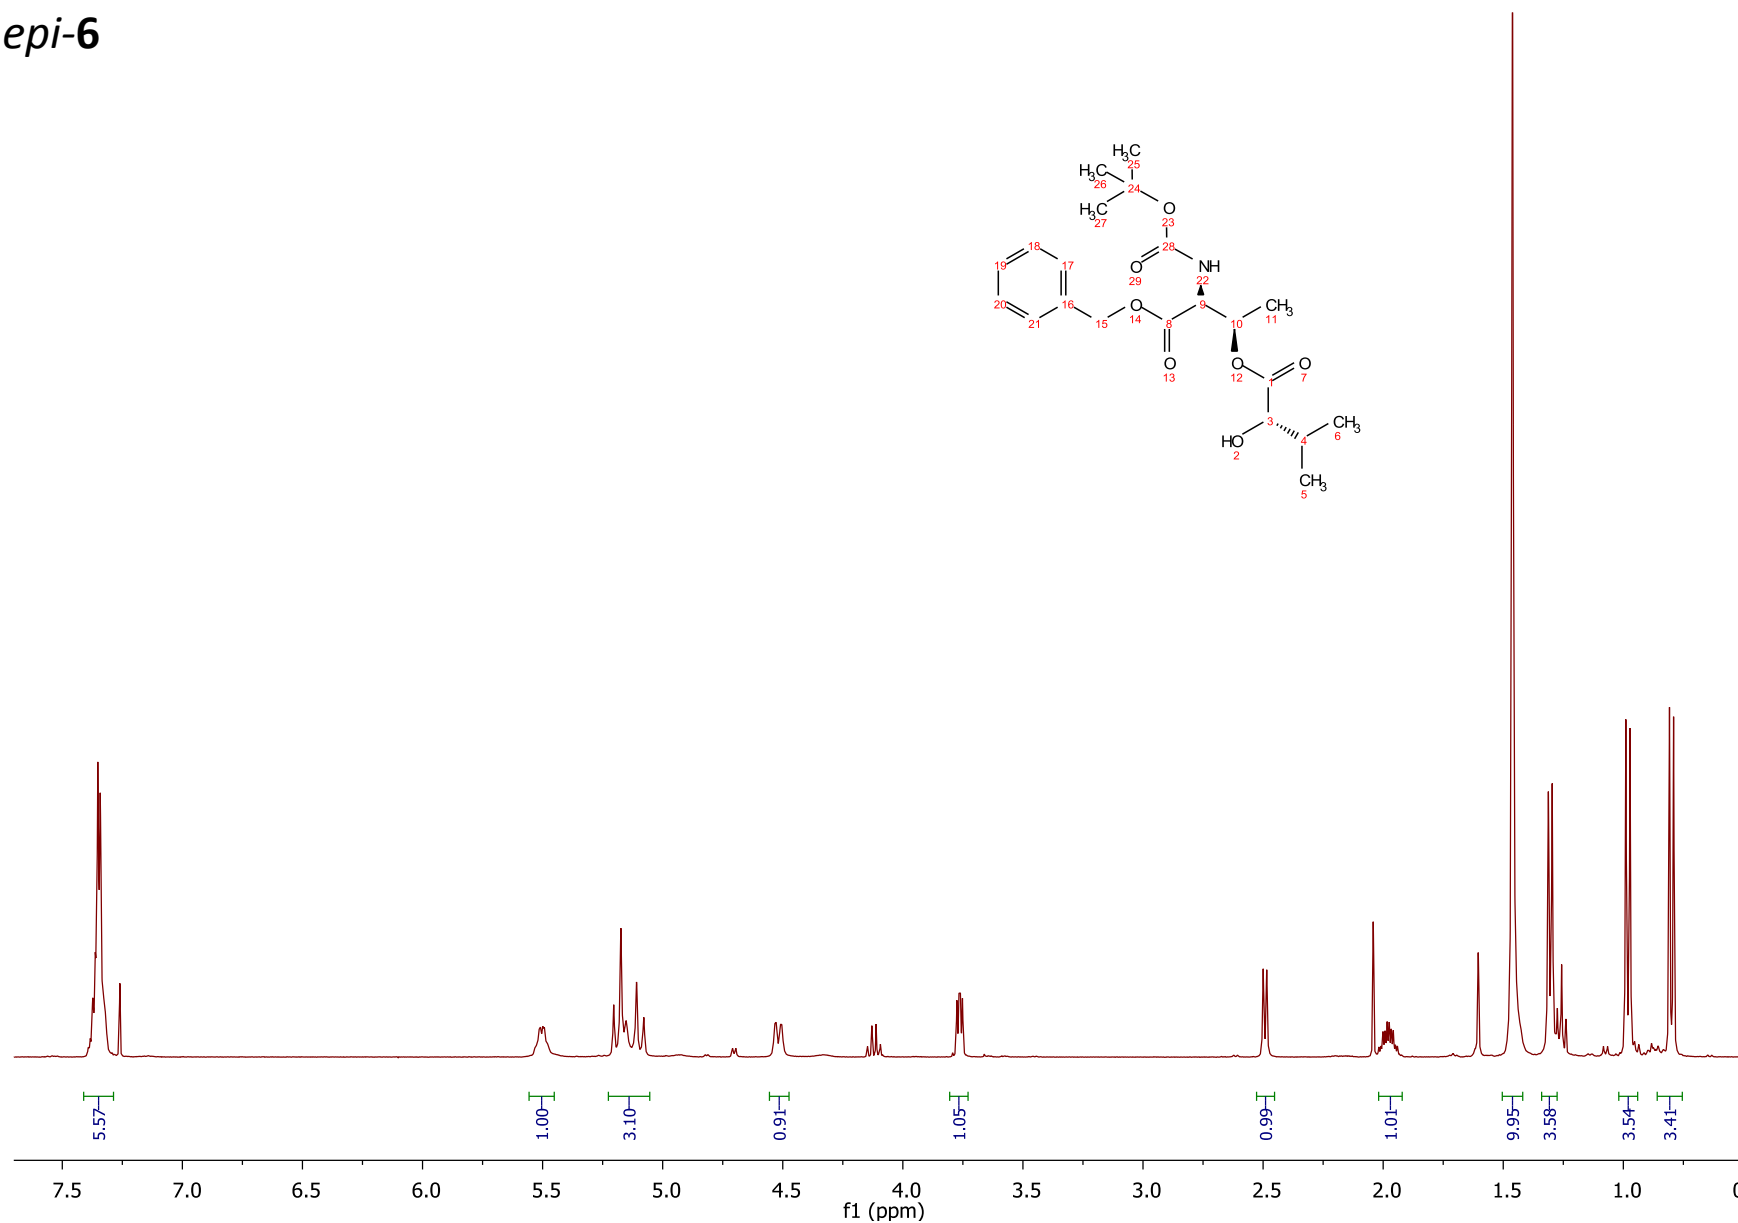

epi-6

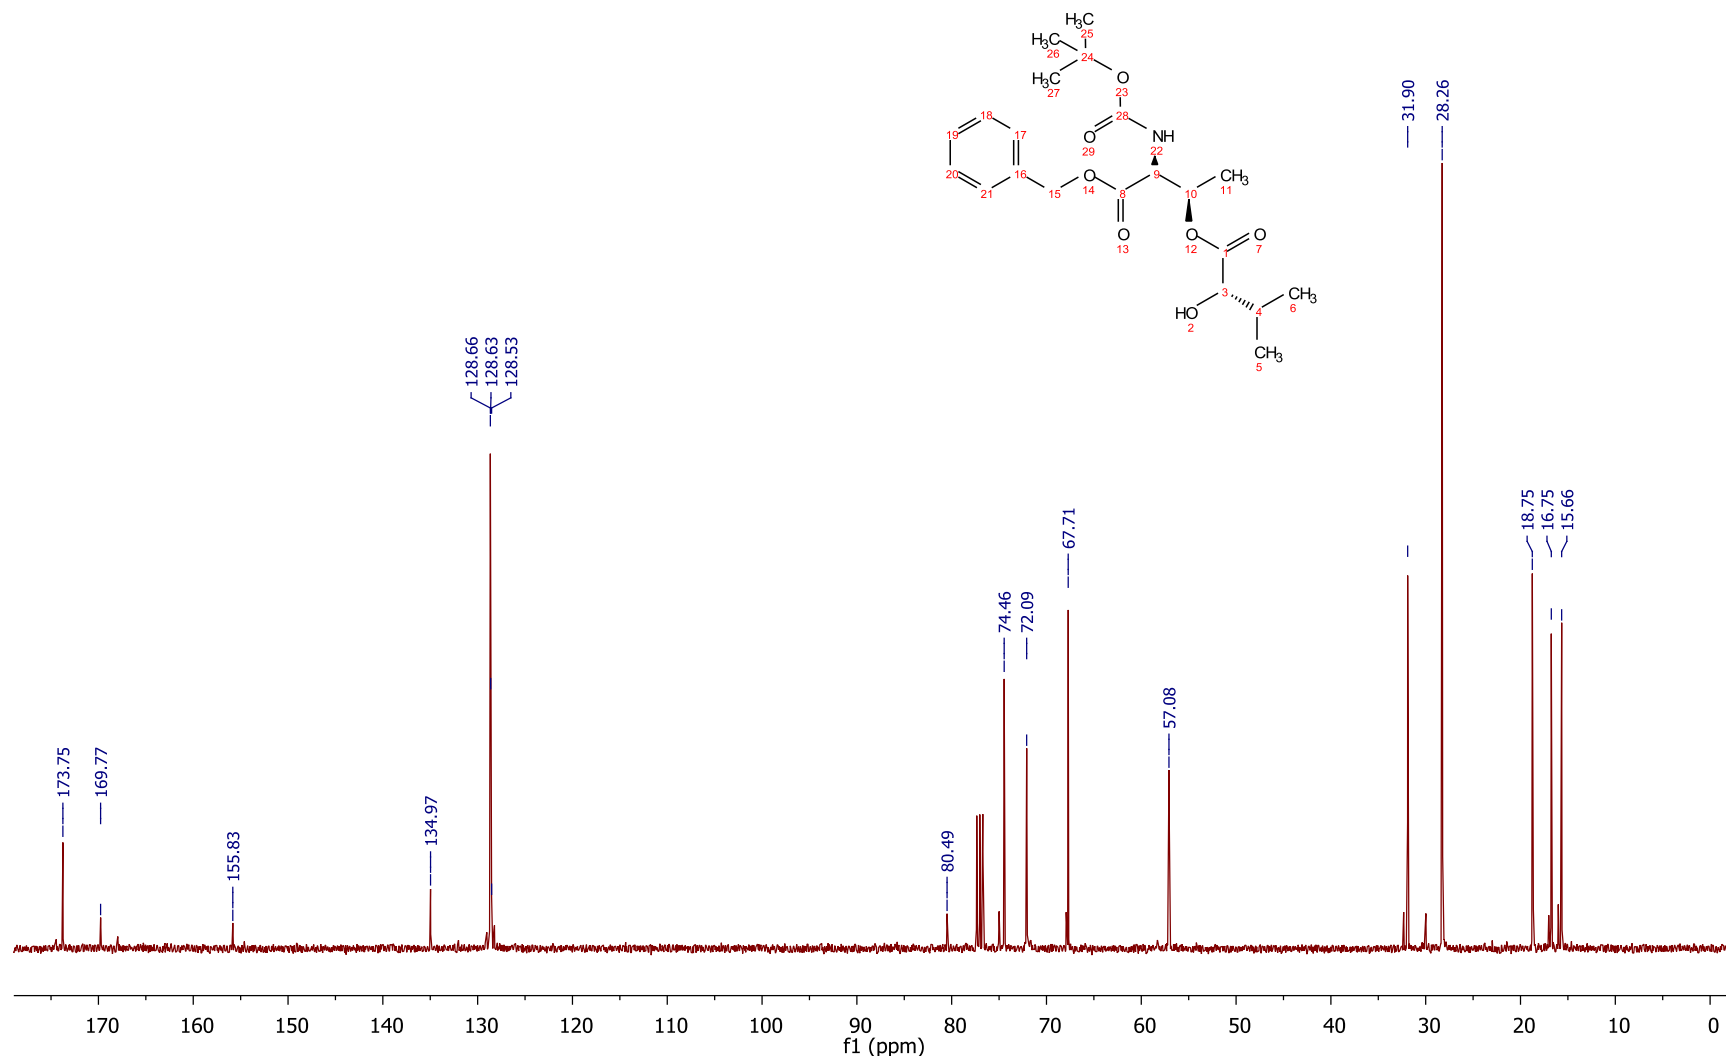



6

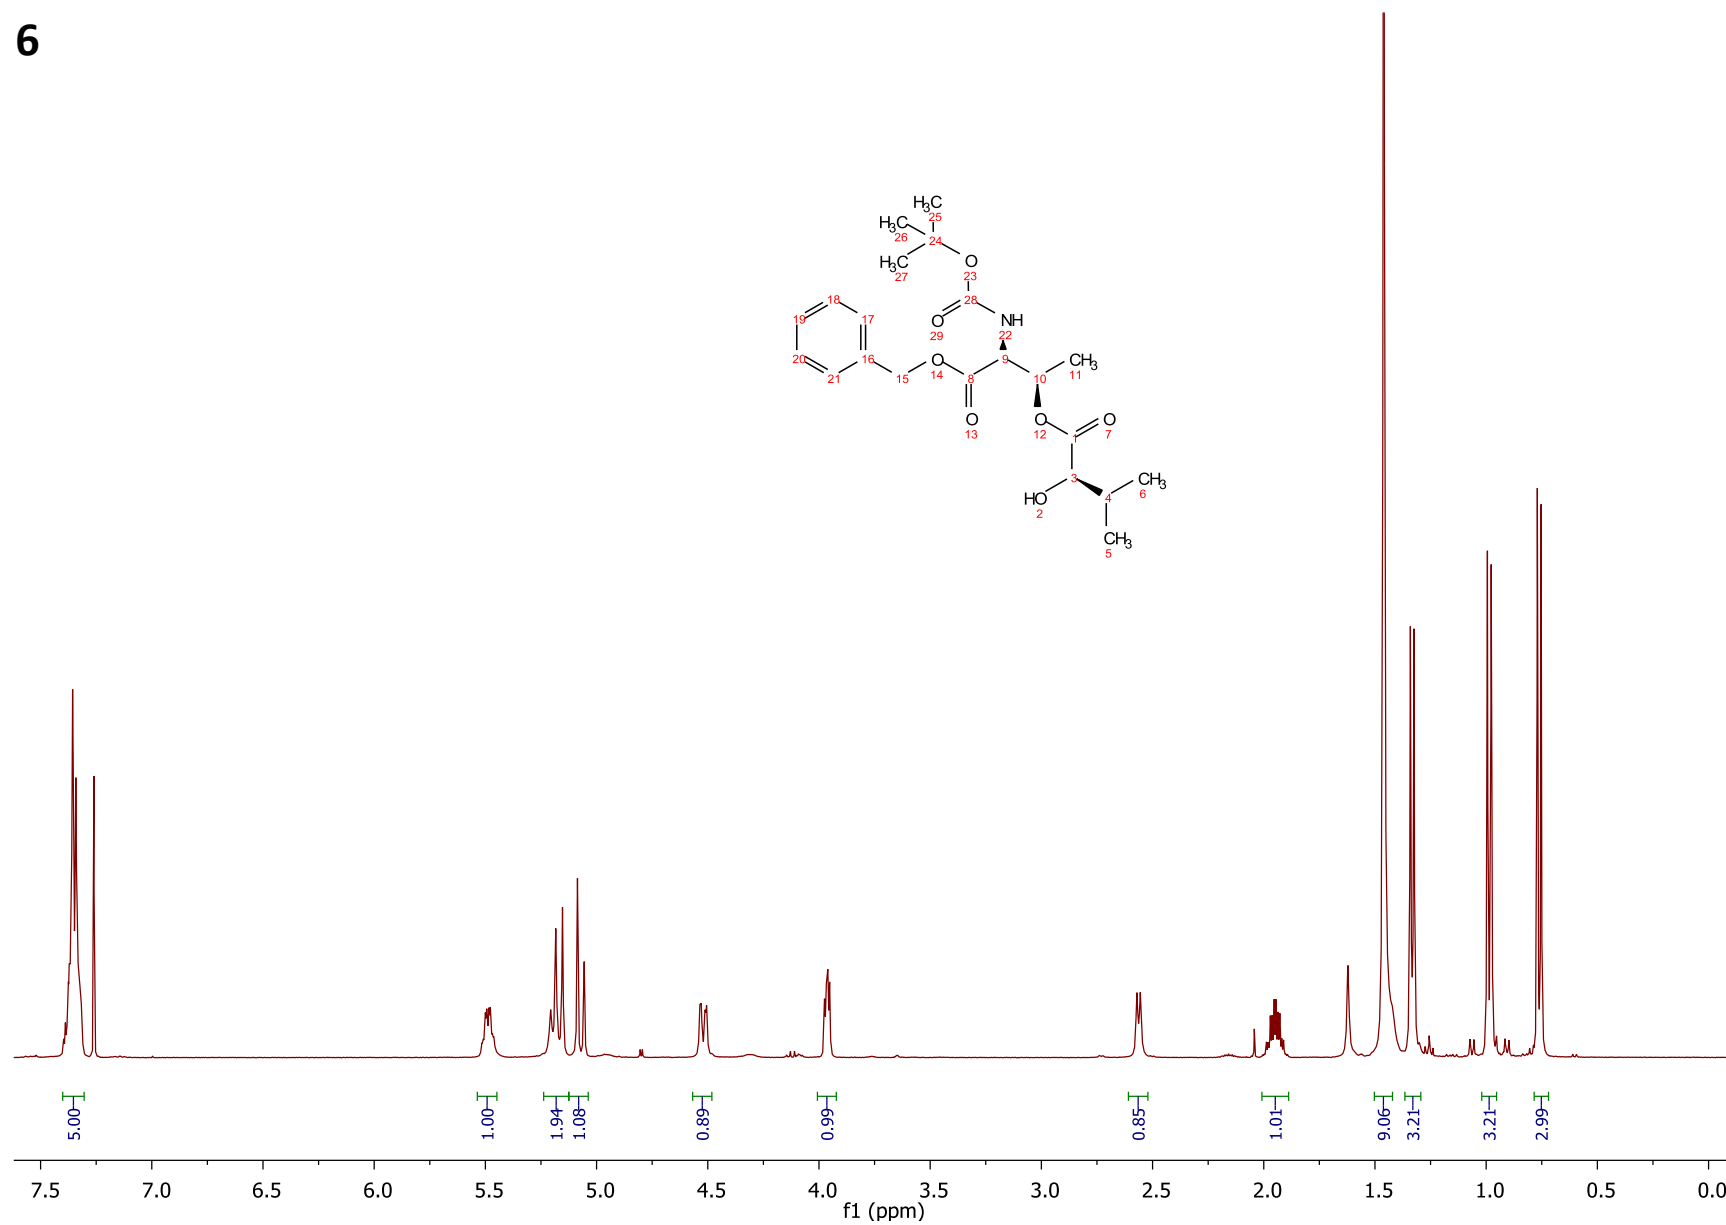

6

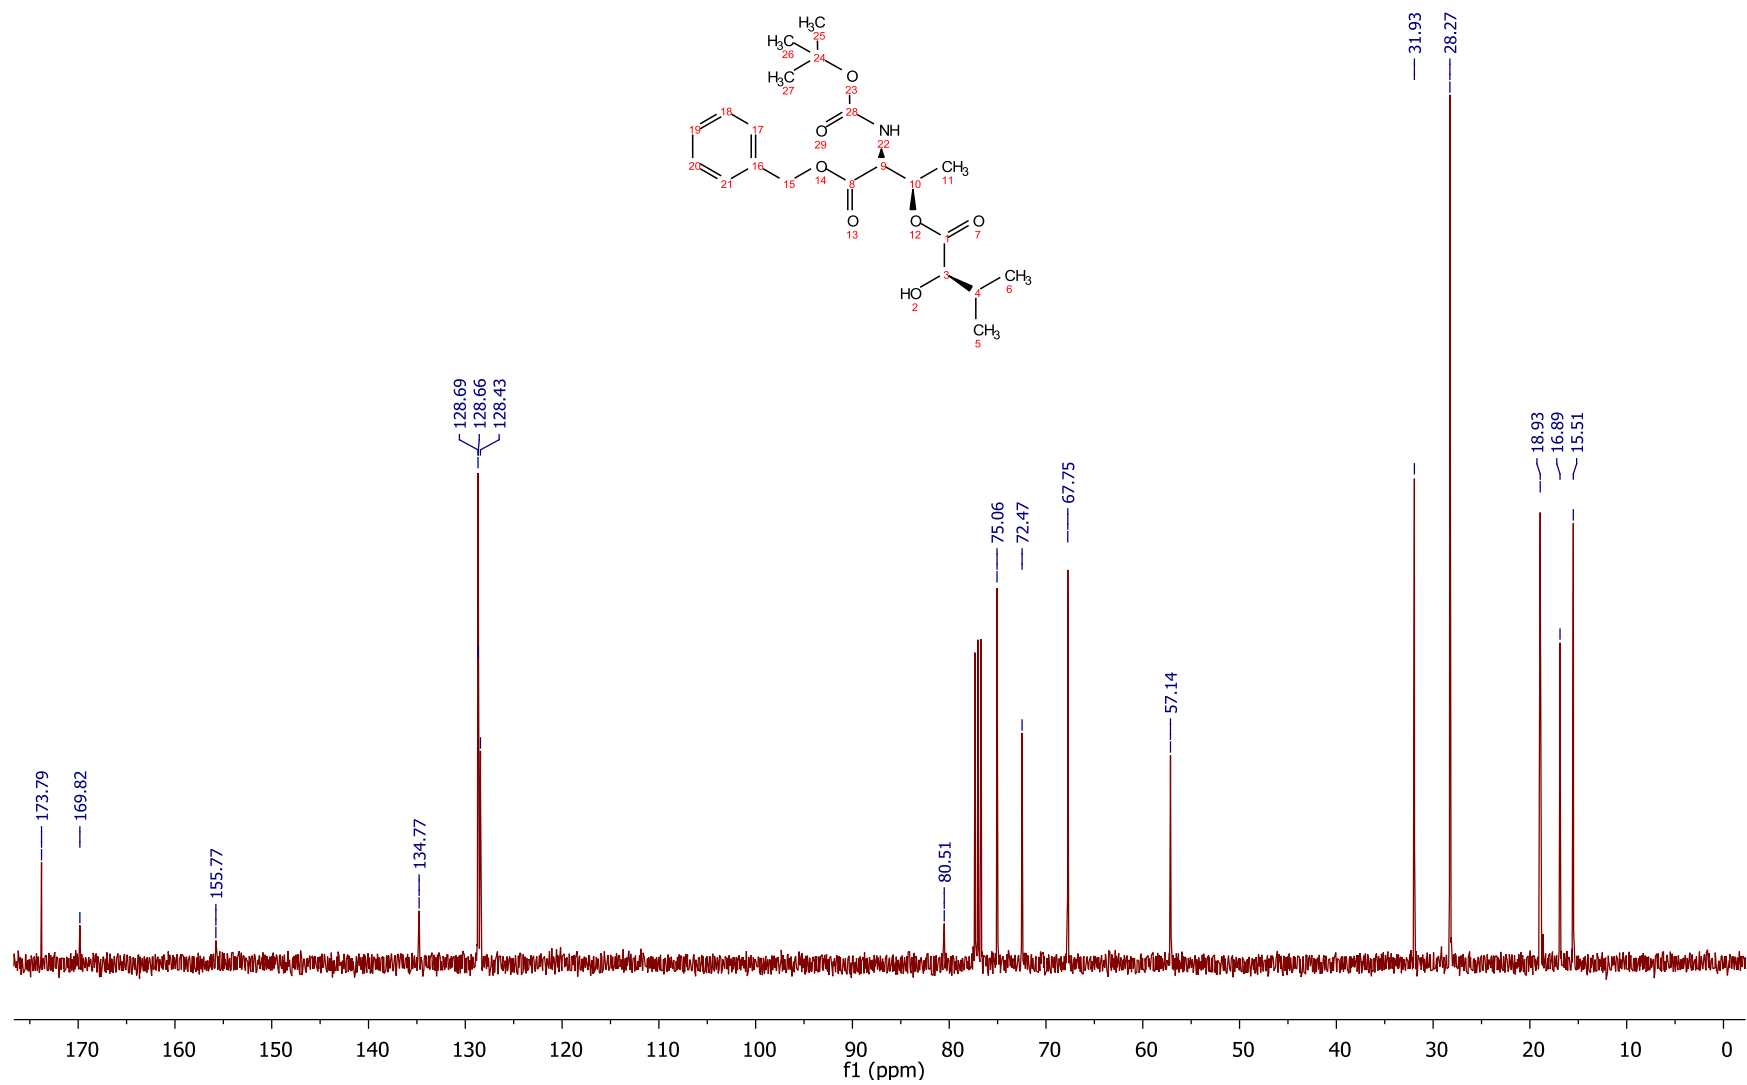

epi-19

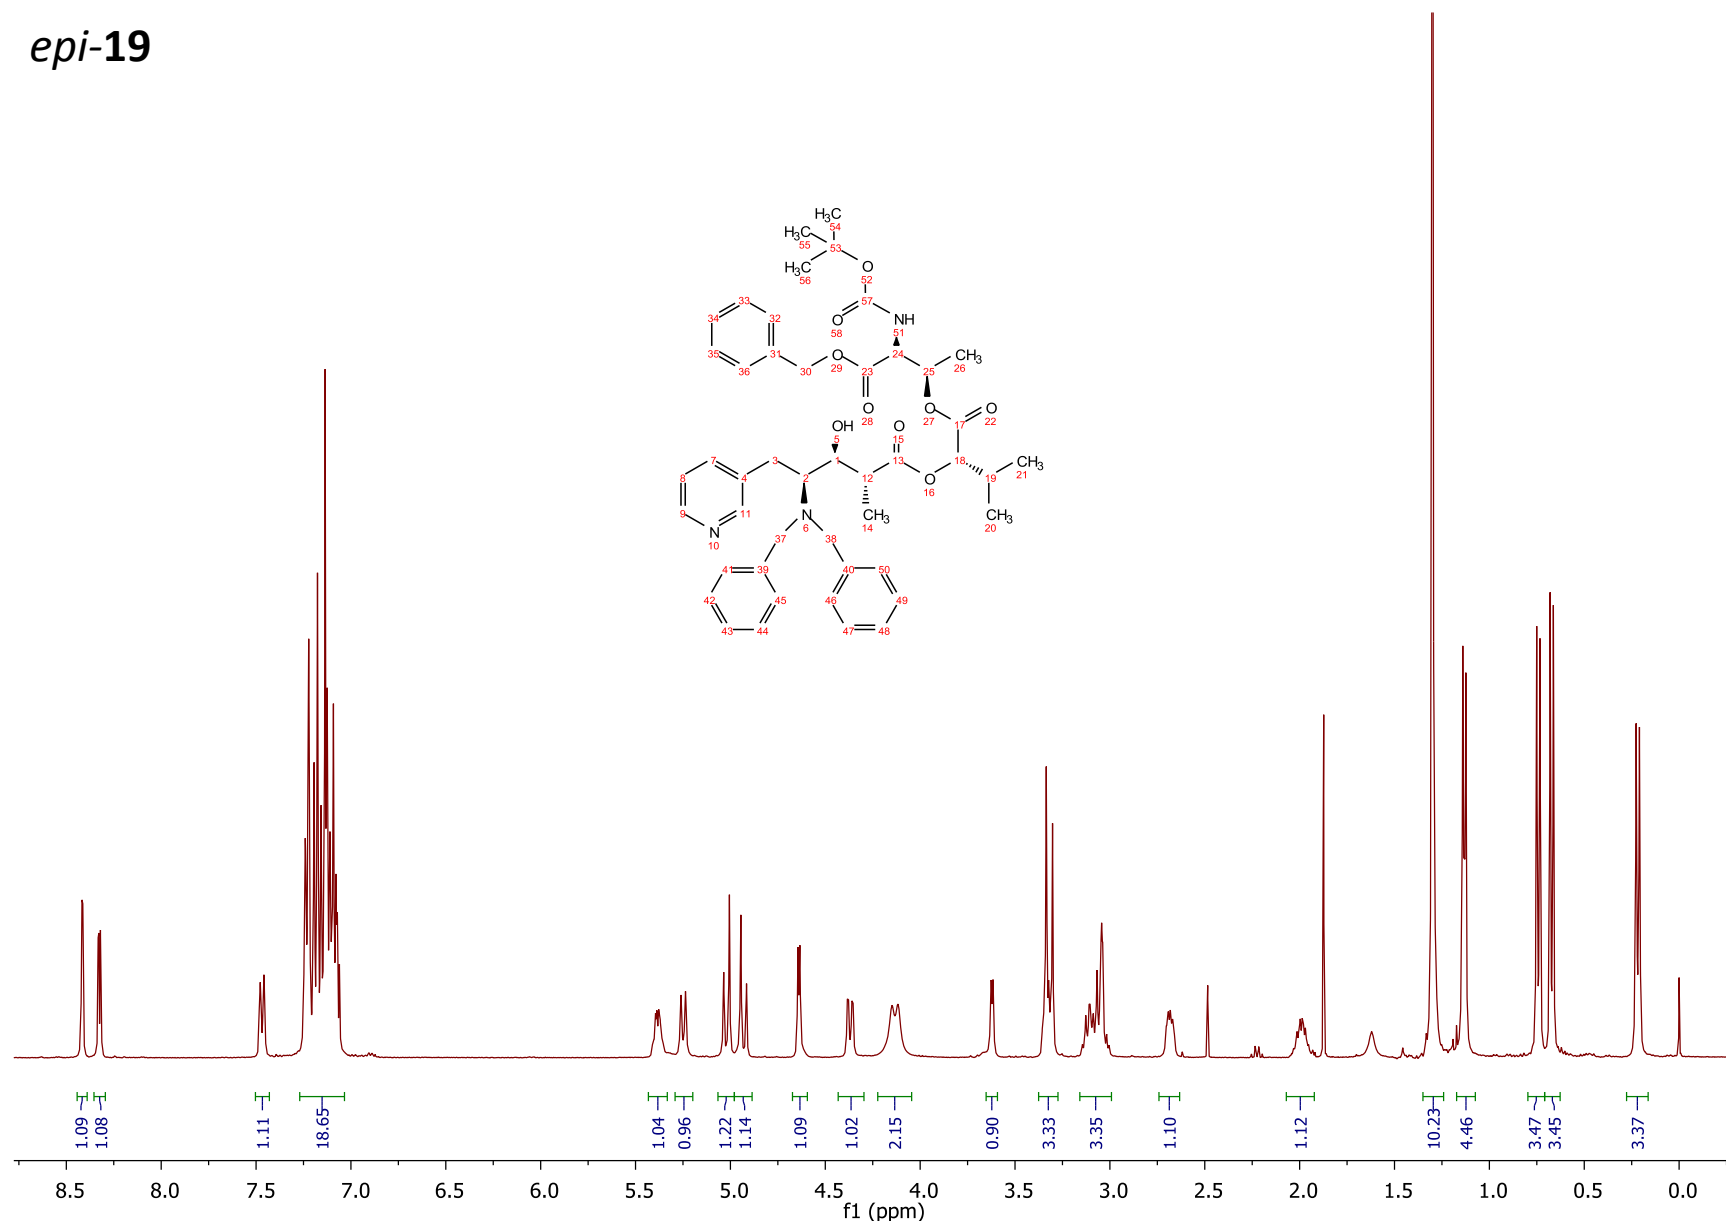

epi-19

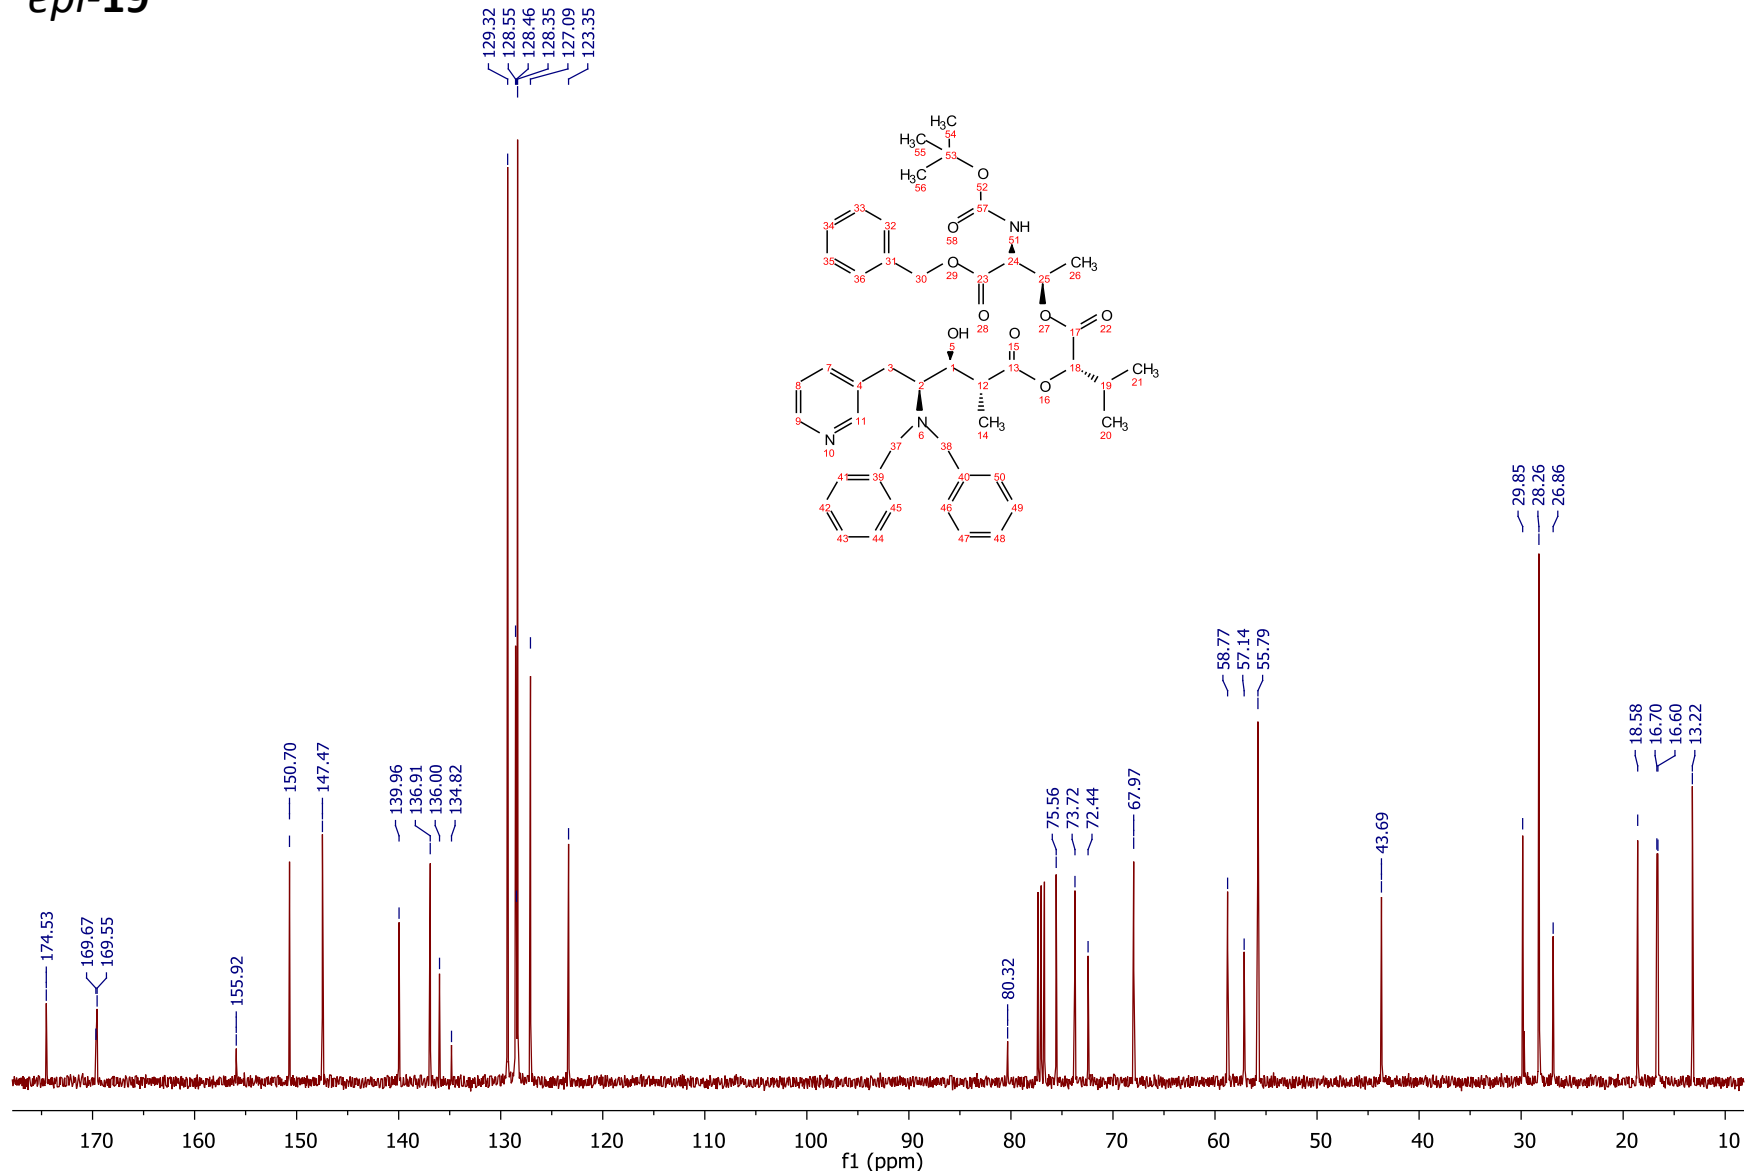

19

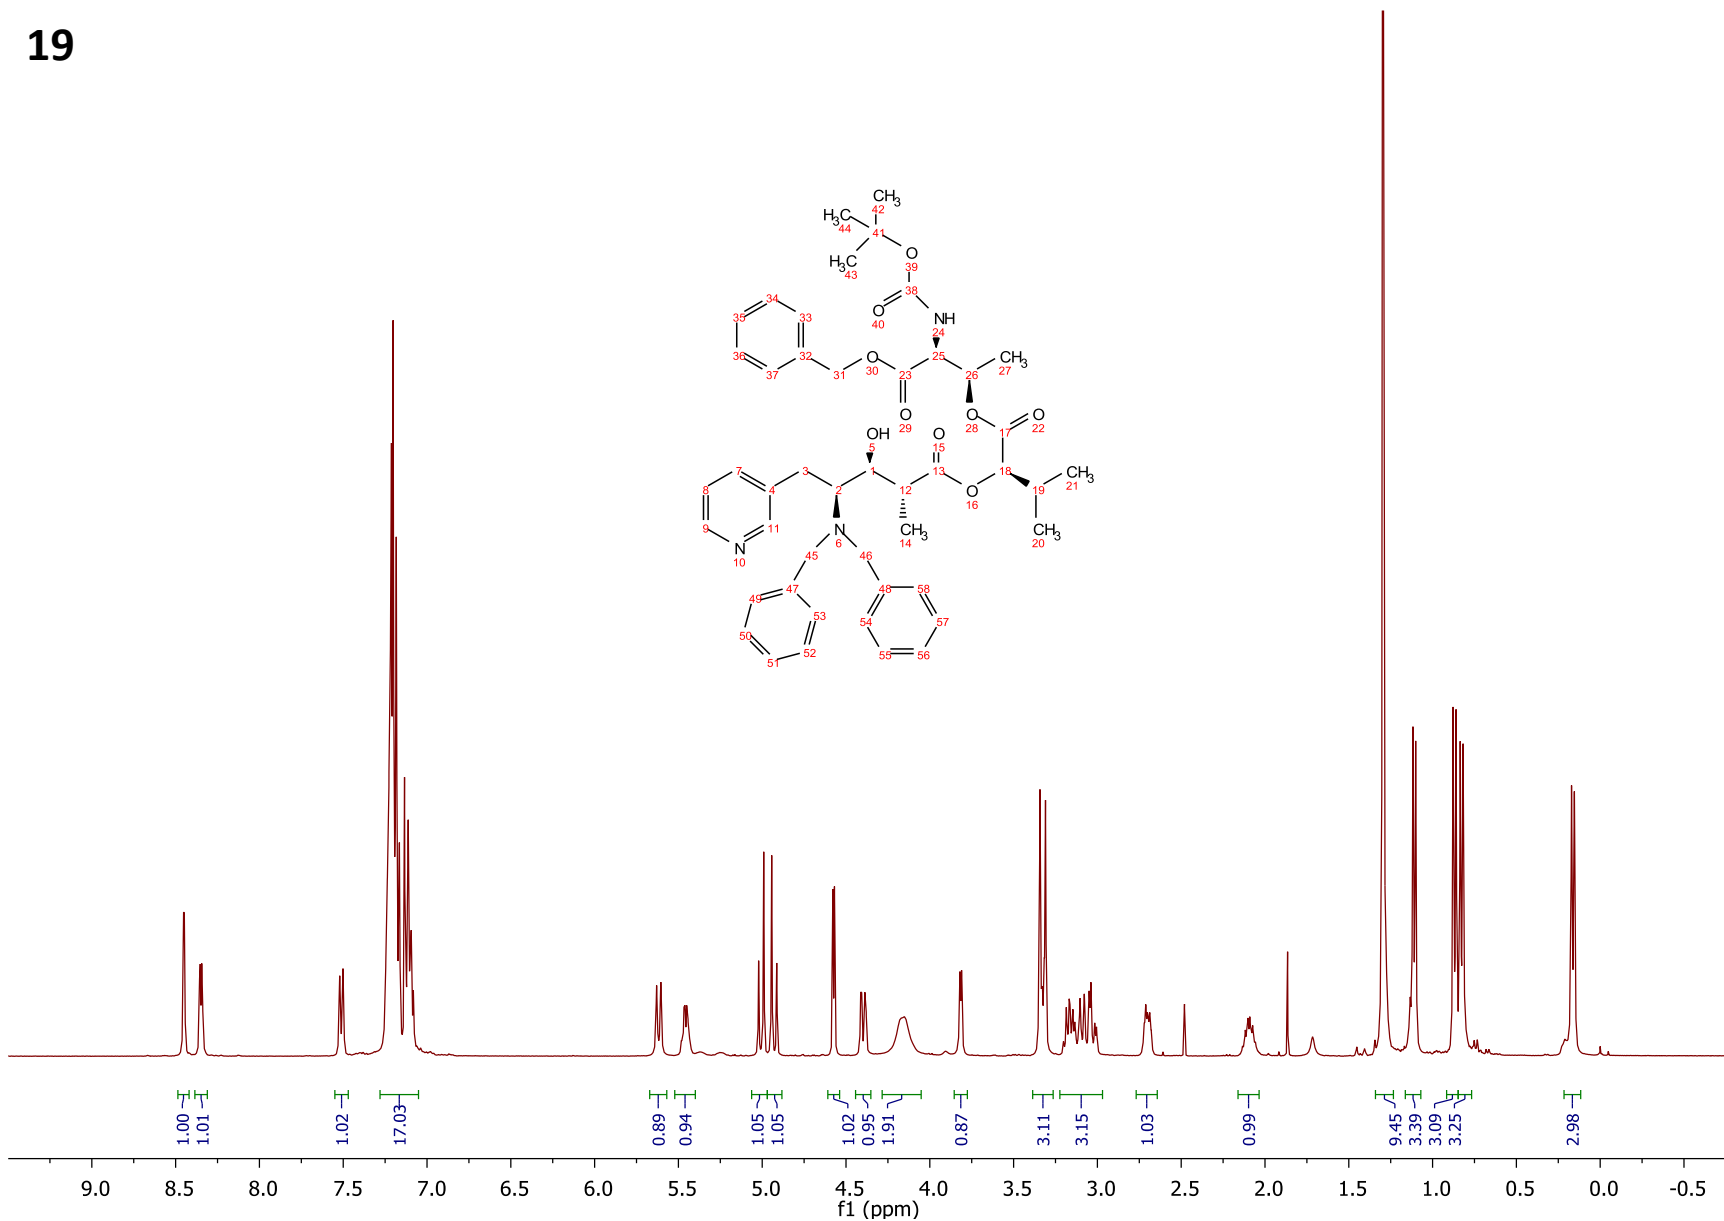

19

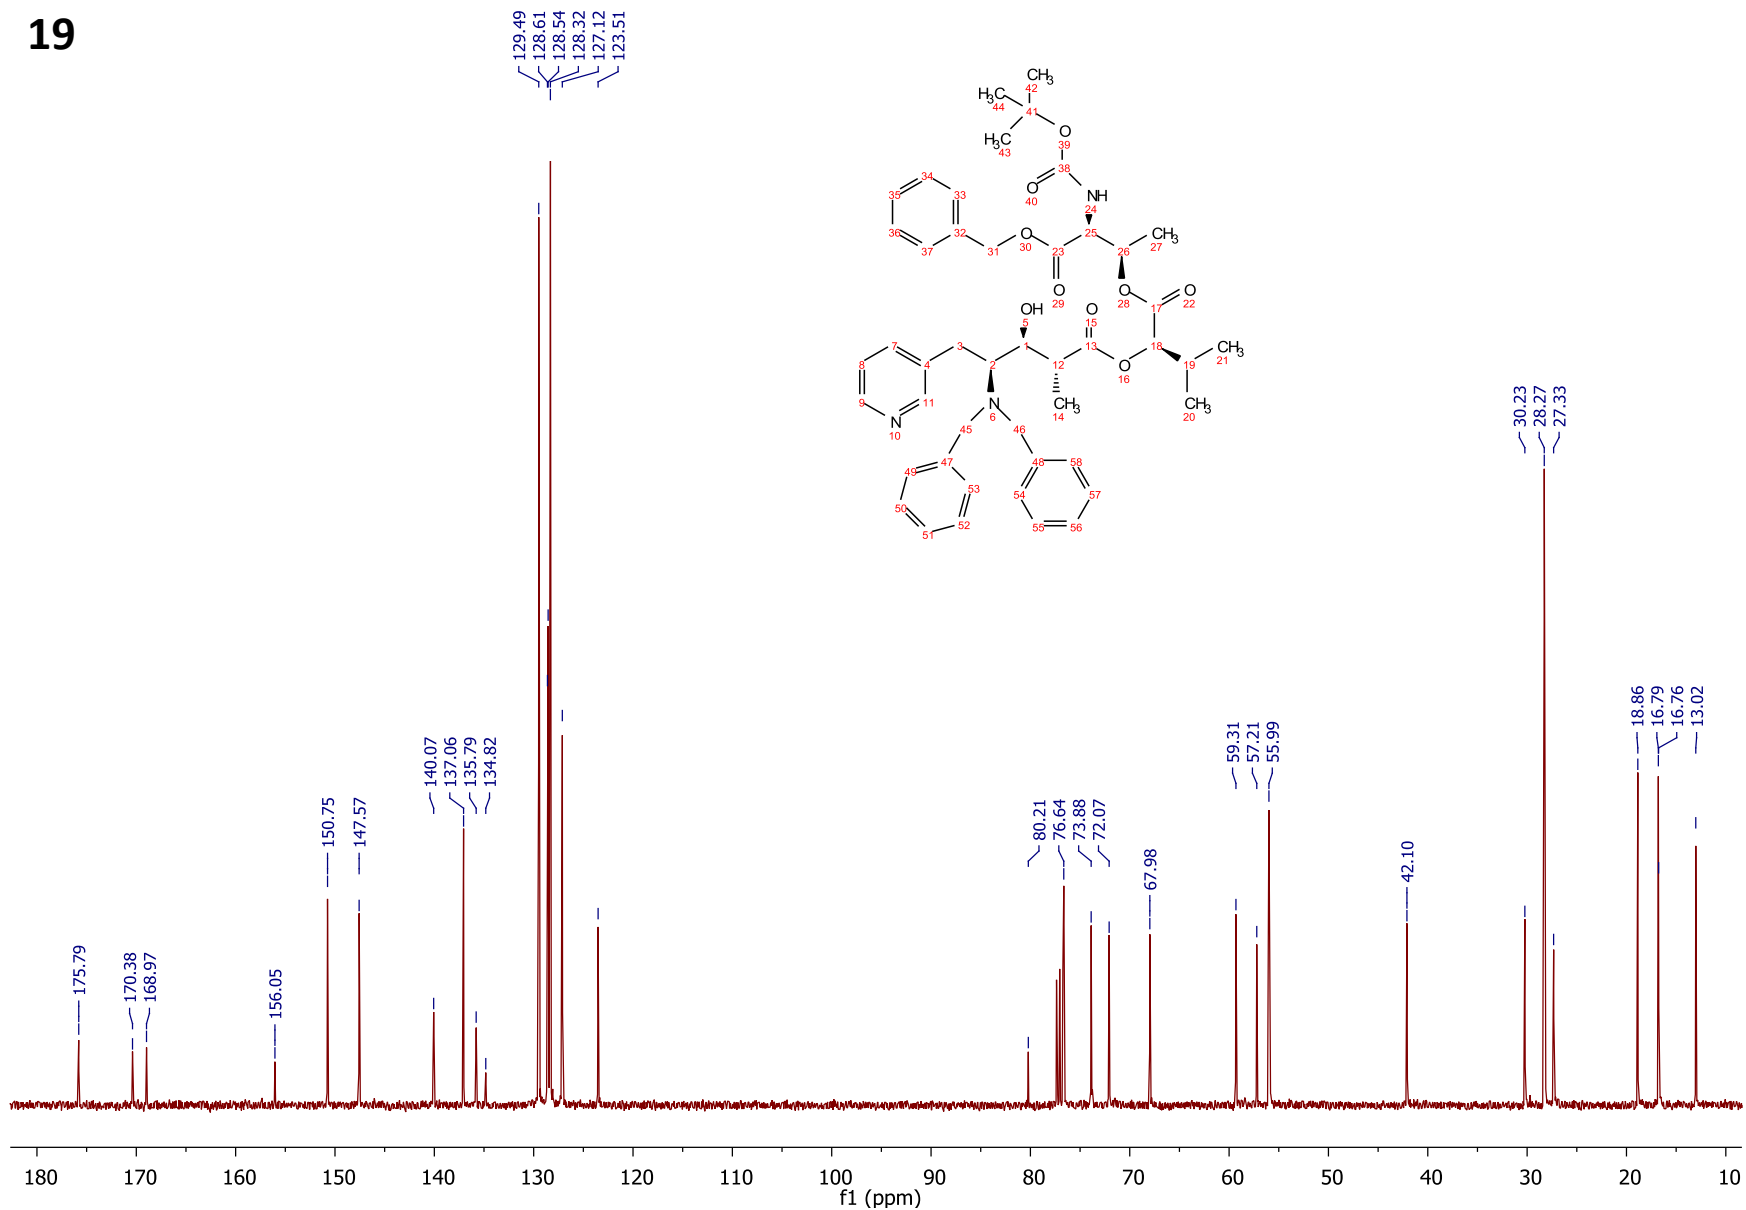

epi-4 (crude)

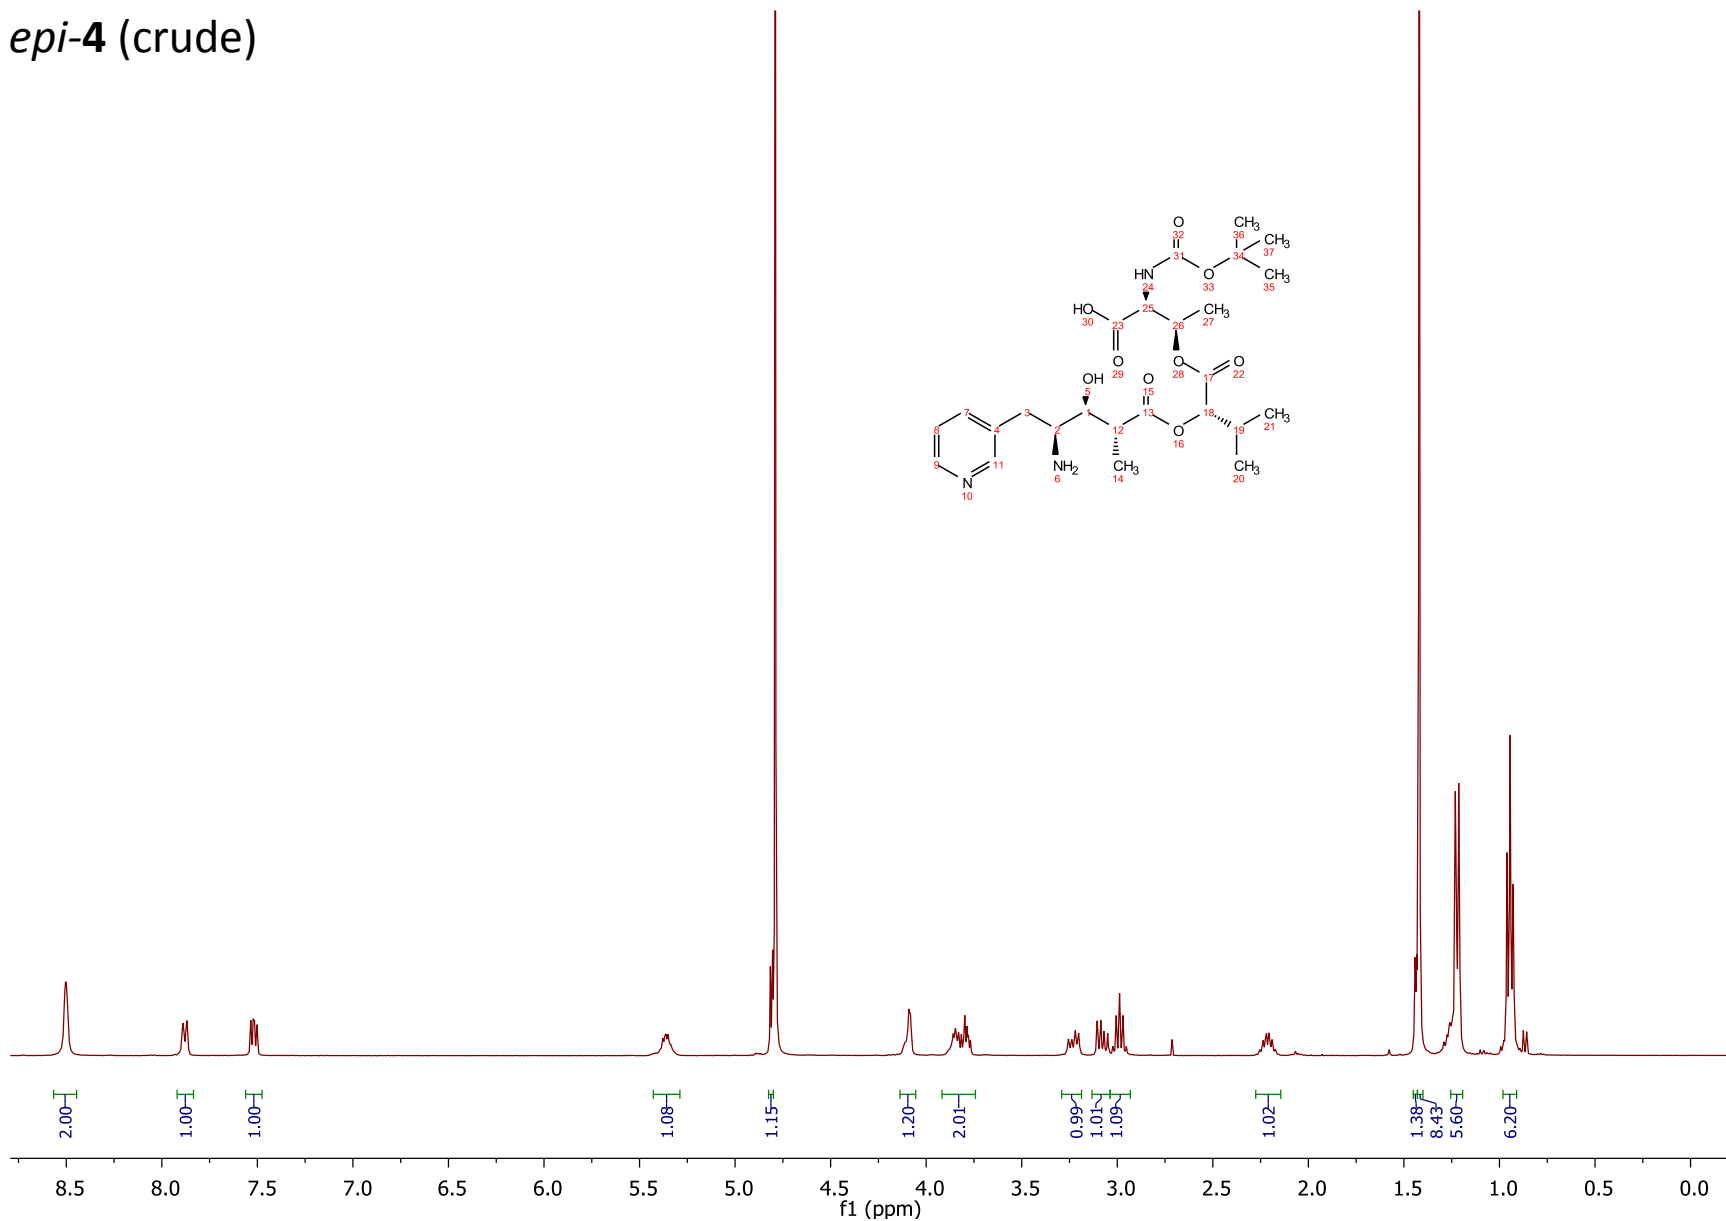

*epi-4* (crude)

3

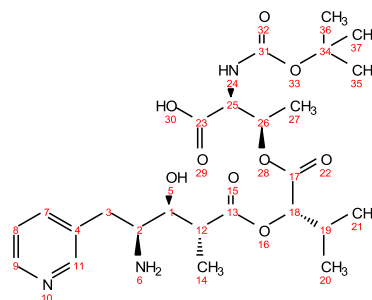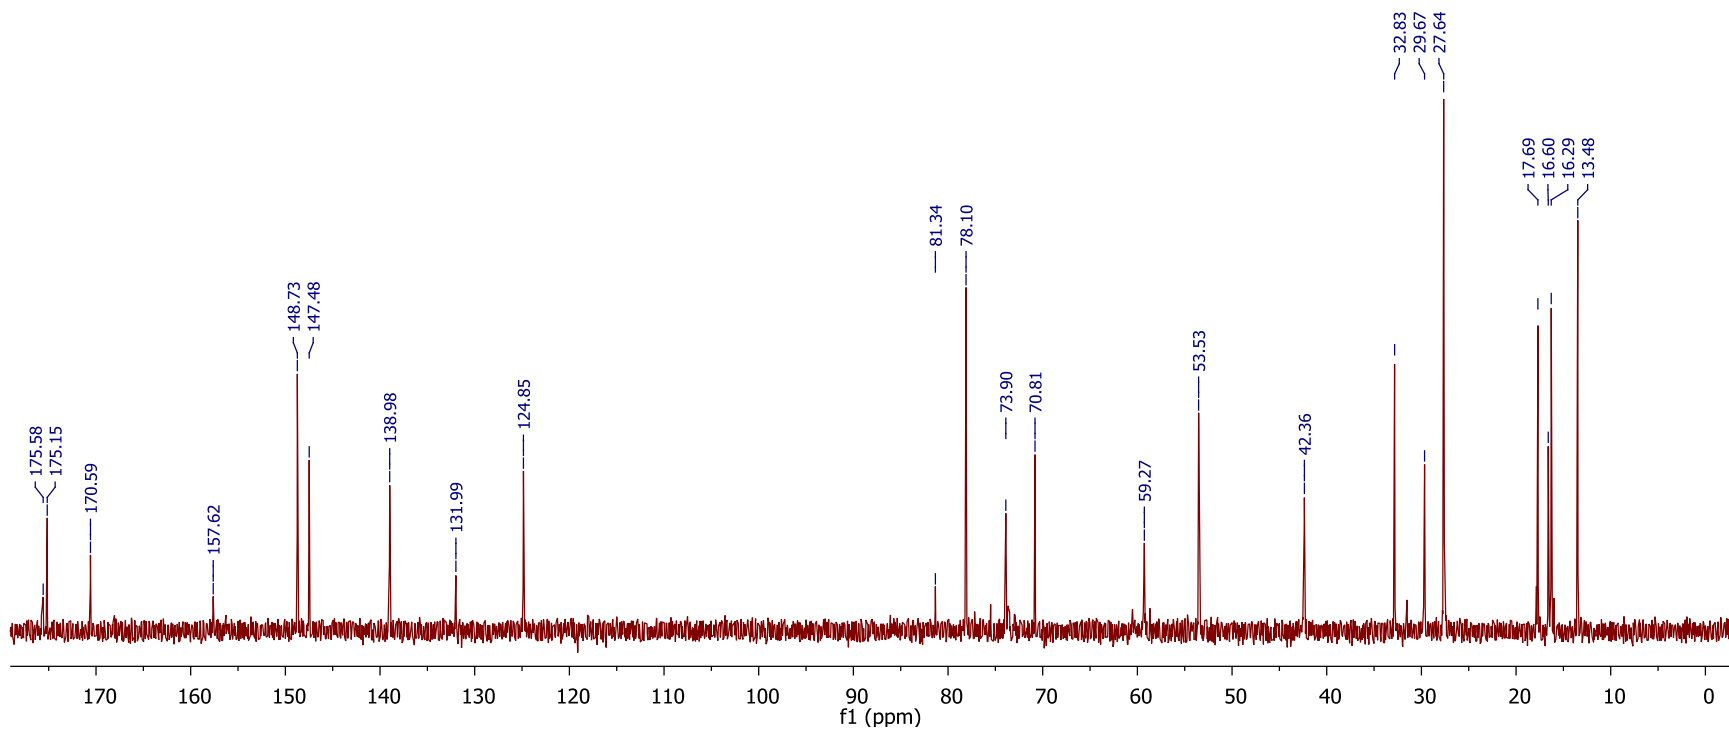



4 (crude)

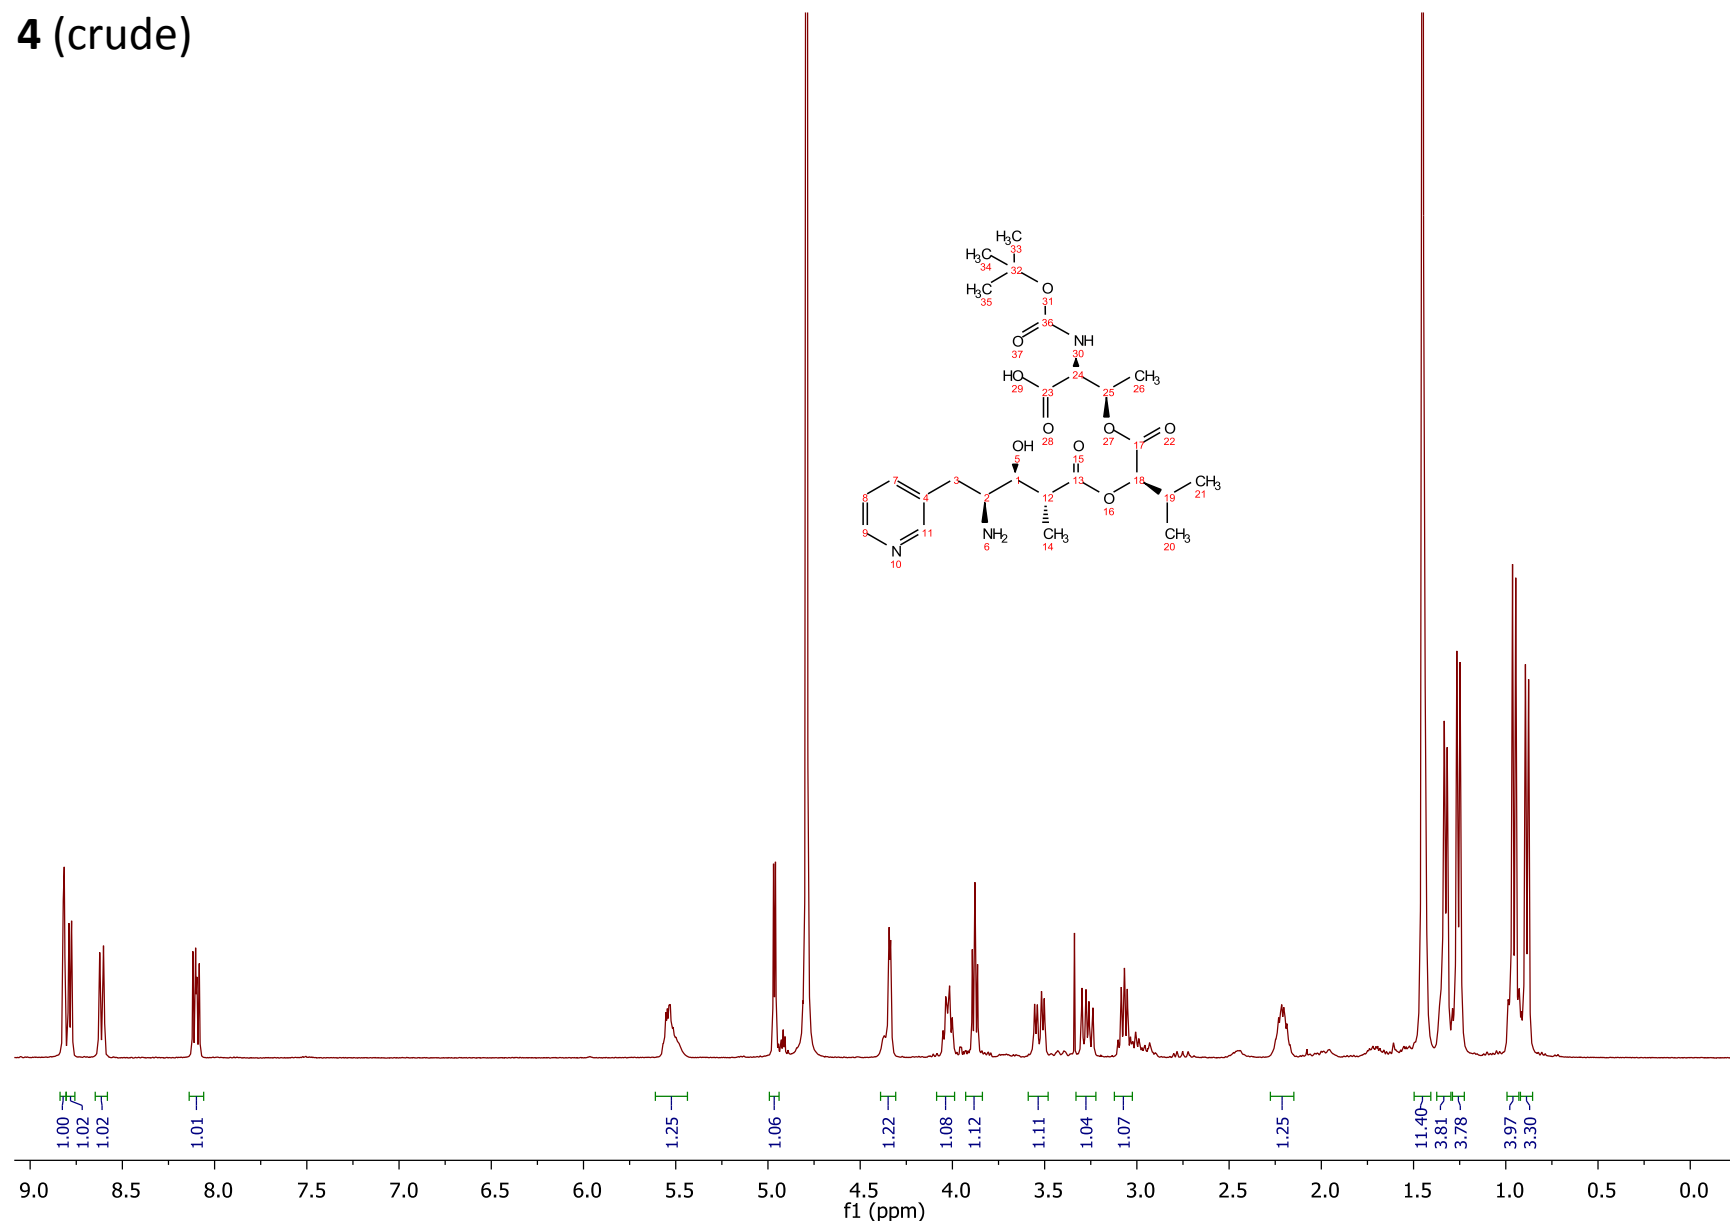

4 (crude)

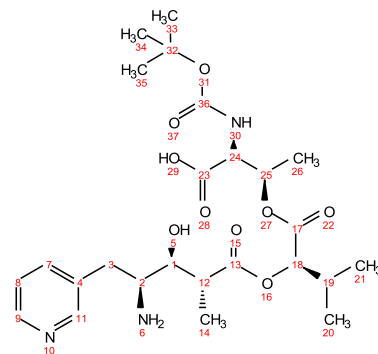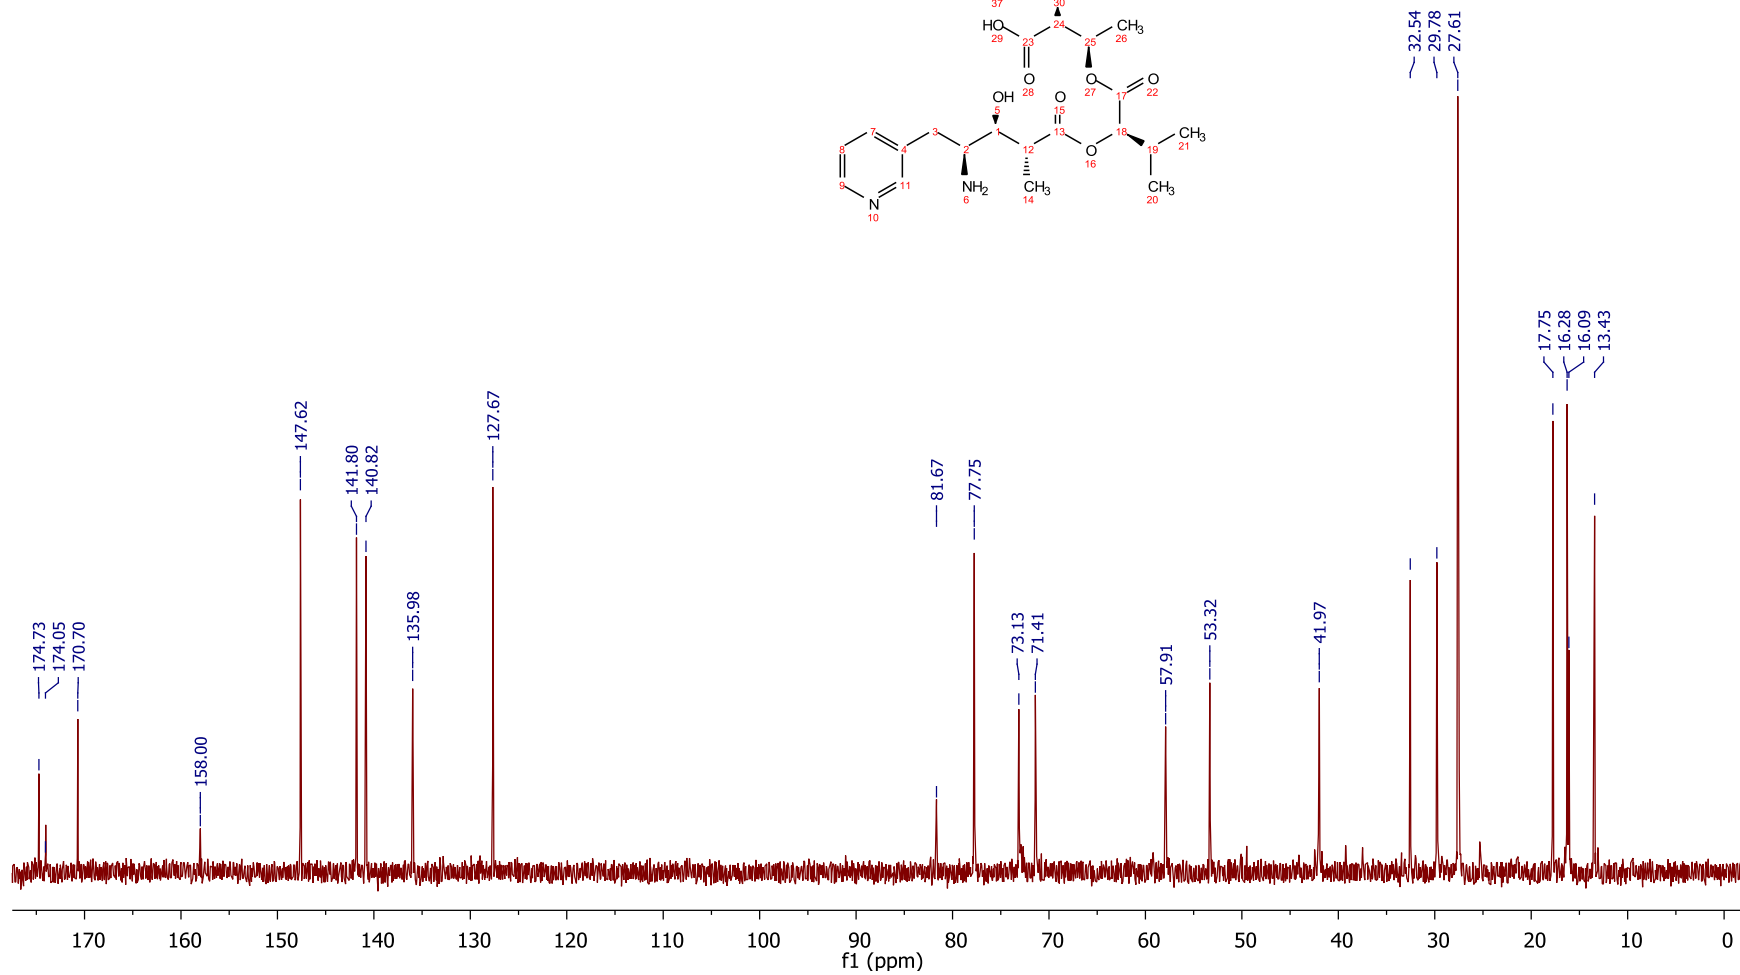

epi-20

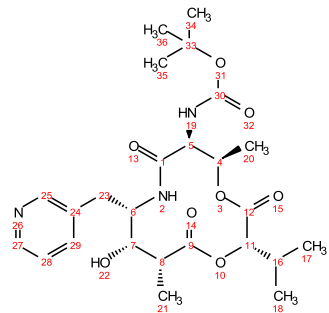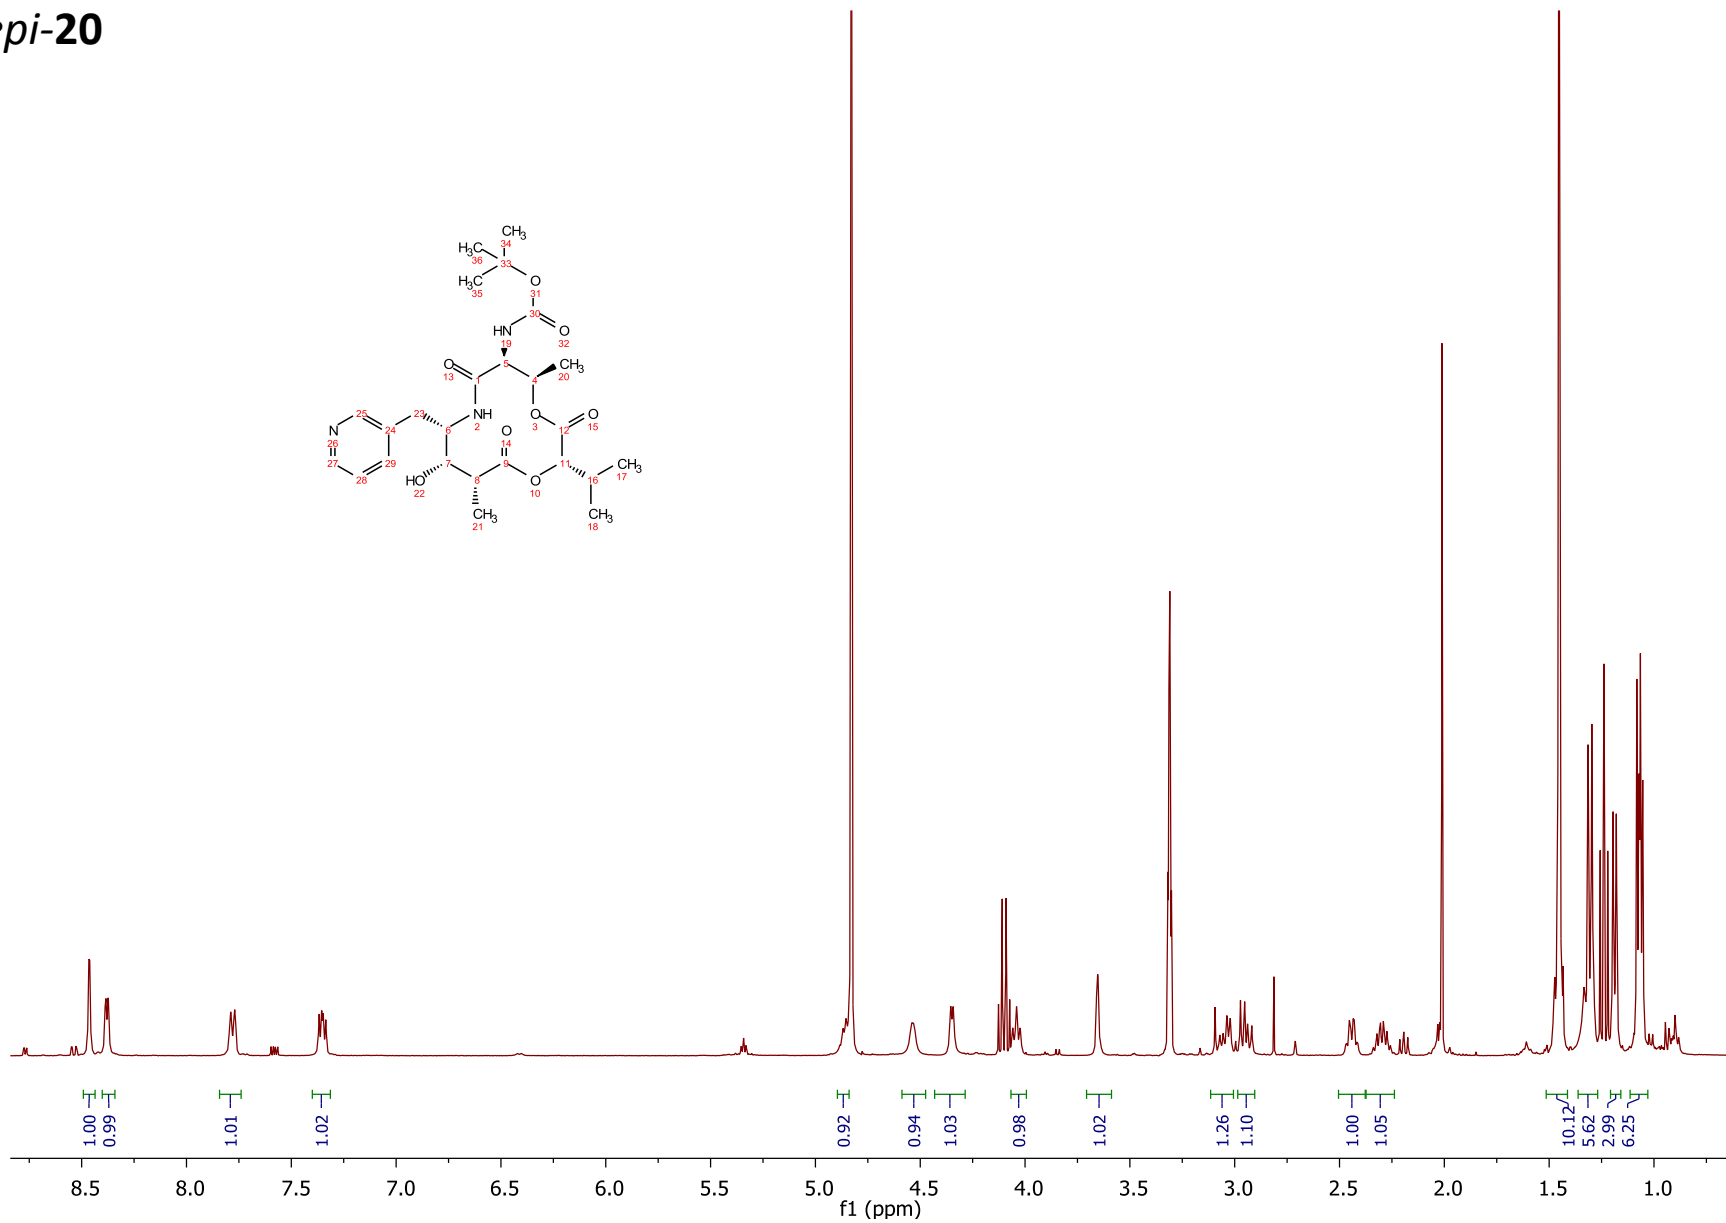

*epi-20*

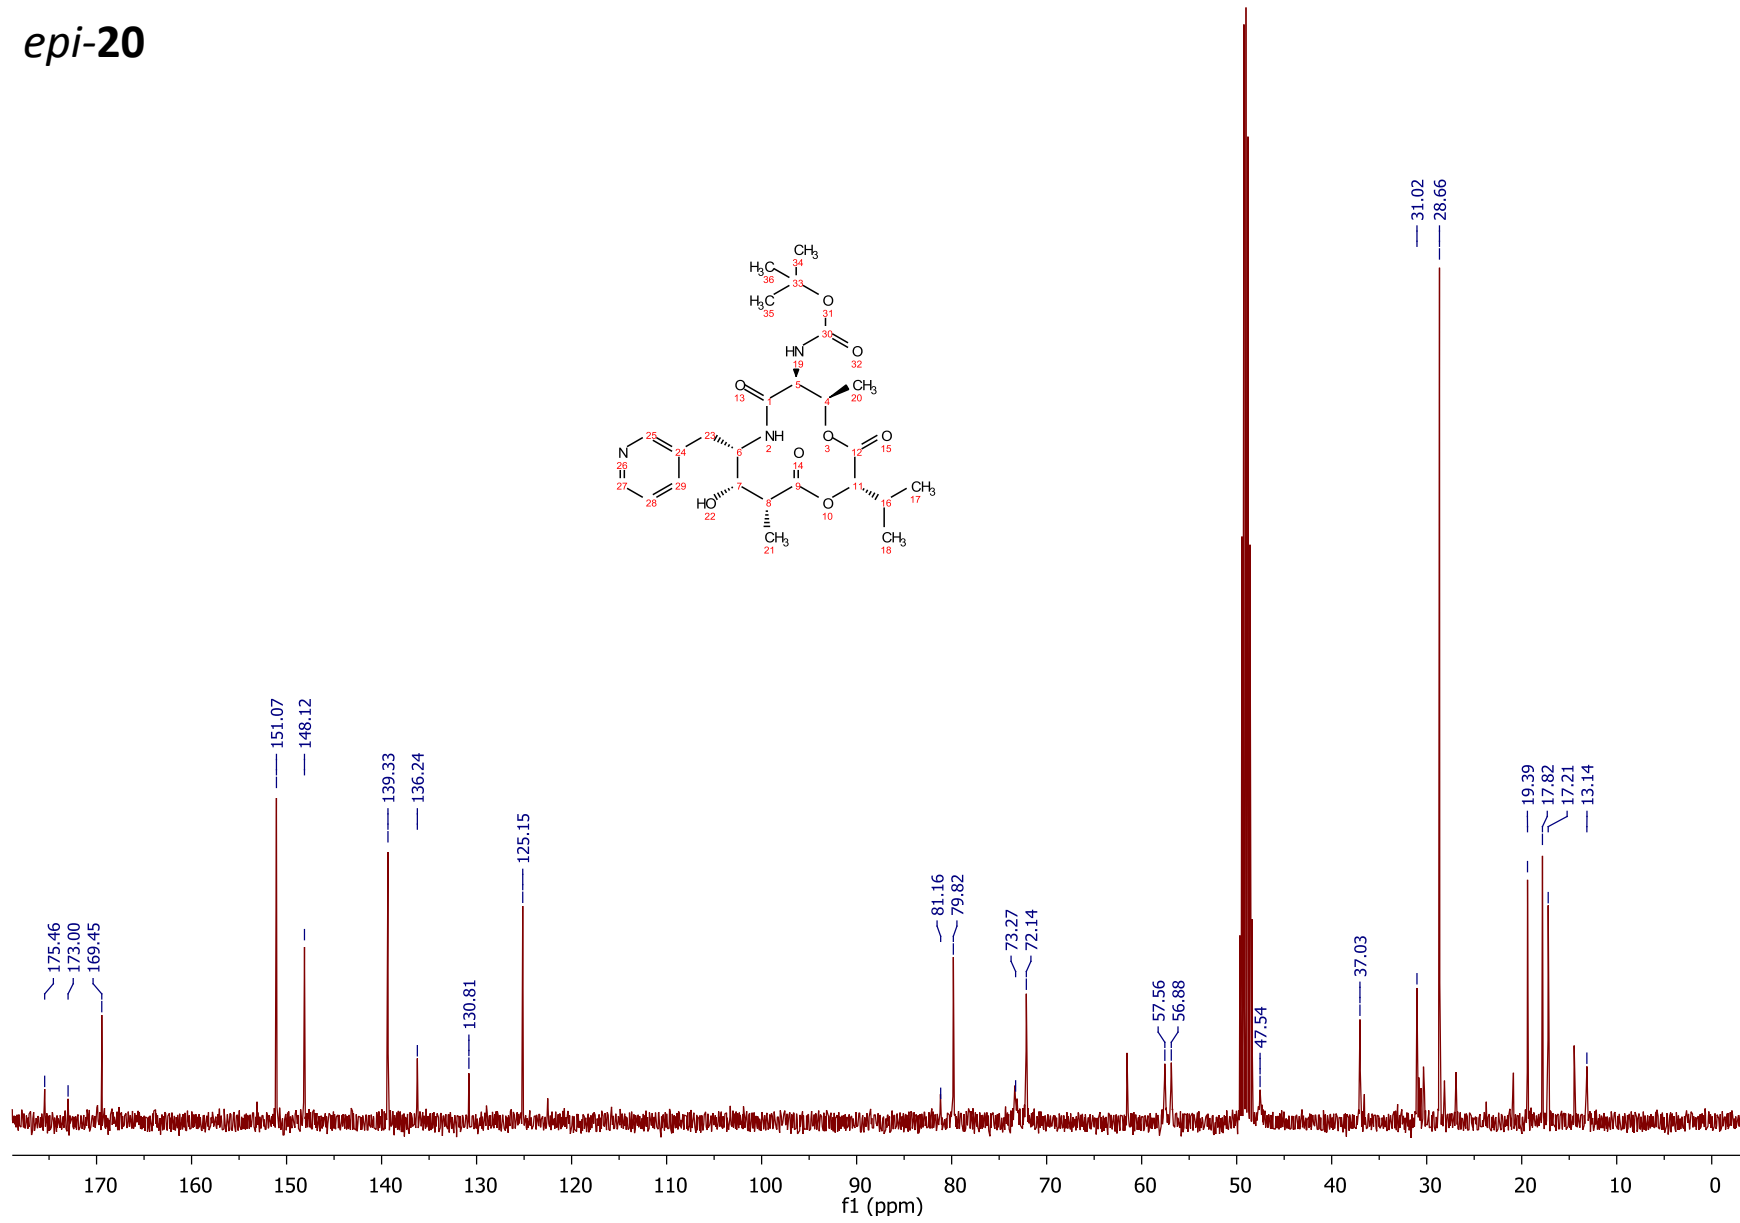

20

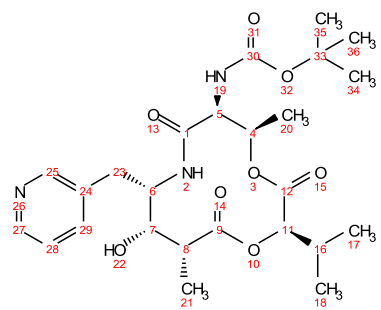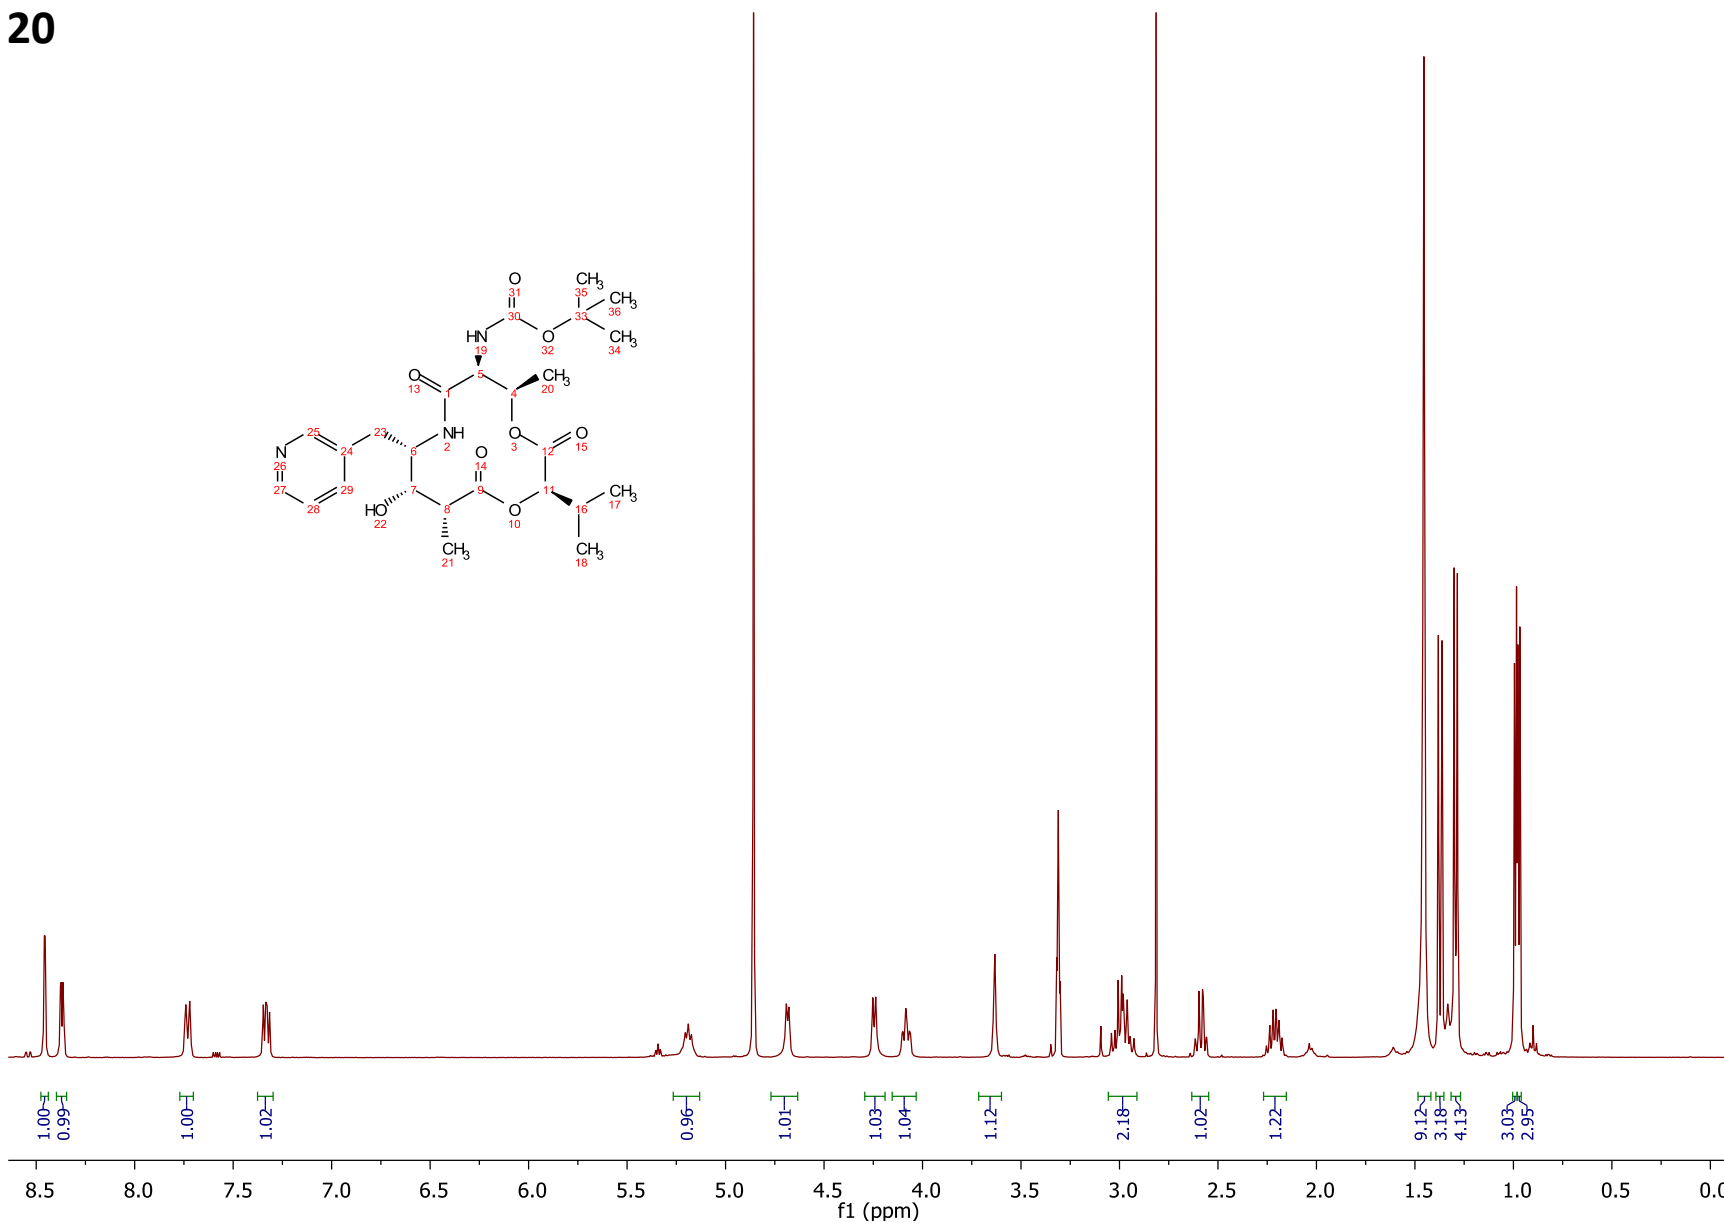

20

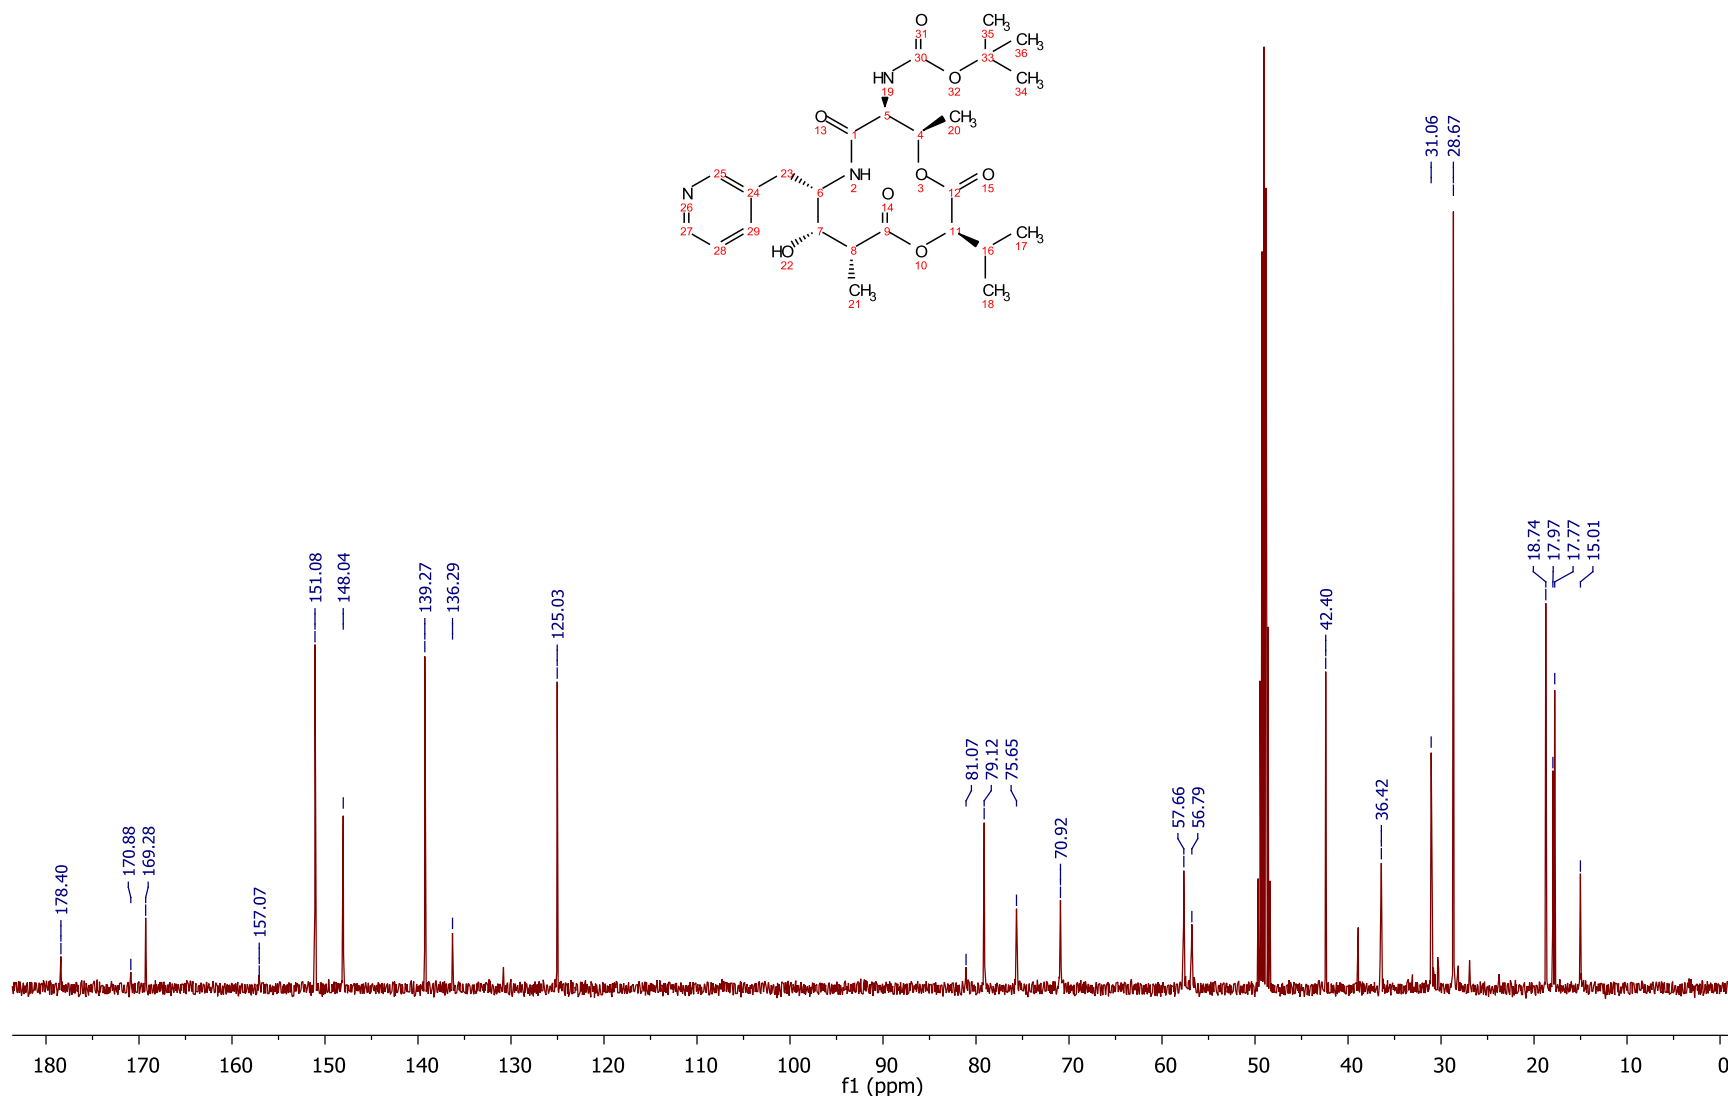

*epi-21* (crude)

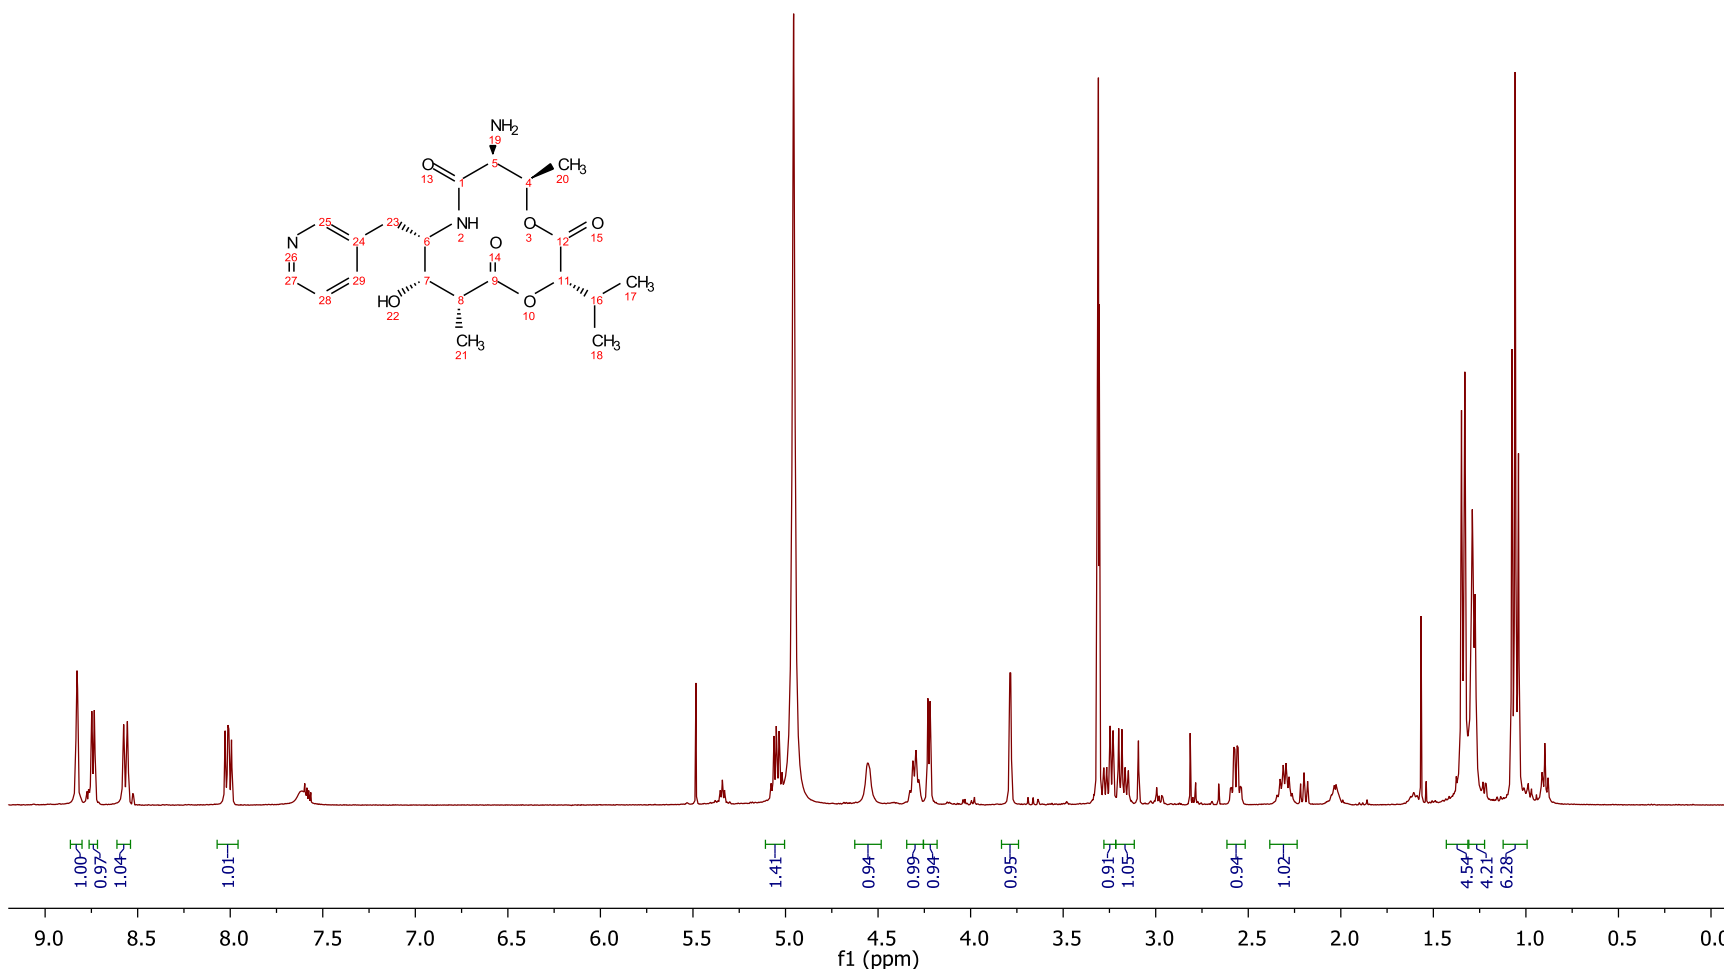

*epi*-21 (crude)

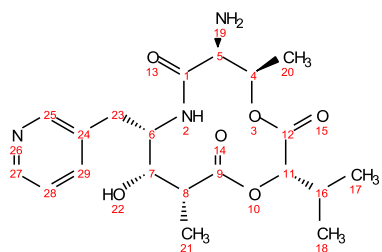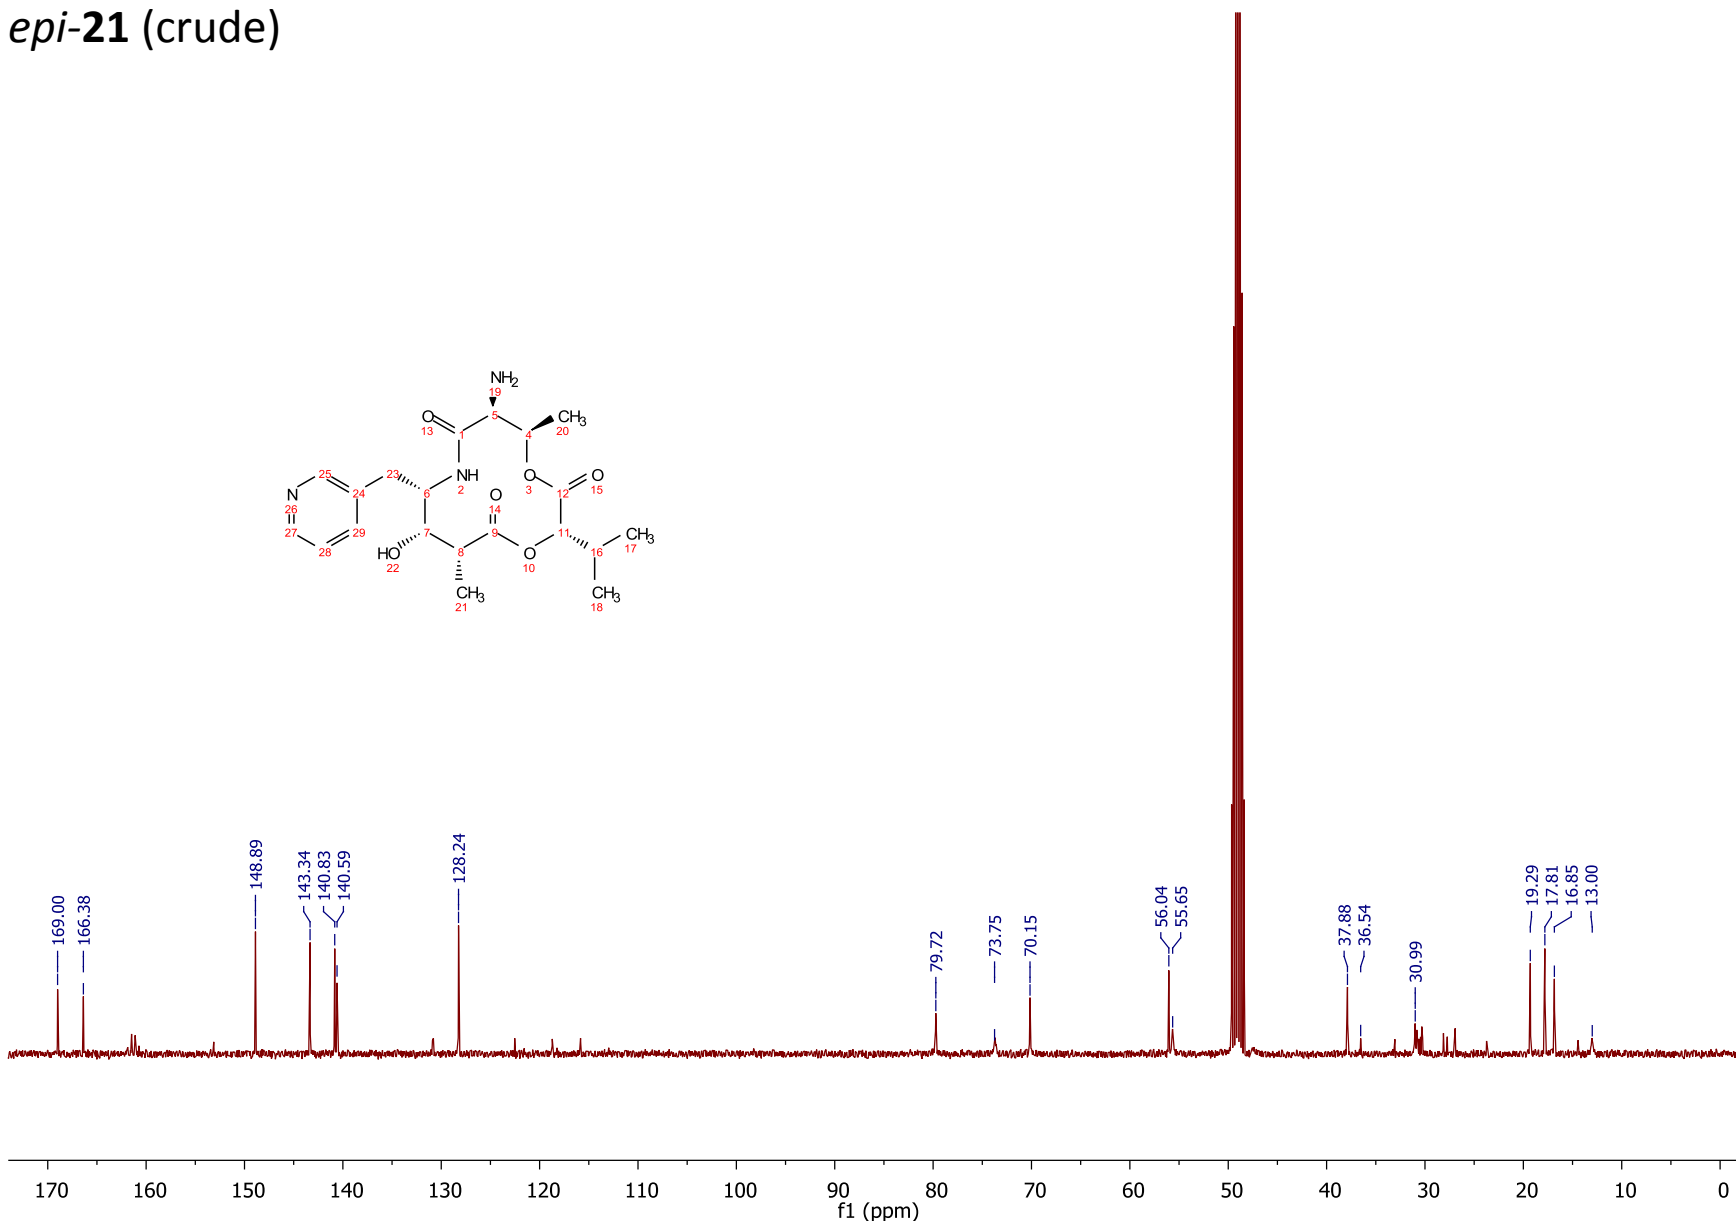



# 21 (crude)

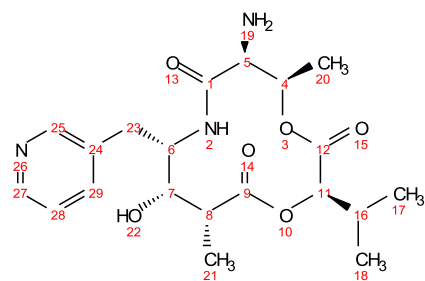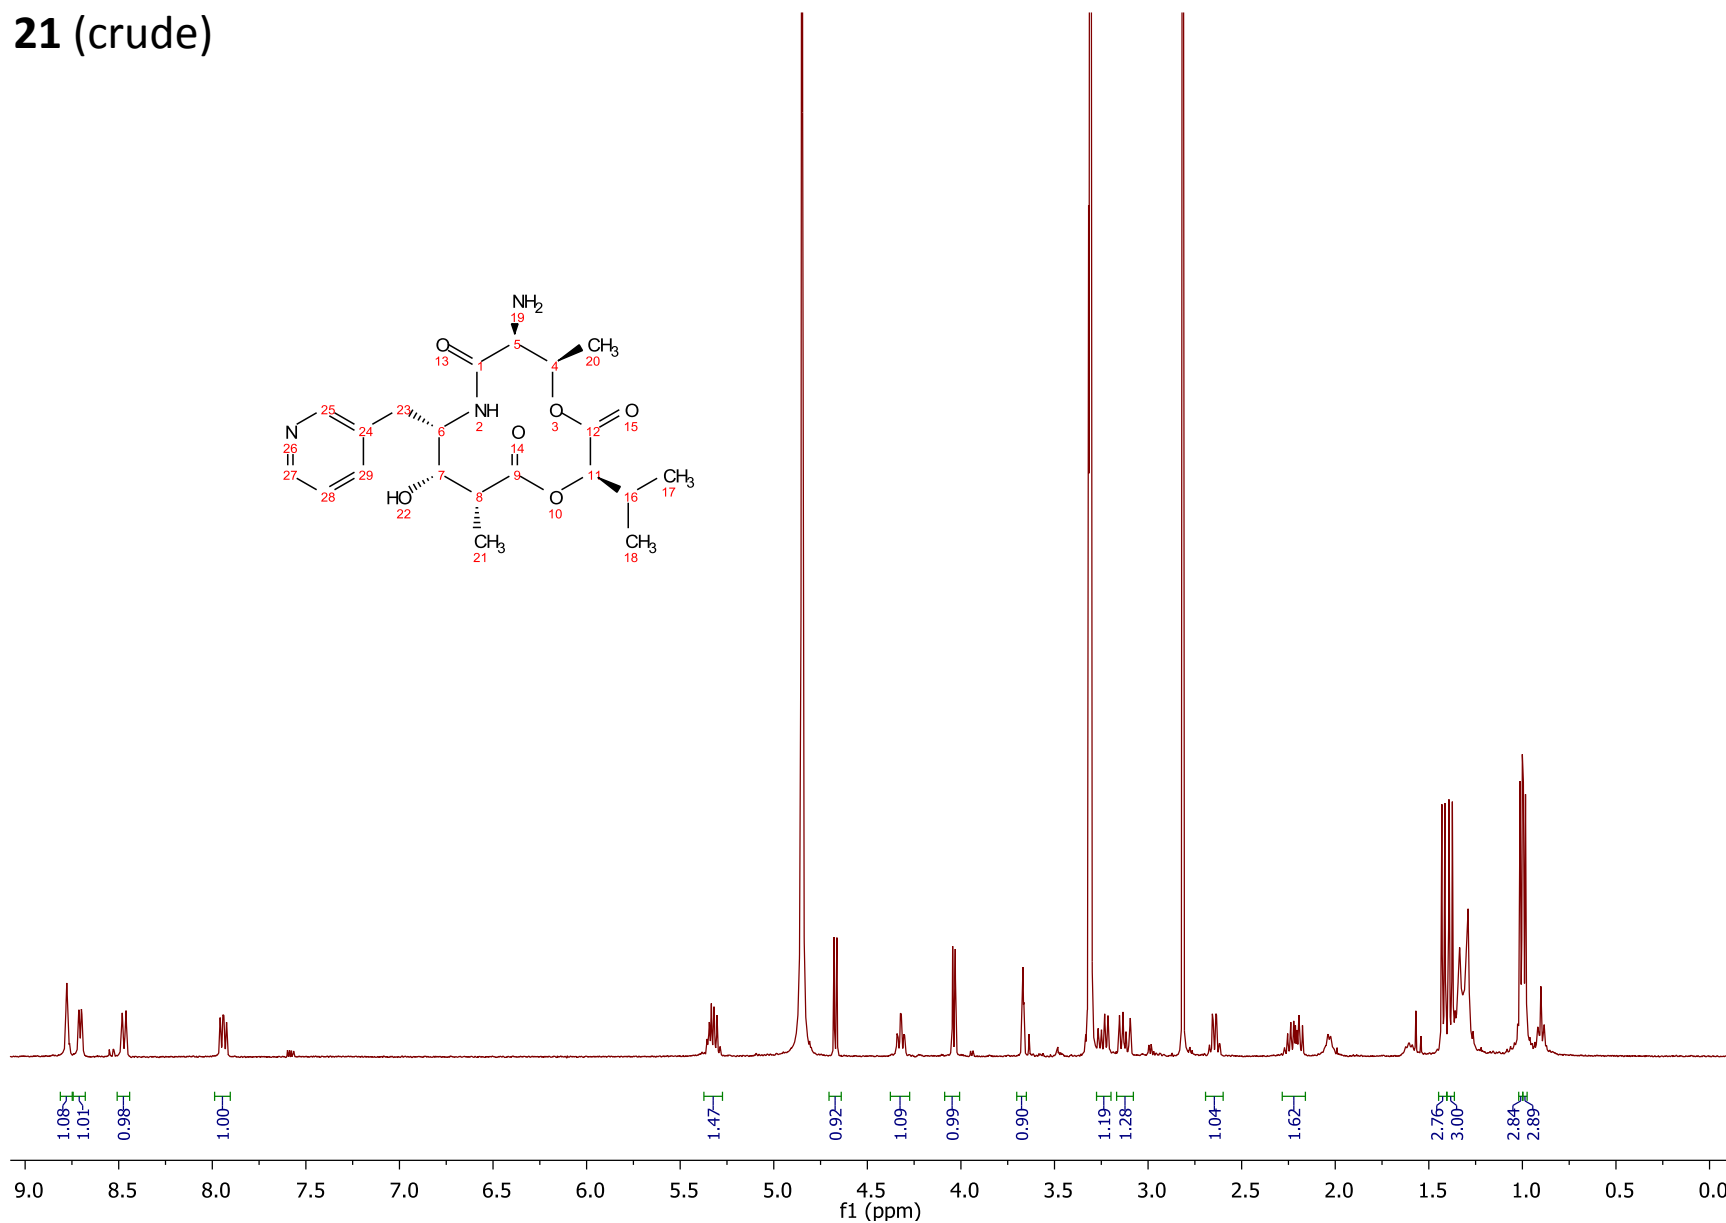

# 21 (crude)

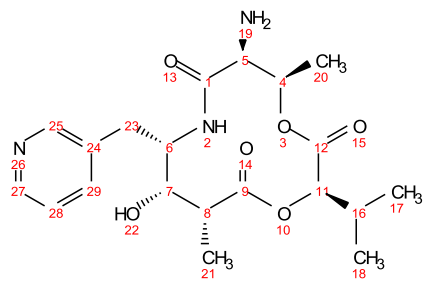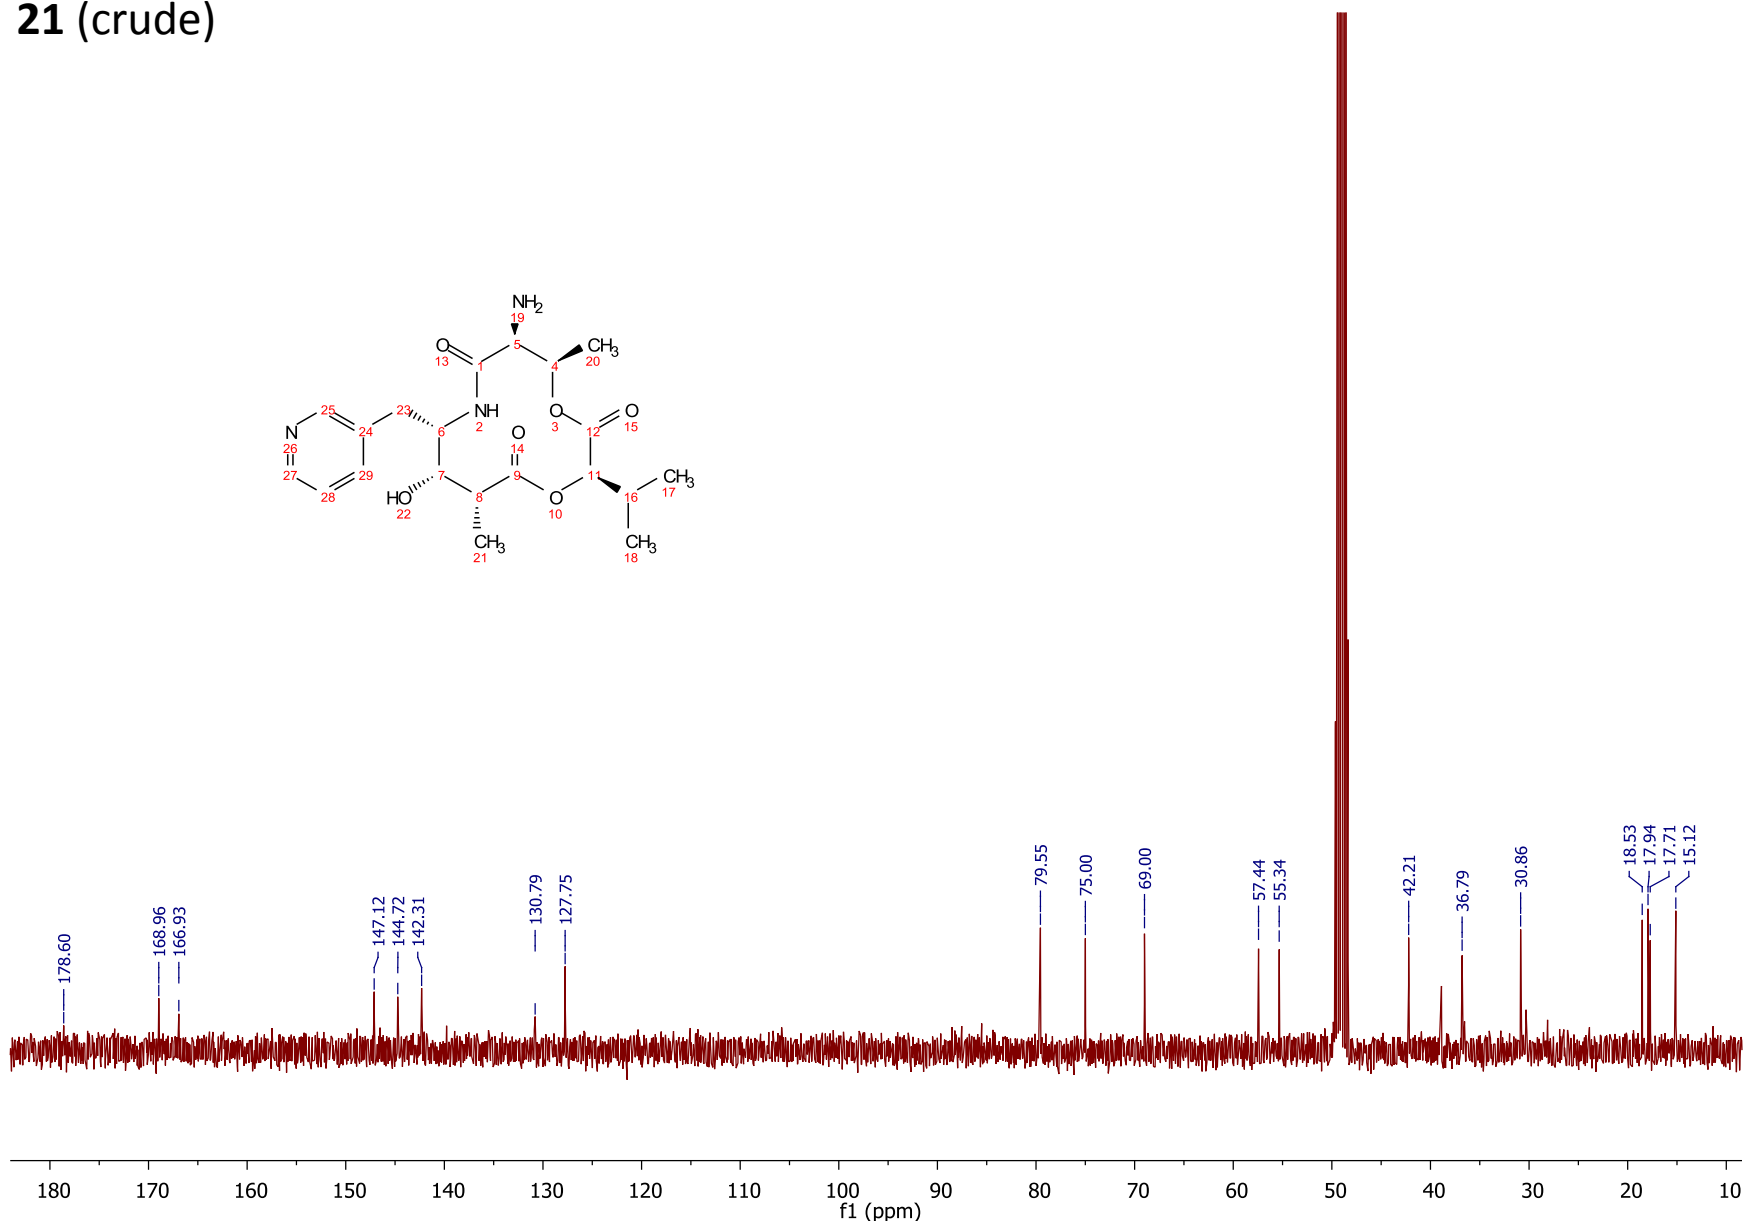

3

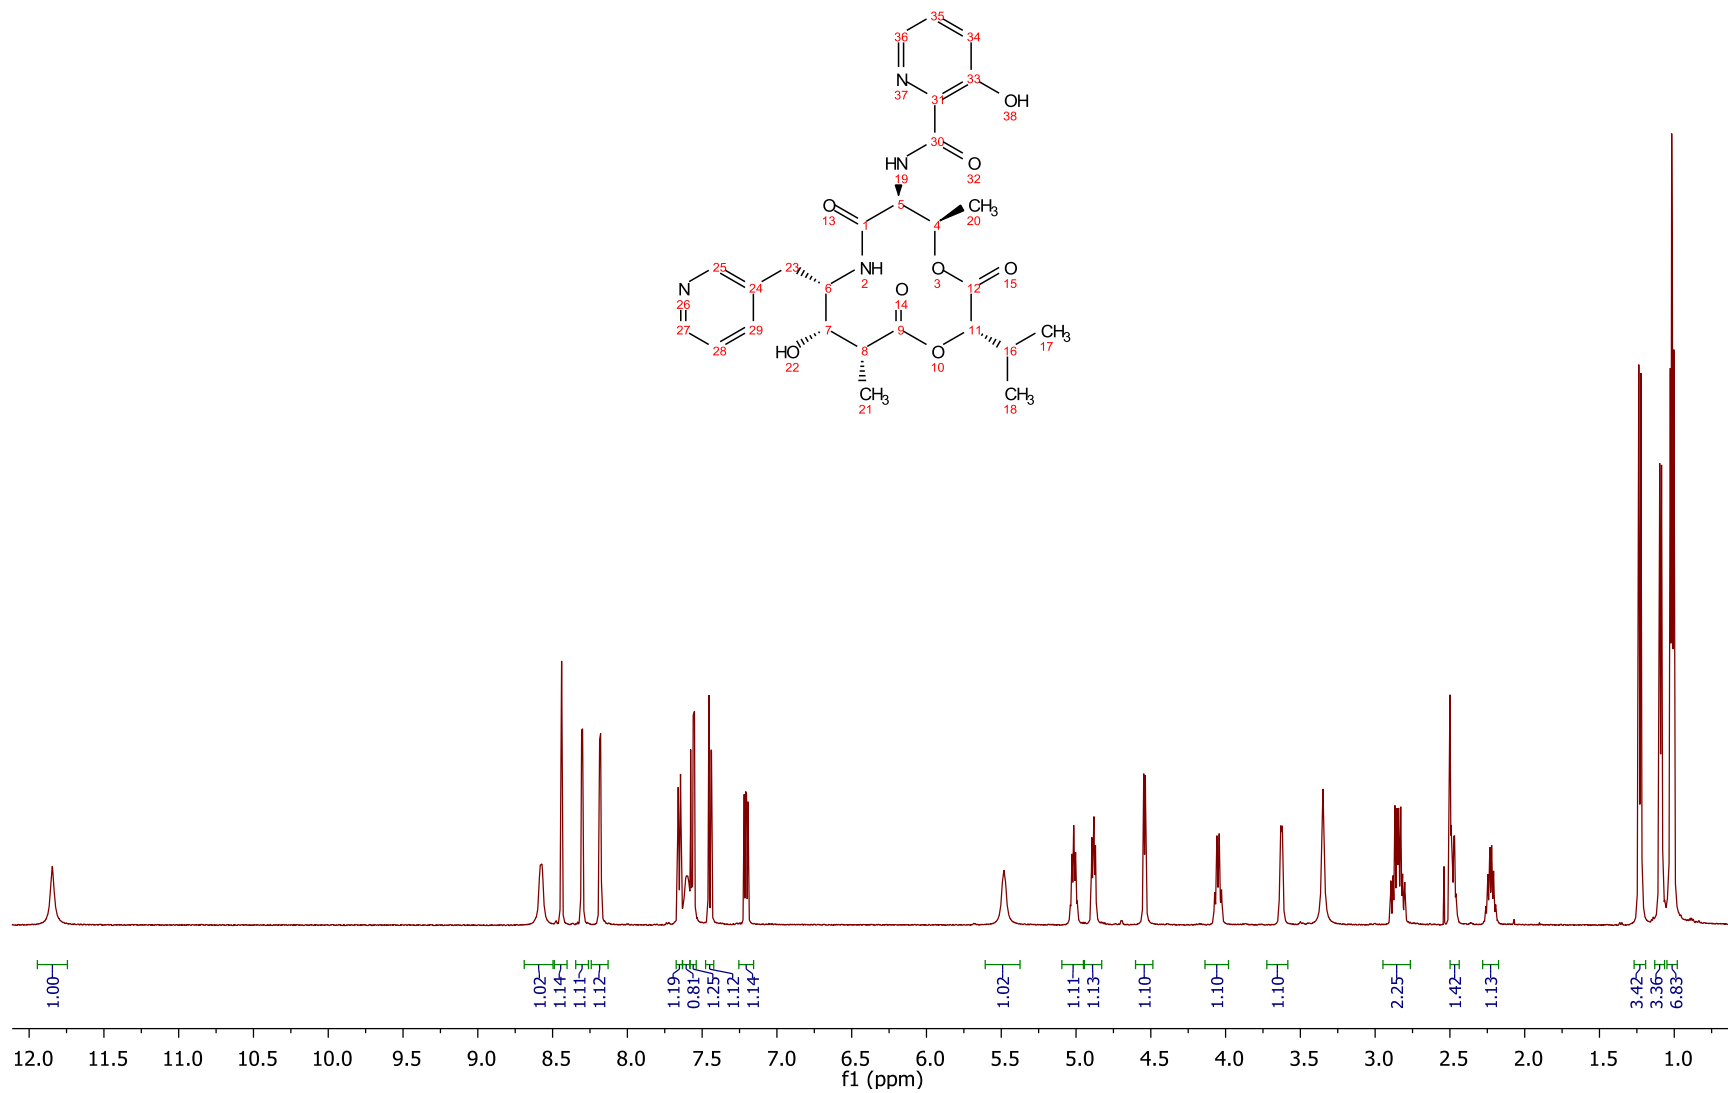

3

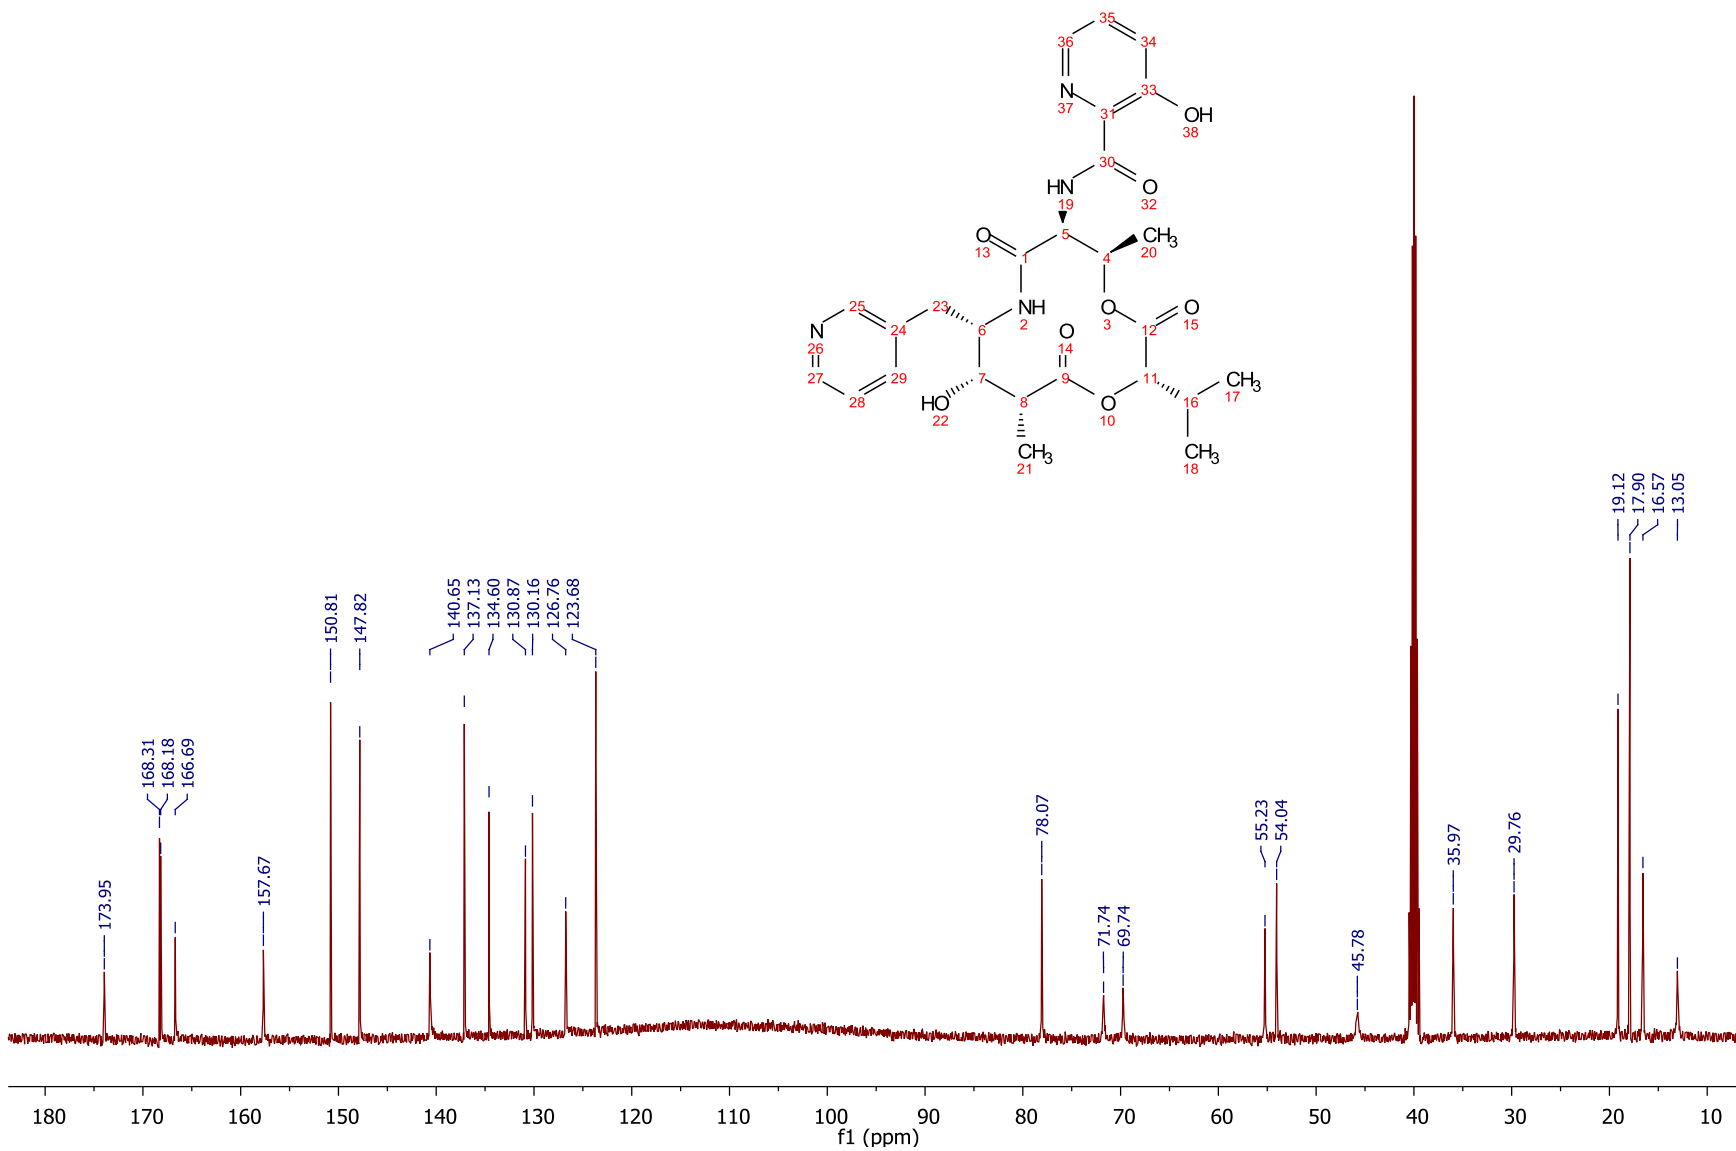

2

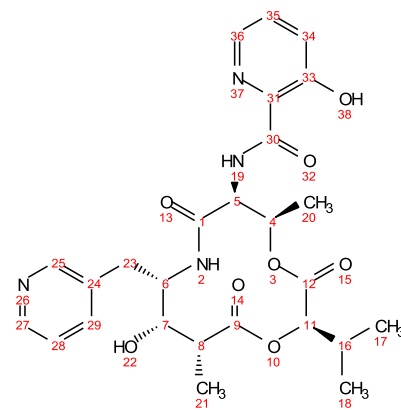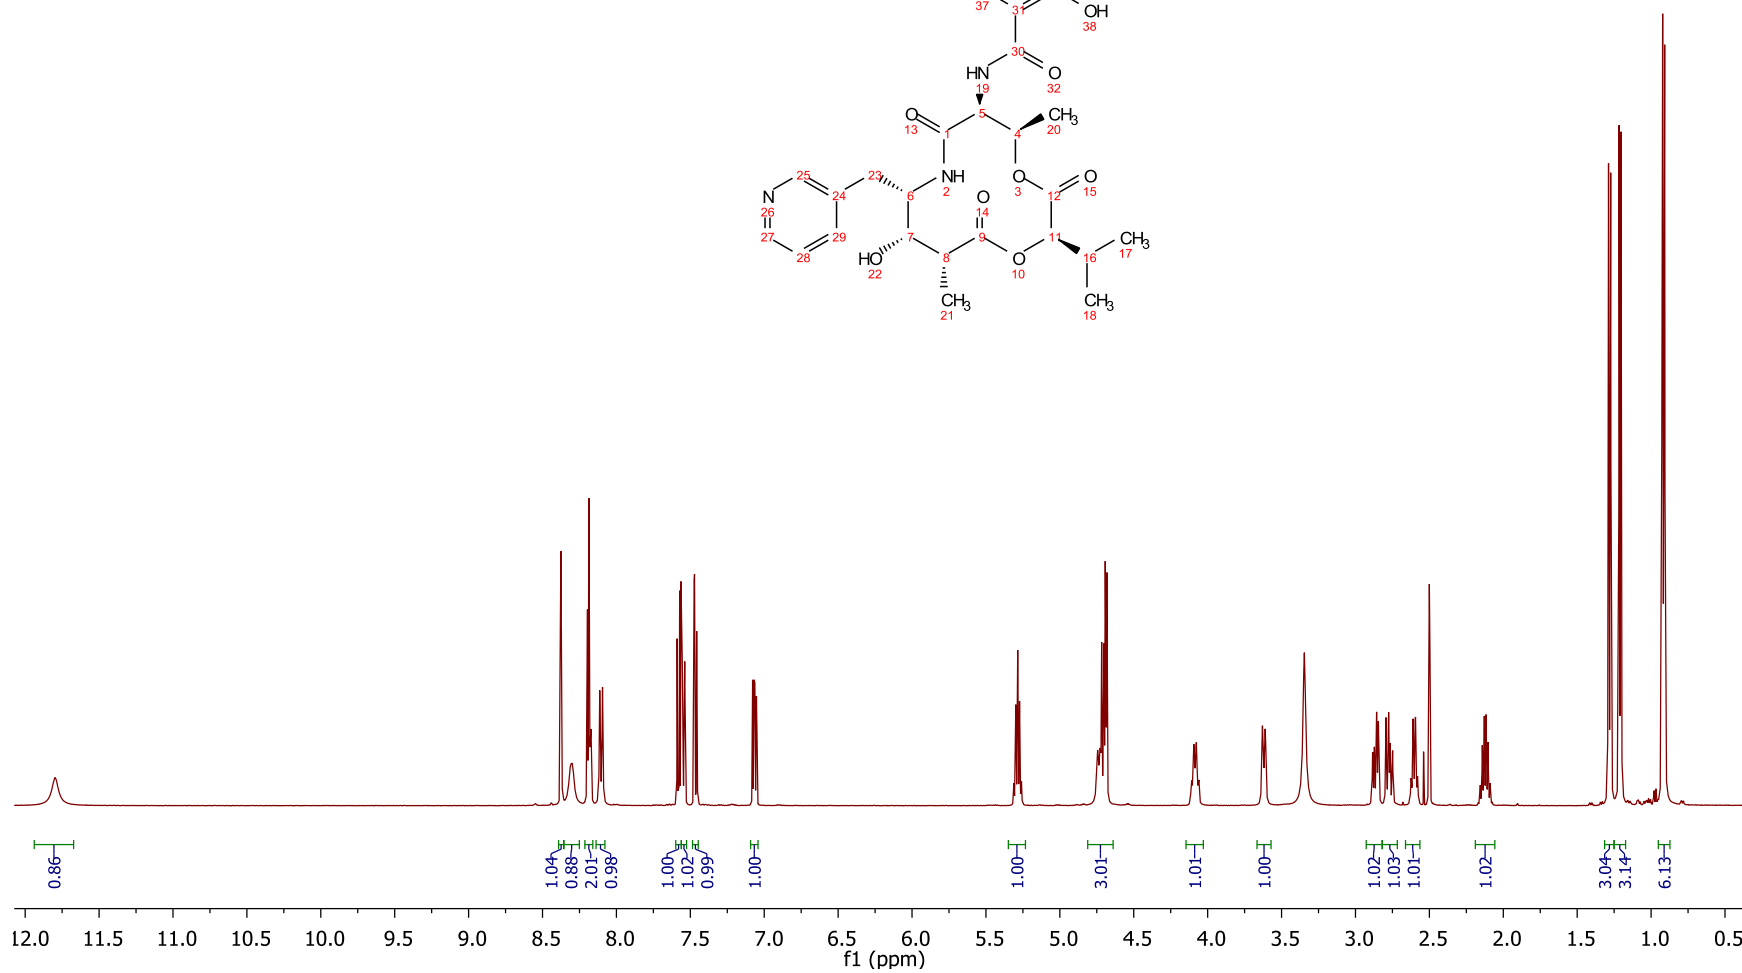

2

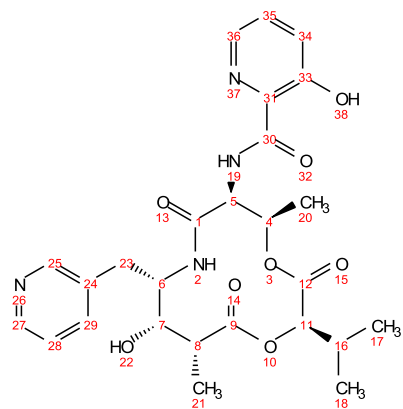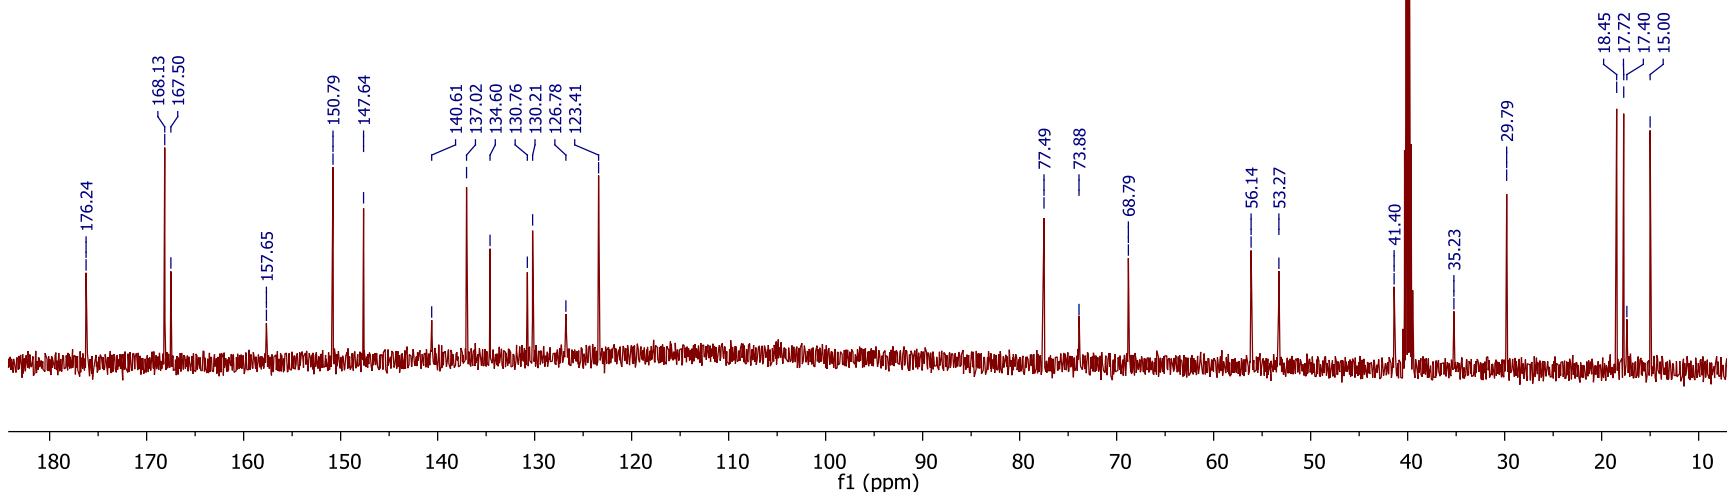

## 6. Biological Evaluation

### *Determination of the minimal inhibitory concentration (MIC) of 1, 2, and 3.*<sup>[1]</sup>

The drug susceptibility of *Mycobacterium tuberculosis* strain H37Rv was determined using the resazurin microtitre assay (REMA) (Palomino JC, Martin A, Camacho M, Guerra H, Swings J, Portaels F, Resazurin microtiter assay plate: simple and inexpensive method for detection of drug resistance in *Mycobacterium tuberculosis*, *Antimicrob Agents Chemother* **2002**, *46*, 2720-2722). Briefly, bacteria were diluted from frozen stocks to an OD<sub>600</sub> of 0.0001, and grown in a 96-well plate in the presence of serial compound dilutions. After 10 generations (7 days for *M. tuberculosis*) bacterial viability was determined using 10 µL of resazurin (0.025 % (w/v), and calculated as a percentage of resazurin turnover in the absence of compound. The MIC was determined as the minimal concentration of compound that caused background resazurin reduction

### *Steady state kinetics and inhibition of InhA.*<sup>[1]</sup>

Inhibition of InhA activity was investigated using InhA(S94A) at 60 nM. Kinetic parameters were determined by following NADH oxidation every min for 30 min at 340 nm using a TECAN FL200 spectrophotometer. All reactions were performed at 25°C in 30 mM PIPES (pH 6.5), 150 mM NaCl and 10% glycerol in a 384 well plate. After addition of variable concentrations of NADH, reactions were initiated by adding 2-trans-dodecenoyl-CoA to a final concentration of 40 µM (250 µM in one experiment). Steady state *K<sub>m</sub>* for NADH was determined by measuring enzyme kinetics at different NADH concentrations (0 – 800 µM). NADH *K<sub>m</sub>* and pyridomycin and analogs *K<sub>i</sub>*'s were determined by measuring enzyme kinetics with both different NADH concentrations (33, 40, 50, 66, 75, 100, 150 µM) and different pyridomycin and analog concentrations (0, 1.25, 2.5, 5, 10, 20, 30 and 40 µg/mL). Firstly the rate of NADH oxidation was determined by linear regression of the 340 nm absorbance values (enzyme velocity) using Graphpad Prism. Then the data was analysed to determine NADH *k<sub>m</sub>* and compound *K<sub>i</sub>* values (competitive inhibition model).

[1] R. C. Hartkoorn, C. Sala, J. Neres, F. Pojer, S. Magnet, R. Mukherjee, S. Uplekar, S. Boy-Rottger, K.-H. Altmann, S. T. Cole, *EMBO Mol. Med.* **2012**, *4*, 1032-1042.

## 7. Crystallographic Data for 17 (CCDC 905295)

The crystal structure of compound **17** is deposited at the Cambridge Crystallographic Data Centre with the CCDC reference number 905295.

Table 1. Crystal data and structure refinement for **17** (905295).

|                     |                                                               |
|---------------------|---------------------------------------------------------------|
| Identification code | 905295                                                        |
| Empirical formula   | C <sub>11</sub> H <sub>14</sub> N <sub>2</sub> O <sub>2</sub> |

|                                   |                                                                                                                 |
|-----------------------------------|-----------------------------------------------------------------------------------------------------------------|
| Formula weight                    | 206.24                                                                                                          |
| Temperature                       | 100(2) K                                                                                                        |
| Wavelength                        | 1.54178 Å                                                                                                       |
| Crystal system, space group       | Orthorhombic, P2(1)2(1)2(1)                                                                                     |
| Unit cell dimensions              | a = 4.7626(3) Å    alpha = 90 deg.<br>b = 8.9582(6) Å    beta = 90 deg.<br>c = 23.7884(19) Å    gamma = 90 deg. |
| Volume                            | 1014.92(12) Å <sup>3</sup>                                                                                      |
| Z, Calculated density             | 4, 1.350 Mg/m <sup>3</sup>                                                                                      |
| Absorption coefficient            | 0.769 mm <sup>-1</sup>                                                                                          |
| F(000)                            | 440                                                                                                             |
| Crystal size                      | 0.13 x 0.02 x 0.01 mm                                                                                           |
| Theta range for data collection   | 3.72 to 67.18 deg.                                                                                              |
| Limiting indices                  | -3 <= h <= 5, -9 <= k <= 10, -26 <= l <= 27                                                                     |
| Reflections collected / unique    | 5482 / 1686 [R(int) = 0.0858]                                                                                   |
| Completeness to theta             | = 67.18    93.5 %                                                                                               |
| Absorption correction             | None                                                                                                            |
| Max. and min. transmission        | 0.9939 and 0.9086                                                                                               |
| Refinement method                 | Full-matrix least-squares on F <sup>2</sup>                                                                     |
| Data / restraints / parameters    | 1686 / 0 / 192                                                                                                  |
| Goodness-of-fit on F <sup>2</sup> | 0.873                                                                                                           |
| Final R indices [I > 2sigma(I)]   | R1 = 0.0574, wR2 = 0.1438                                                                                       |
| R indices (all data)              | R1 = 0.0850, wR2 = 0.1640                                                                                       |
| Absolute structure parameter      | -0.2(6)                                                                                                         |
| Largest diff. peak and hole       | 0.235 and -0.289 e.Å <sup>-3</sup>                                                                              |

Table 2. Atomic coordinates ( $\times 10^4$ ) and equivalent isotropic displacement parameters ( $\text{Å}^2 \times 10^3$ ) for 905295.

U(eq) is defined as one third of the trace of the orthogonalized Uij tensor.

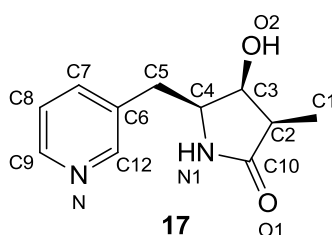

|      | x         | y        | z        | U(eq) |
|------|-----------|----------|----------|-------|
| O(1) | -5307(6)  | -4179(3) | -2578(1) | 39(1) |
| O(2) | -6768(5)  | -3236(3) | -1022(1) | 38(1) |
| N(1) | -7490(7)  | -2169(4) | -2172(1) | 32(1) |
| C(1) | -7597(11) | -5964(5) | -1654(2) | 42(1) |
| C(2) | -8835(9)  | -4477(5) | -1828(2) | 32(1) |
| C(3) | -9203(9)  | -3324(5) | -1367(2) | 34(1) |



|       |           |          |          |       |
|-------|-----------|----------|----------|-------|
| C(4)  | -9456(9)  | -1872(5) | -1702(2) | 32(1) |
| C(5)  | -8598(9)  | -453(5)  | -1395(2) | 36(1) |
| C(6)  | -10607(9) | 16(4)    | -937(2)  | 32(1) |
| C(7)  | -12521(9) | 1173(4)  | -1020(2) | 35(1) |
| C(8)  | -14268(9) | 1614(5)  | -581(2)  | 38(1) |
| C(9)  | -14117(9) | 877(5)   | -80(2)   | 36(1) |
| C(10) | -7006(8)  | -3628(4) | -2242(2) | 33(1) |
| N     | -12308(8) | -257(4)  | 15(1)    | 40(1) |
| C(12) | -10597(9) | -646(5)  | -413(2)  | 37(1) |

---

Table 3. Bond lengths [Å] and angles [deg] for 905295.

---

|                 |          |
|-----------------|----------|
| O(1)-C(10)      | 1.240(5) |
| O(2)-C(3)       | 1.422(5) |
| O(2)-H(2)       | 1.09(5)  |
| N(1)-C(10)      | 1.338(5) |
| N(1)-C(4)       | 1.483(5) |
| N(1)-H(1)       | 0.97(5)  |
| C(1)-C(2)       | 1.515(6) |
| C(1)-H(1A)      | 1.06(4)  |
| C(1)-H(1B)      | 1.00(6)  |
| C(1)-H(1C)      | 0.99(6)  |
| C(2)-C(3)       | 1.518(6) |
| C(2)-C(10)      | 1.519(5) |
| C(2)-H(2A)      | 1.05(4)  |
| C(3)-C(4)       | 1.531(6) |
| C(3)-H(3)       | 1.04(4)  |
| C(4)-C(5)       | 1.522(6) |
| C(4)-H(4)       | 1.05(4)  |
| C(5)-C(6)       | 1.510(5) |
| C(5)-H(5A)      | 1.01(4)  |
| C(5)-H(5B)      | 0.99(5)  |
| C(6)-C(12)      | 1.379(6) |
| C(6)-C(7)       | 1.395(6) |
| C(7)-C(8)       | 1.392(6) |
| C(7)-H(7)       | 0.94(4)  |
| C(8)-C(9)       | 1.363(6) |
| C(8)-H(8)       | 0.98(6)  |
| C(9)-N          | 1.351(6) |
| C(9)-H(9)       | 1.00(5)  |
| N-C(12)         | 1.351(5) |
| C(12)-H(12)     | 0.98(5)  |
| C(3)-O(2)-H(2)  | 114(3)   |
| C(10)-N(1)-C(4) | 112.2(4) |
| C(10)-N(1)-H(1) | 130(3)   |
| C(4)-N(1)-H(1)  | 117(3)   |
| C(2)-C(1)-H(1A) | 117(2)   |
| C(2)-C(1)-H(1B) | 111(3)   |

|                  |          |
|------------------|----------|
| H(1A)-C(1)-H(1B) | 105(4)   |
| C(2)-C(1)-H(1C)  | 109(3)   |
| H(1A)-C(1)-H(1C) | 107(4)   |
| H(1B)-C(1)-H(1C) | 108(4)   |
| C(1)-C(2)-C(3)   | 116.4(3) |
| C(1)-C(2)-C(10)  | 113.3(3) |
| C(3)-C(2)-C(10)  | 101.2(3) |
| C(1)-C(2)-H(2A)  | 115(2)   |
| C(3)-C(2)-H(2A)  | 106(2)   |
| C(10)-C(2)-H(2A) | 104(2)   |
| O(2)-C(3)-C(2)   | 111.2(3) |
| O(2)-C(3)-C(4)   | 108.5(3) |
| C(2)-C(3)-C(4)   | 102.1(3) |
| O(2)-C(3)-H(3)   | 108(2)   |
| C(2)-C(3)-H(3)   | 116(2)   |
| C(4)-C(3)-H(3)   | 111(2)   |
| N(1)-C(4)-C(5)   | 110.0(3) |
| N(1)-C(4)-C(3)   | 101.0(3) |
| C(5)-C(4)-C(3)   | 116.0(4) |
| N(1)-C(4)-H(4)   | 114(2)   |
| C(5)-C(4)-H(4)   | 106(2)   |
| C(3)-C(4)-H(4)   | 110(2)   |
| C(6)-C(5)-C(4)   | 114.1(3) |
| C(6)-C(5)-H(5A)  | 110(2)   |
| C(4)-C(5)-H(5A)  | 108(2)   |
| C(6)-C(5)-H(5B)  | 112(2)   |
| C(4)-C(5)-H(5B)  | 107(3)   |
| H(5A)-C(5)-H(5B) | 105(3)   |
| C(12)-C(6)-C(7)  | 116.7(4) |
| C(12)-C(6)-C(5)  | 122.0(4) |
| C(7)-C(6)-C(5)   | 121.2(4) |
| C(8)-C(7)-C(6)   | 119.7(4) |
| C(8)-C(7)-H(7)   | 120(2)   |
| C(6)-C(7)-H(7)   | 120(2)   |
| C(9)-C(8)-C(7)   | 119.1(4) |
| C(9)-C(8)-H(8)   | 122(3)   |
| C(7)-C(8)-H(8)   | 119(3)   |
| N-C(9)-C(8)      | 123.0(4) |
| N-C(9)-H(9)      | 115(3)   |
| C(8)-C(9)-H(9)   | 122(3)   |
| O(1)-C(10)-N(1)  | 125.6(4) |
| O(1)-C(10)-C(2)  | 126.4(4) |
| N(1)-C(10)-C(2)  | 108.0(3) |
| C(9)-N-C(12)     | 116.8(4) |
| N-C(12)-C(6)     | 124.6(4) |
| N-C(12)-H(12)    | 114(2)   |
| C(6)-C(12)-H(12) | 121(2)   |

---

Symmetry transformations used to generate equivalent atoms: 0

Table 4. Anisotropic displacement parameters ( $\text{\AA}^2 \times 10^3$ ) for 905295.

The anisotropic displacement factor exponent takes the form:

$$-2 \pi^2 [ h^2 a^{*2} U_{11} + \dots + 2 h k a^* b^* U_{12} ]$$

|       | U11   | U22   | U33   | U23   | U13   | U12   |
|-------|-------|-------|-------|-------|-------|-------|
| O(1)  | 34(2) | 46(2) | 38(2) | 0(1)  | 4(1)  | 4(1)  |
| O(2)  | 24(2) | 51(2) | 38(2) | -1(2) | -6(1) | -3(1) |
| N(1)  | 31(2) | 35(2) | 31(2) | 1(2)  | 3(2)  | 1(2)  |
| C(1)  | 38(3) | 39(2) | 49(3) | 7(2)  | 7(2)  | -3(2) |
| C(2)  | 25(2) | 36(2) | 36(2) | 3(2)  | 4(2)  | -4(2) |
| C(3)  | 16(2) | 49(2) | 37(2) | -1(2) | -4(2) | -3(2) |
| C(4)  | 16(2) | 46(2) | 34(2) | -2(2) | 7(2)  | 0(2)  |
| C(5)  | 25(2) | 45(3) | 39(2) | -1(2) | 7(2)  | -3(2) |
| C(6)  | 25(2) | 38(2) | 34(2) | -4(2) | 4(2)  | -4(2) |
| C(7)  | 29(2) | 37(2) | 38(2) | -3(2) | 0(2)  | -3(2) |
| C(8)  | 28(2) | 44(2) | 42(3) | -5(2) | -5(2) | 0(2)  |
| C(9)  | 25(2) | 48(2) | 36(2) | -7(2) | 2(2)  | -1(2) |
| C(10) | 24(2) | 40(2) | 36(2) | 0(2)  | -3(2) | -2(2) |
| N     | 36(2) | 51(2) | 34(2) | 0(2)  | 7(2)  | 0(2)  |
| C(12) | 35(2) | 39(2) | 38(2) | -3(2) | 4(2)  | -2(2) |

Table 5. Hydrogen coordinates ( $\times 10^4$ ) and isotropic displacement parameters ( $\text{\AA}^2 \times 10^3$ ) for 905295.

|       | x           | y         | z         | U(eq)  |
|-------|-------------|-----------|-----------|--------|
| H(2)  | -6770(110)  | -4020(60) | -670(20)  | 63(15) |
| H(2A) | -10780(90)  | -4550(40) | -2031(15) | 28(10) |
| H(1A) | -7420(90)   | -6790(50) | -1972(16) | 34(10) |
| H(5A) | -8400(80)   | 370(40)   | -1680(15) | 24(10) |
| H(4)  | -11550(80)  | -1710(40) | -1825(14) | 28(10) |
| H(5B) | -6670(100)  | -620(50)  | -1251(17) | 40(13) |
| H(3)  | -10920(80)  | -3470(40) | -1105(15) | 23(9)  |
| H(1)  | -7010(100)  | -1330(50) | -2411(18) | 49(13) |
| H(1B) | -5650(130)  | -5840(50) | -1506(19) | 54(14) |
| H(9)  | -15350(110) | 1130(50)  | 250(20)   | 57(14) |
| H(1C) | -8770(120)  | -6390(60) | -1350(20) | 71(17) |
| H(12) | -9360(100)  | -1500(50) | -328(17)  | 44(12) |
| H(7)  | -12660(80)  | 1640(40)  | -1374(16) | 25(10) |
| H(8)  | -15680(130) | 2390(60)  | -650(20)  | 70(16) |

Table 6. Torsion angles [deg] for 905295.

---

|                      |           |
|----------------------|-----------|
| C(1)-C(2)-C(3)-O(2)  | 45.4(5)   |
| C(10)-C(2)-C(3)-O(2) | -77.9(4)  |
| C(1)-C(2)-C(3)-C(4)  | 160.9(3)  |
| C(10)-C(2)-C(3)-C(4) | 37.7(4)   |
| C(10)-N(1)-C(4)-C(5) | 143.6(4)  |
| C(10)-N(1)-C(4)-C(3) | 20.5(4)   |
| O(2)-C(3)-C(4)-N(1)  | 82.0(4)   |
| C(2)-C(3)-C(4)-N(1)  | -35.5(4)  |
| O(2)-C(3)-C(4)-C(5)  | -36.9(5)  |
| C(2)-C(3)-C(4)-C(5)  | -154.4(3) |
| N(1)-C(4)-C(5)-C(6)  | 175.3(3)  |
| C(3)-C(4)-C(5)-C(6)  | -70.9(5)  |
| C(4)-C(5)-C(6)-C(12) | 79.5(5)   |
| C(4)-C(5)-C(6)-C(7)  | -102.2(5) |
| C(12)-C(6)-C(7)-C(8) | 0.8(6)    |
| C(5)-C(6)-C(7)-C(8)  | -177.5(4) |
| C(6)-C(7)-C(8)-C(9)  | -1.5(6)   |
| C(7)-C(8)-C(9)-N     | 1.0(6)    |
| C(4)-N(1)-C(10)-O(1) | -174.8(4) |
| C(4)-N(1)-C(10)-C(2) | 3.6(5)    |
| C(1)-C(2)-C(10)-O(1) | 26.6(6)   |
| C(3)-C(2)-C(10)-O(1) | 152.0(4)  |
| C(1)-C(2)-C(10)-N(1) | -151.8(4) |
| C(3)-C(2)-C(10)-N(1) | -26.4(4)  |
| C(8)-C(9)-N-C(12)    | 0.2(6)    |
| C(9)-N-C(12)-C(6)    | -1.0(6)   |
| C(7)-C(6)-C(12)-N    | 0.4(6)    |
| C(5)-C(6)-C(12)-N    | 178.8(4)  |

---

Symmetry transformations used to generate equivalent atoms: 0
